# Supplementary material
Source: PubMed Central journal article supplement (PMC7242365)
Supplement: 41396_2020_616_MOESM2_ESM.pdf [file 41396_2020_616_MOESM2_ESM.pdf]

Figure S1 Bayesian and ML trees for 13 horizontally transferred genes (the highly divergent ATPase gene is excluded) and 2 duplicated mitochondrial support genes. Bayesian posterior probability and ML bootstrap value are shown for nodes with  $\geq 50\%$  support. Genes from this study are shown in red. Gene expression values (FPKM) of each tissue in ALF and GWSS are shown in colored boxes: GWSS-red bacteriome (red), GWSS-yellow bacteriome (yellow), GWSS-body (black), ALF-*Sulcia* bacteriocyte (purple), ALF-*Nasuia* bacteriocyte (green), and ALF-body (black).

rnc-Bayes

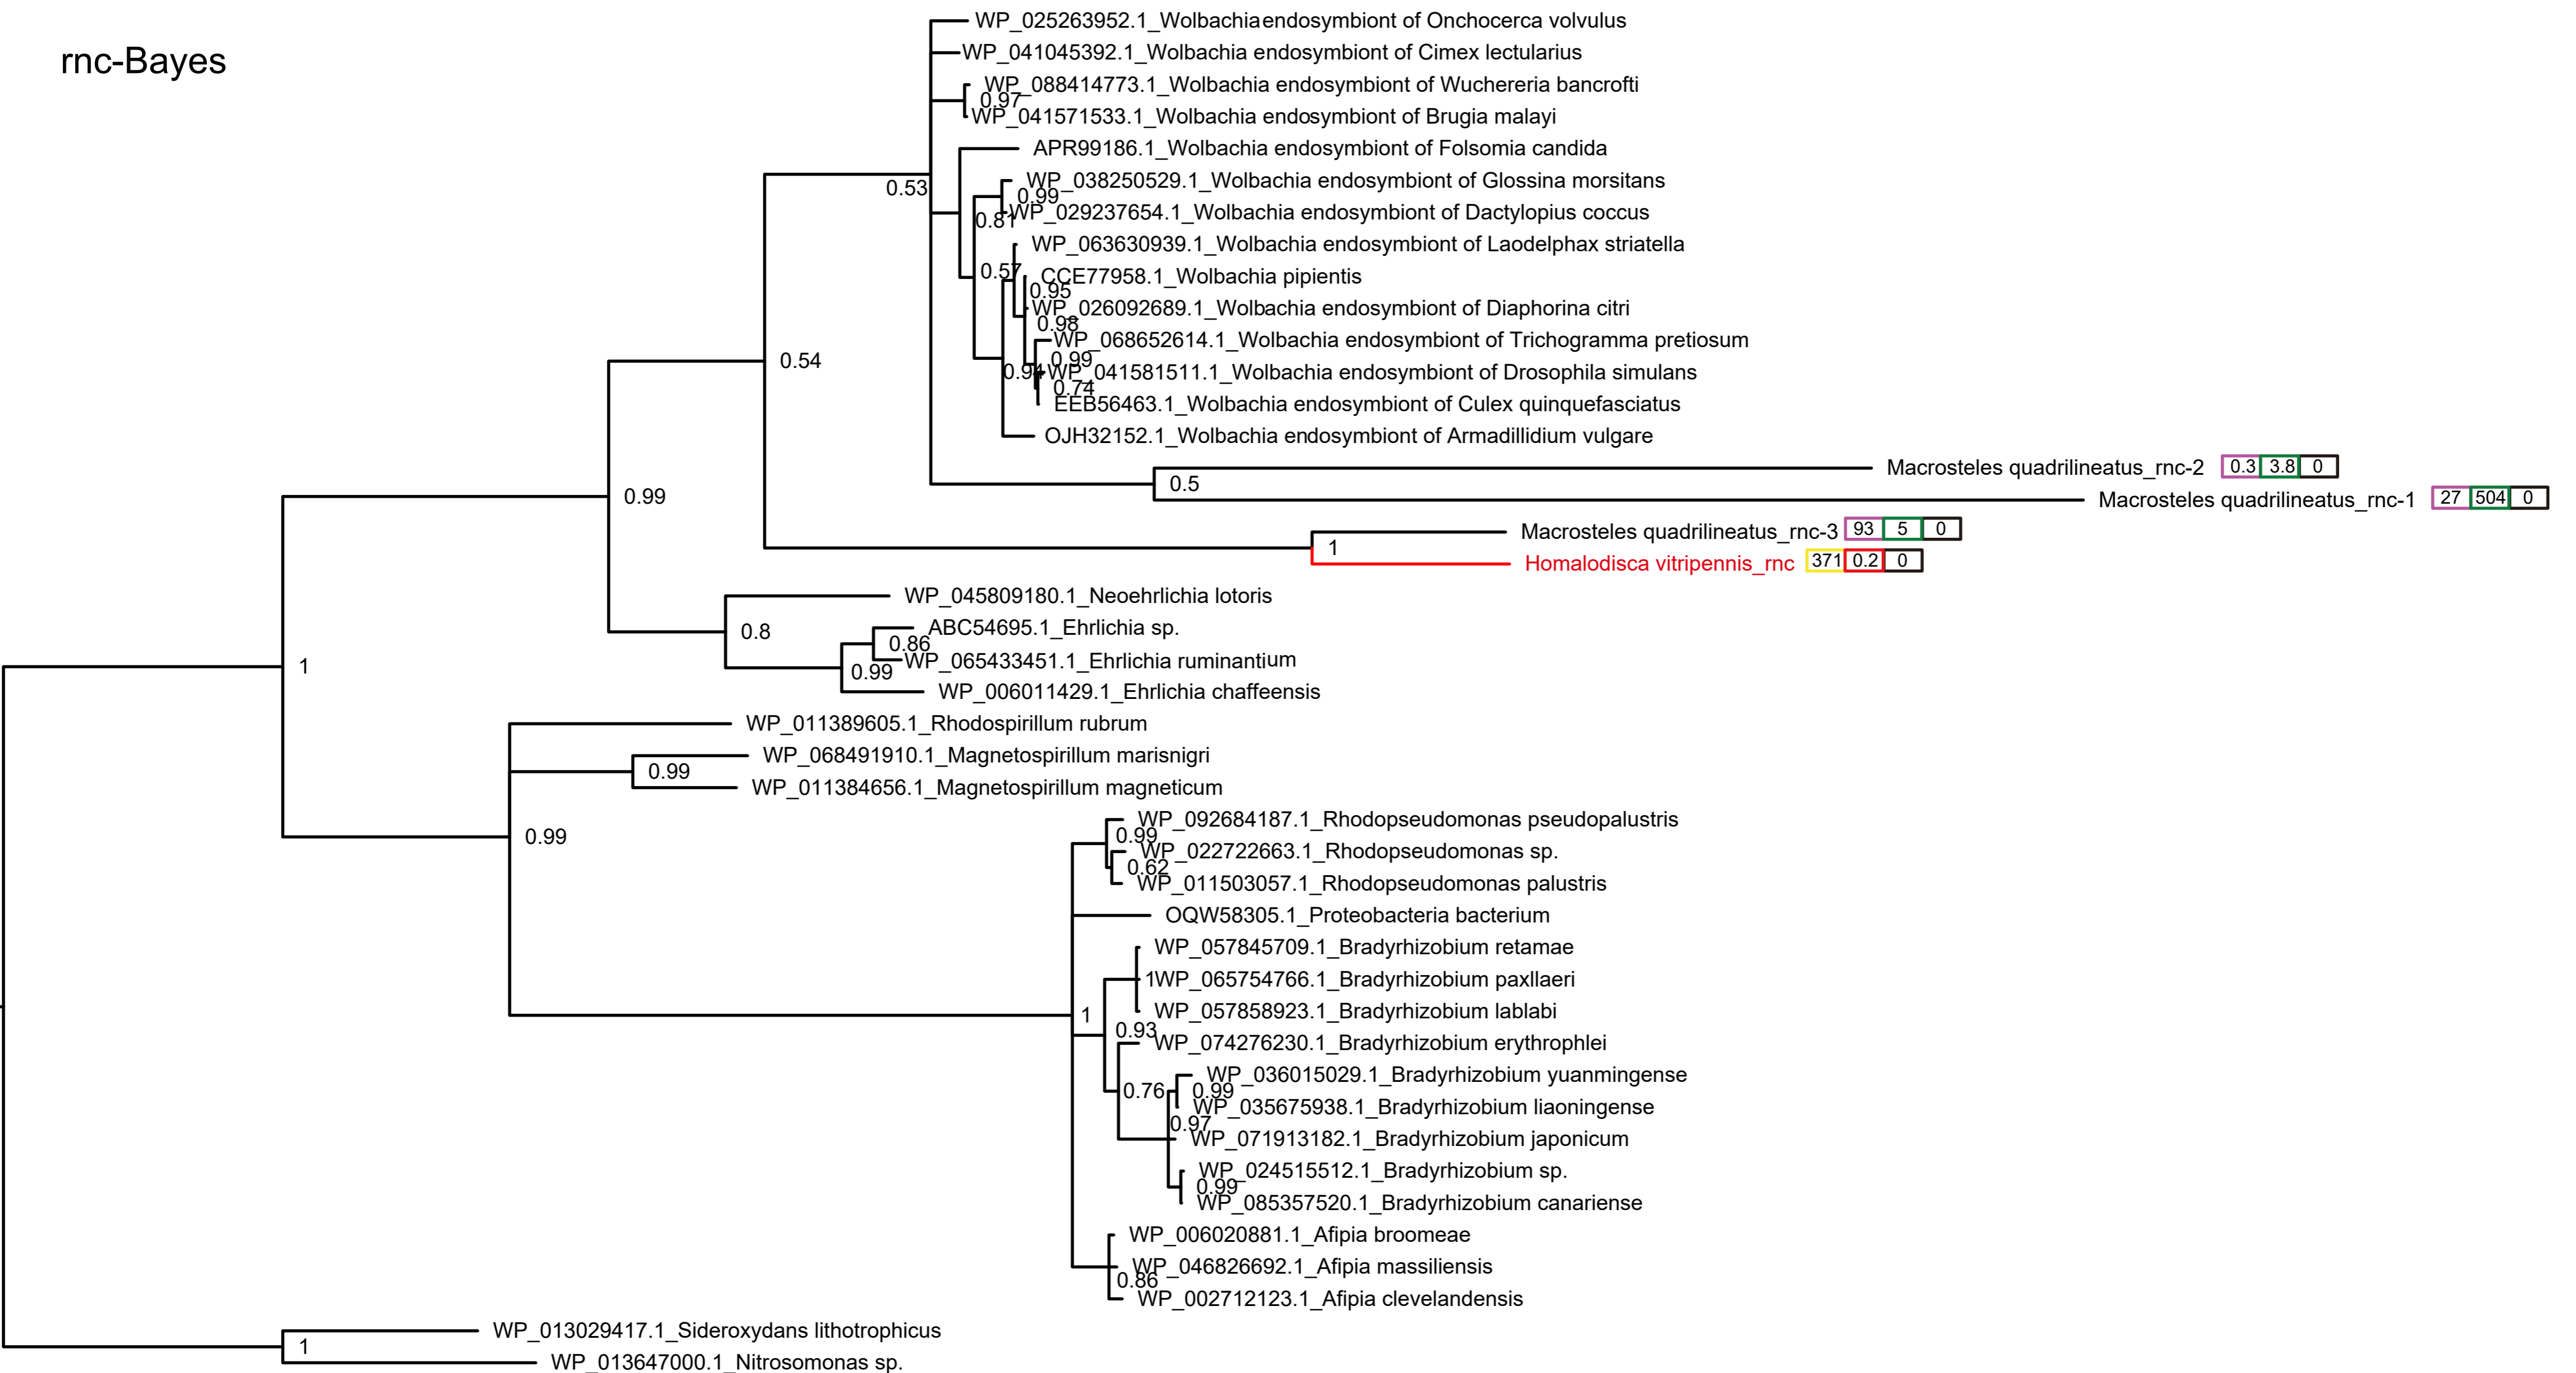

0.5

rnc-ML  
Model: LG+I+G

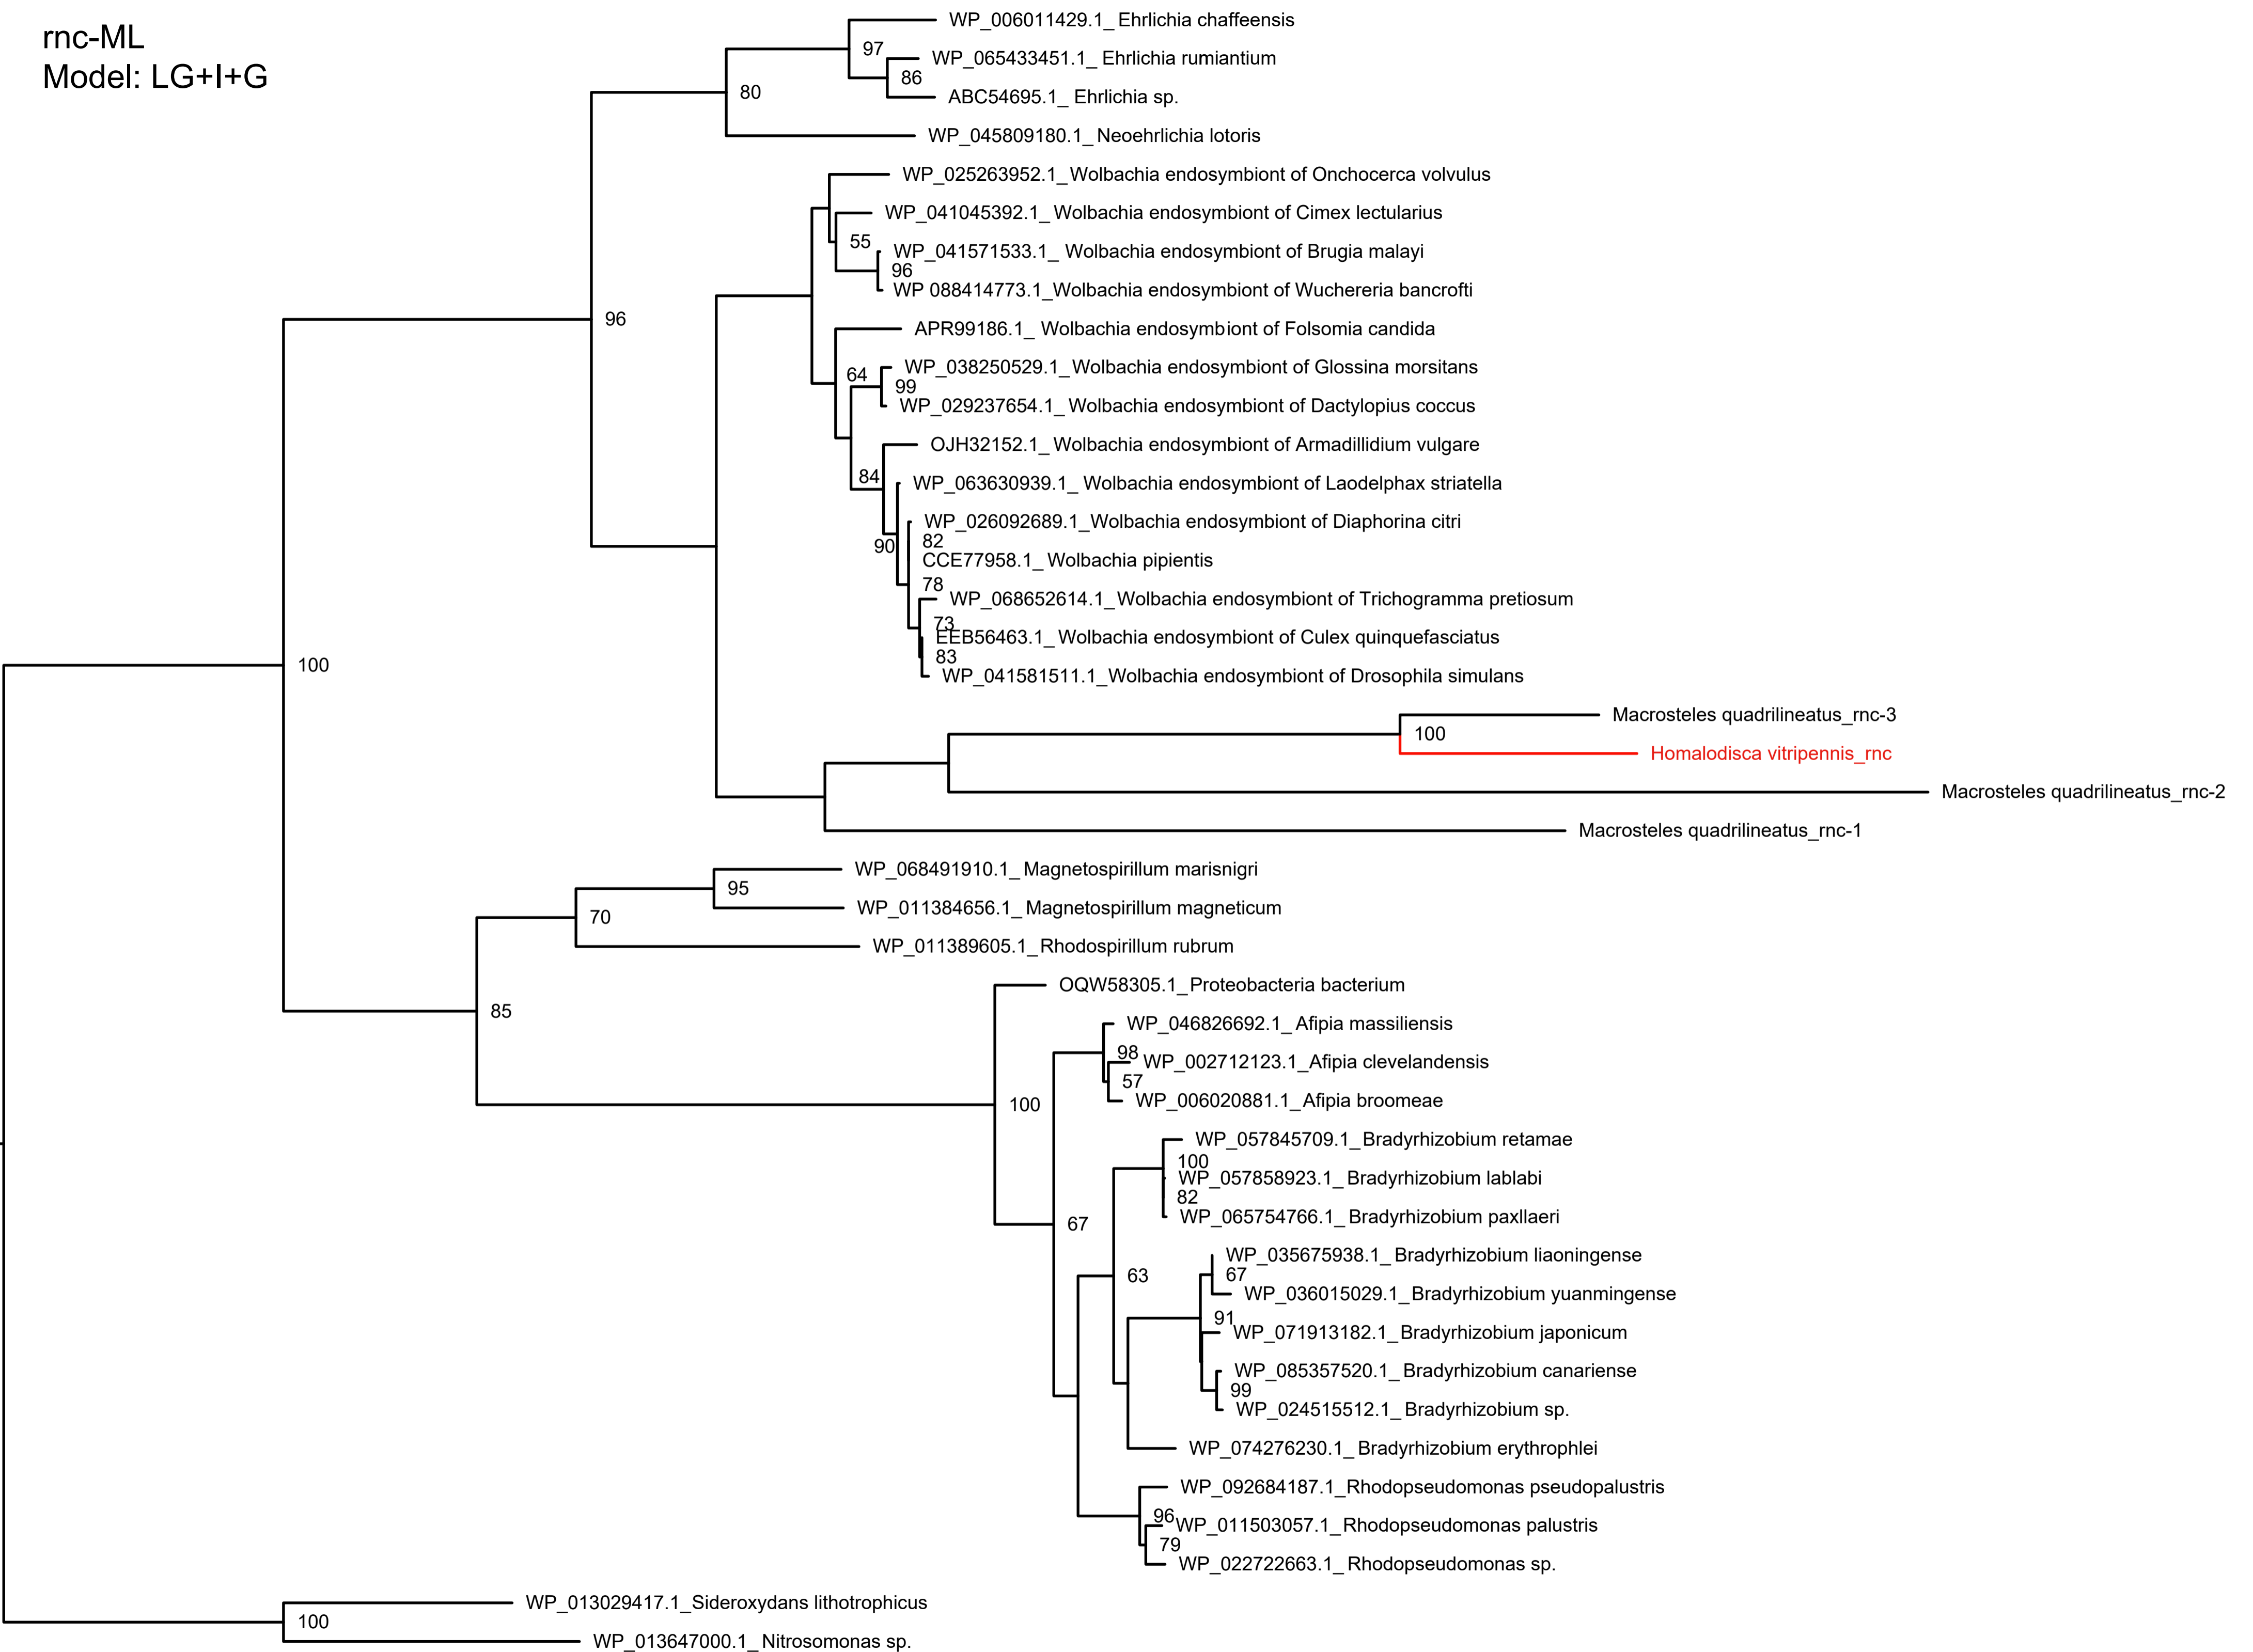

0.8

# ileS-Bayes

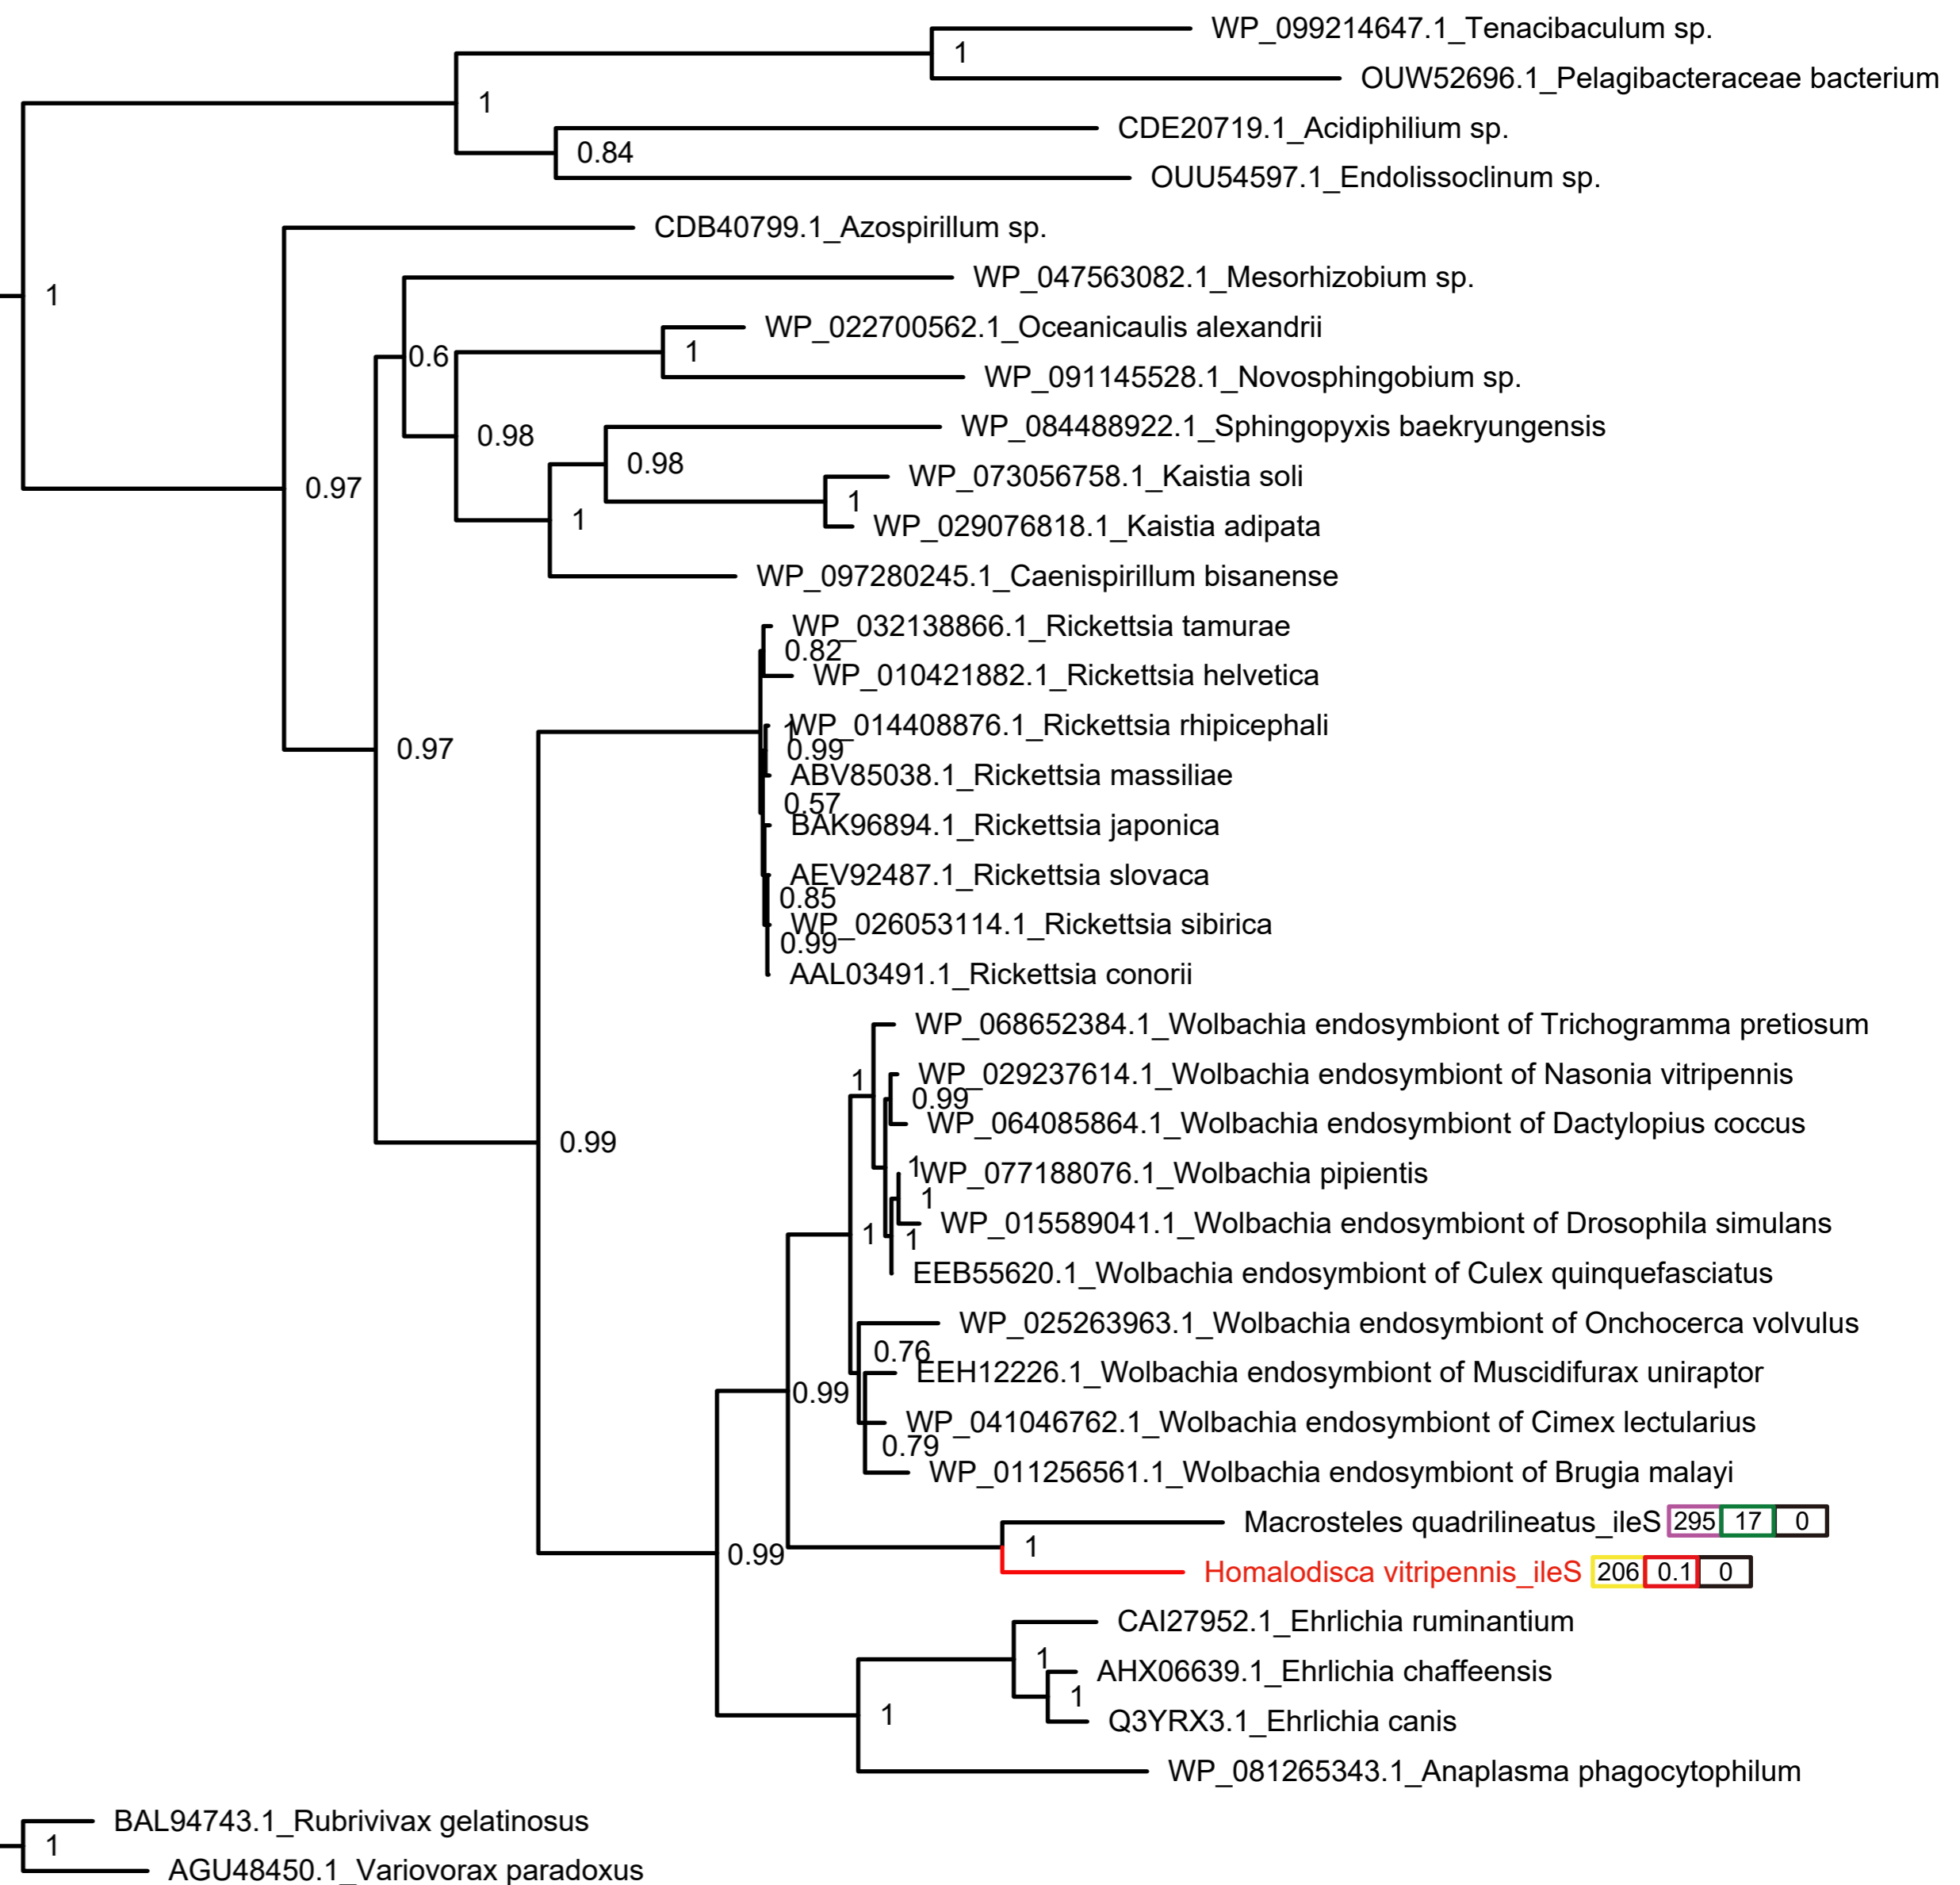

0.6

ileS-ML  
Model: LG+I+G

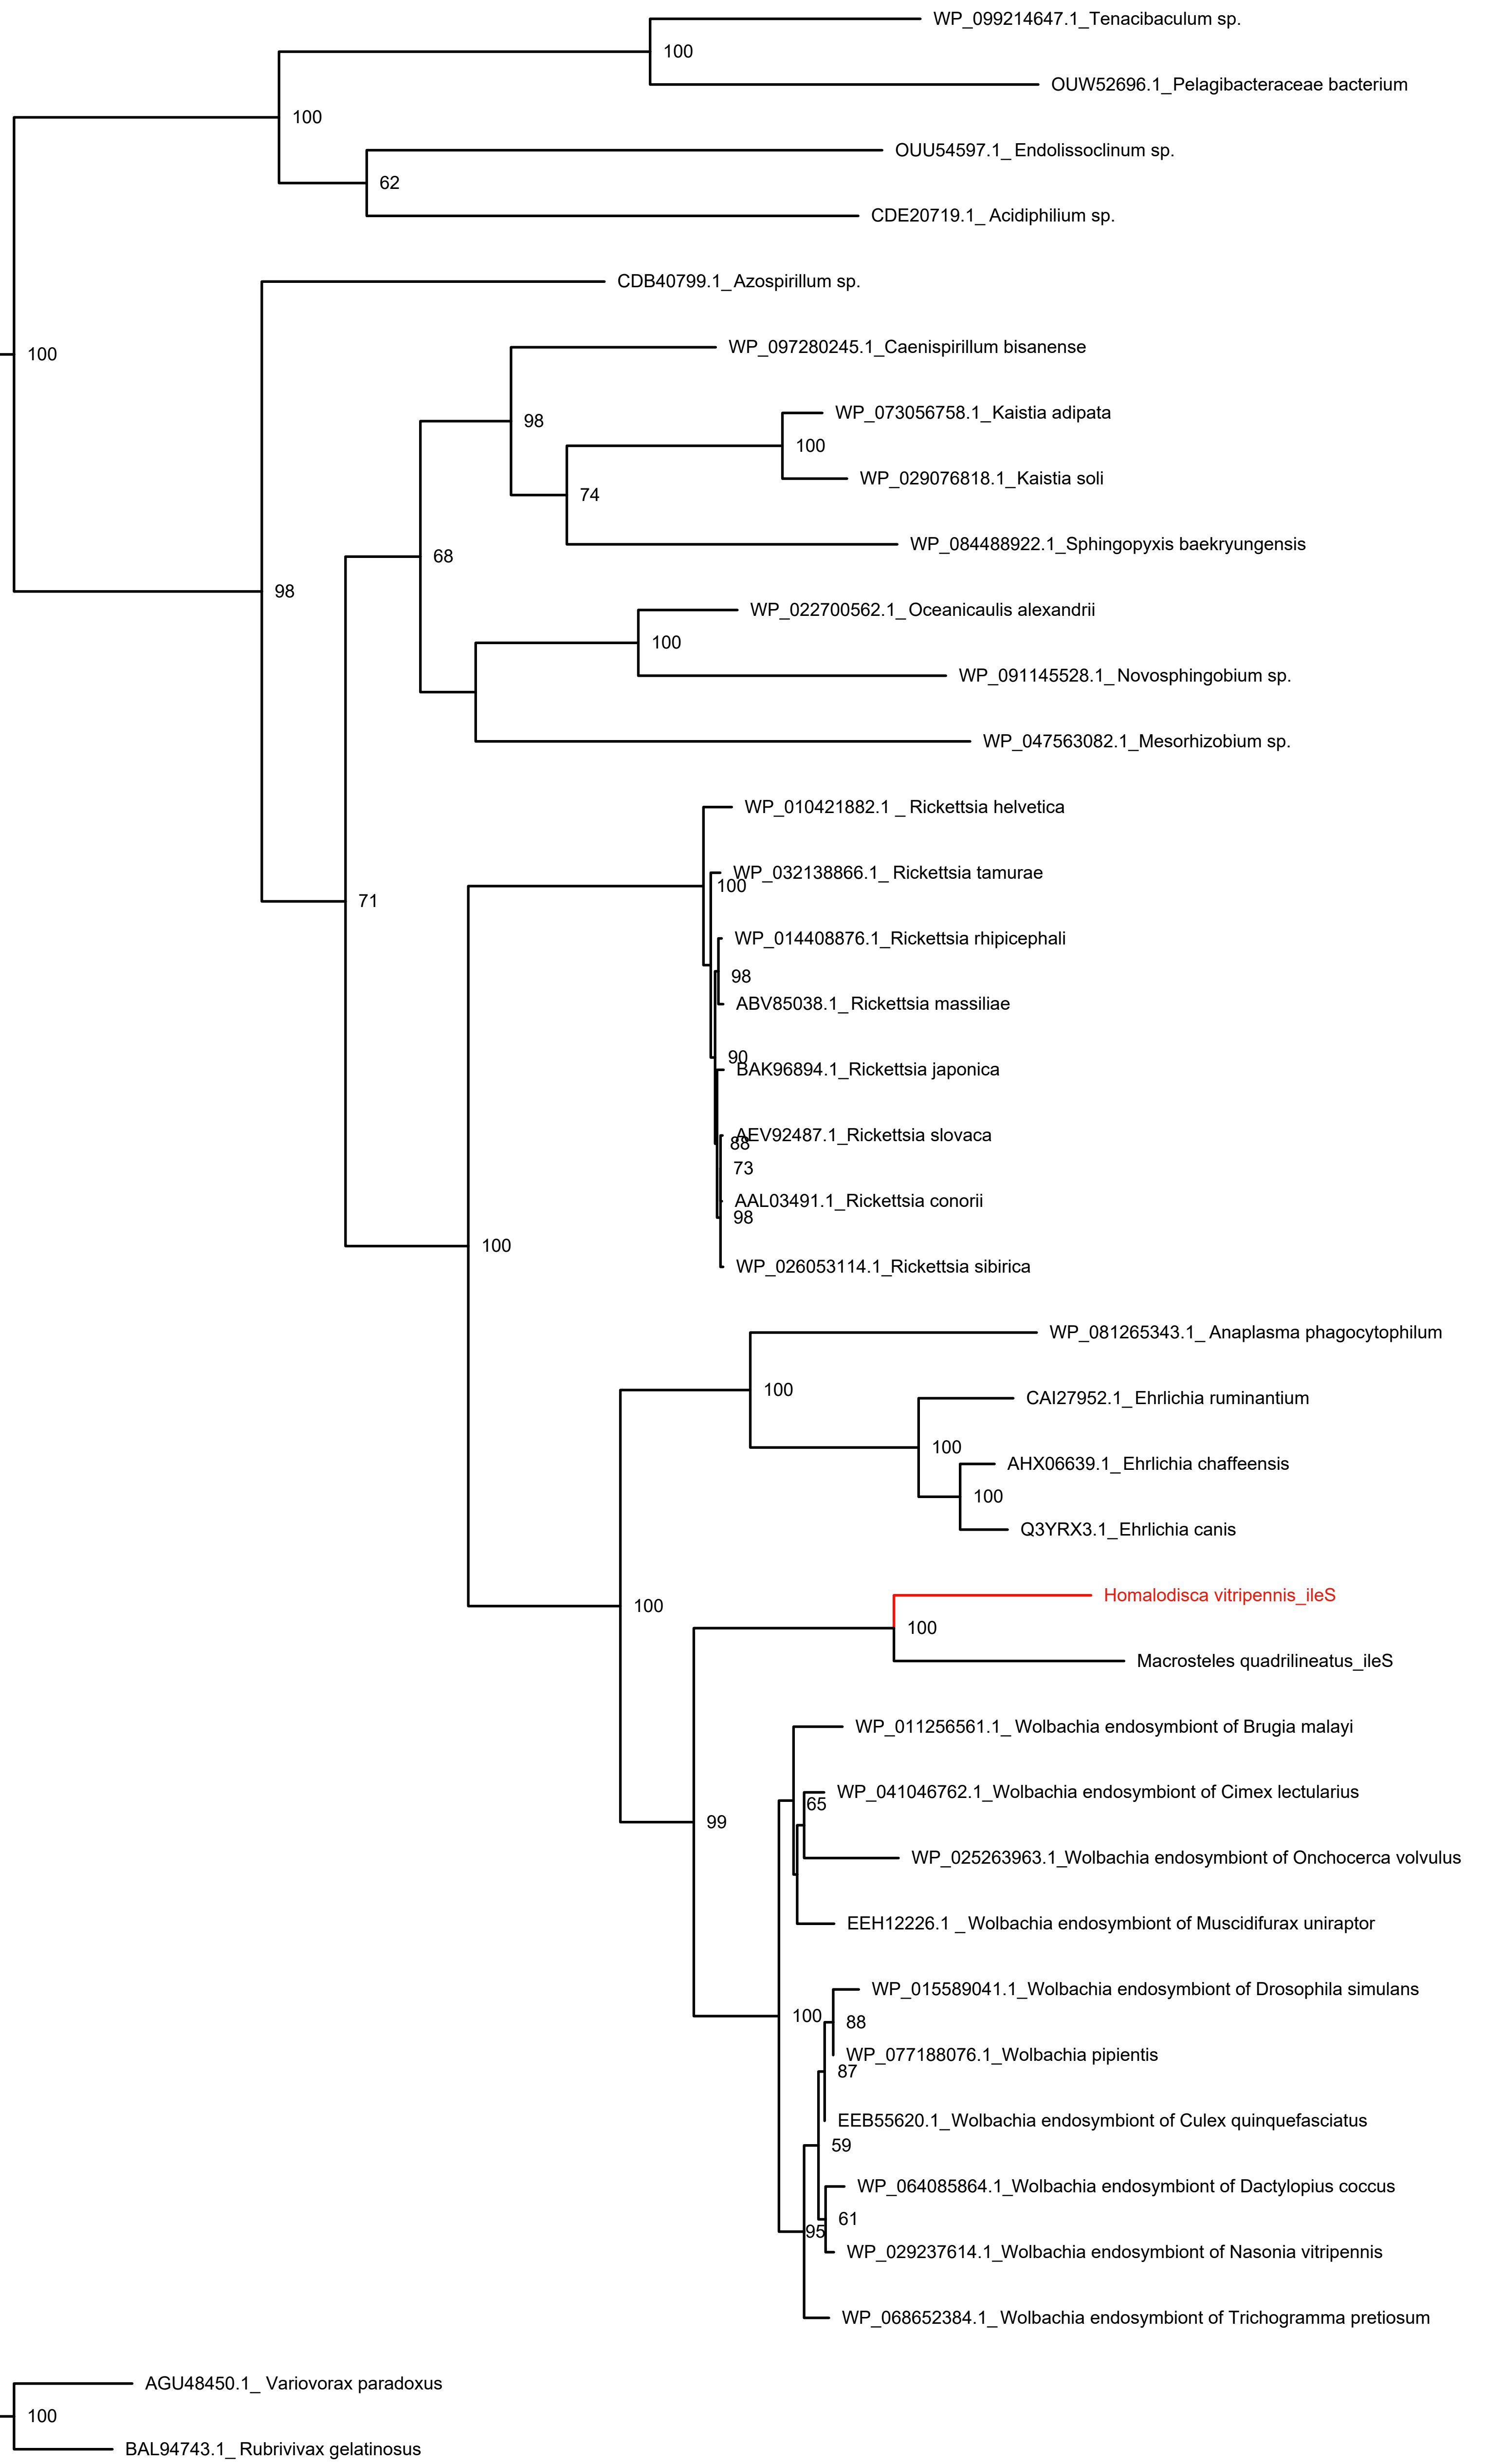

0.5

frr-Bayes

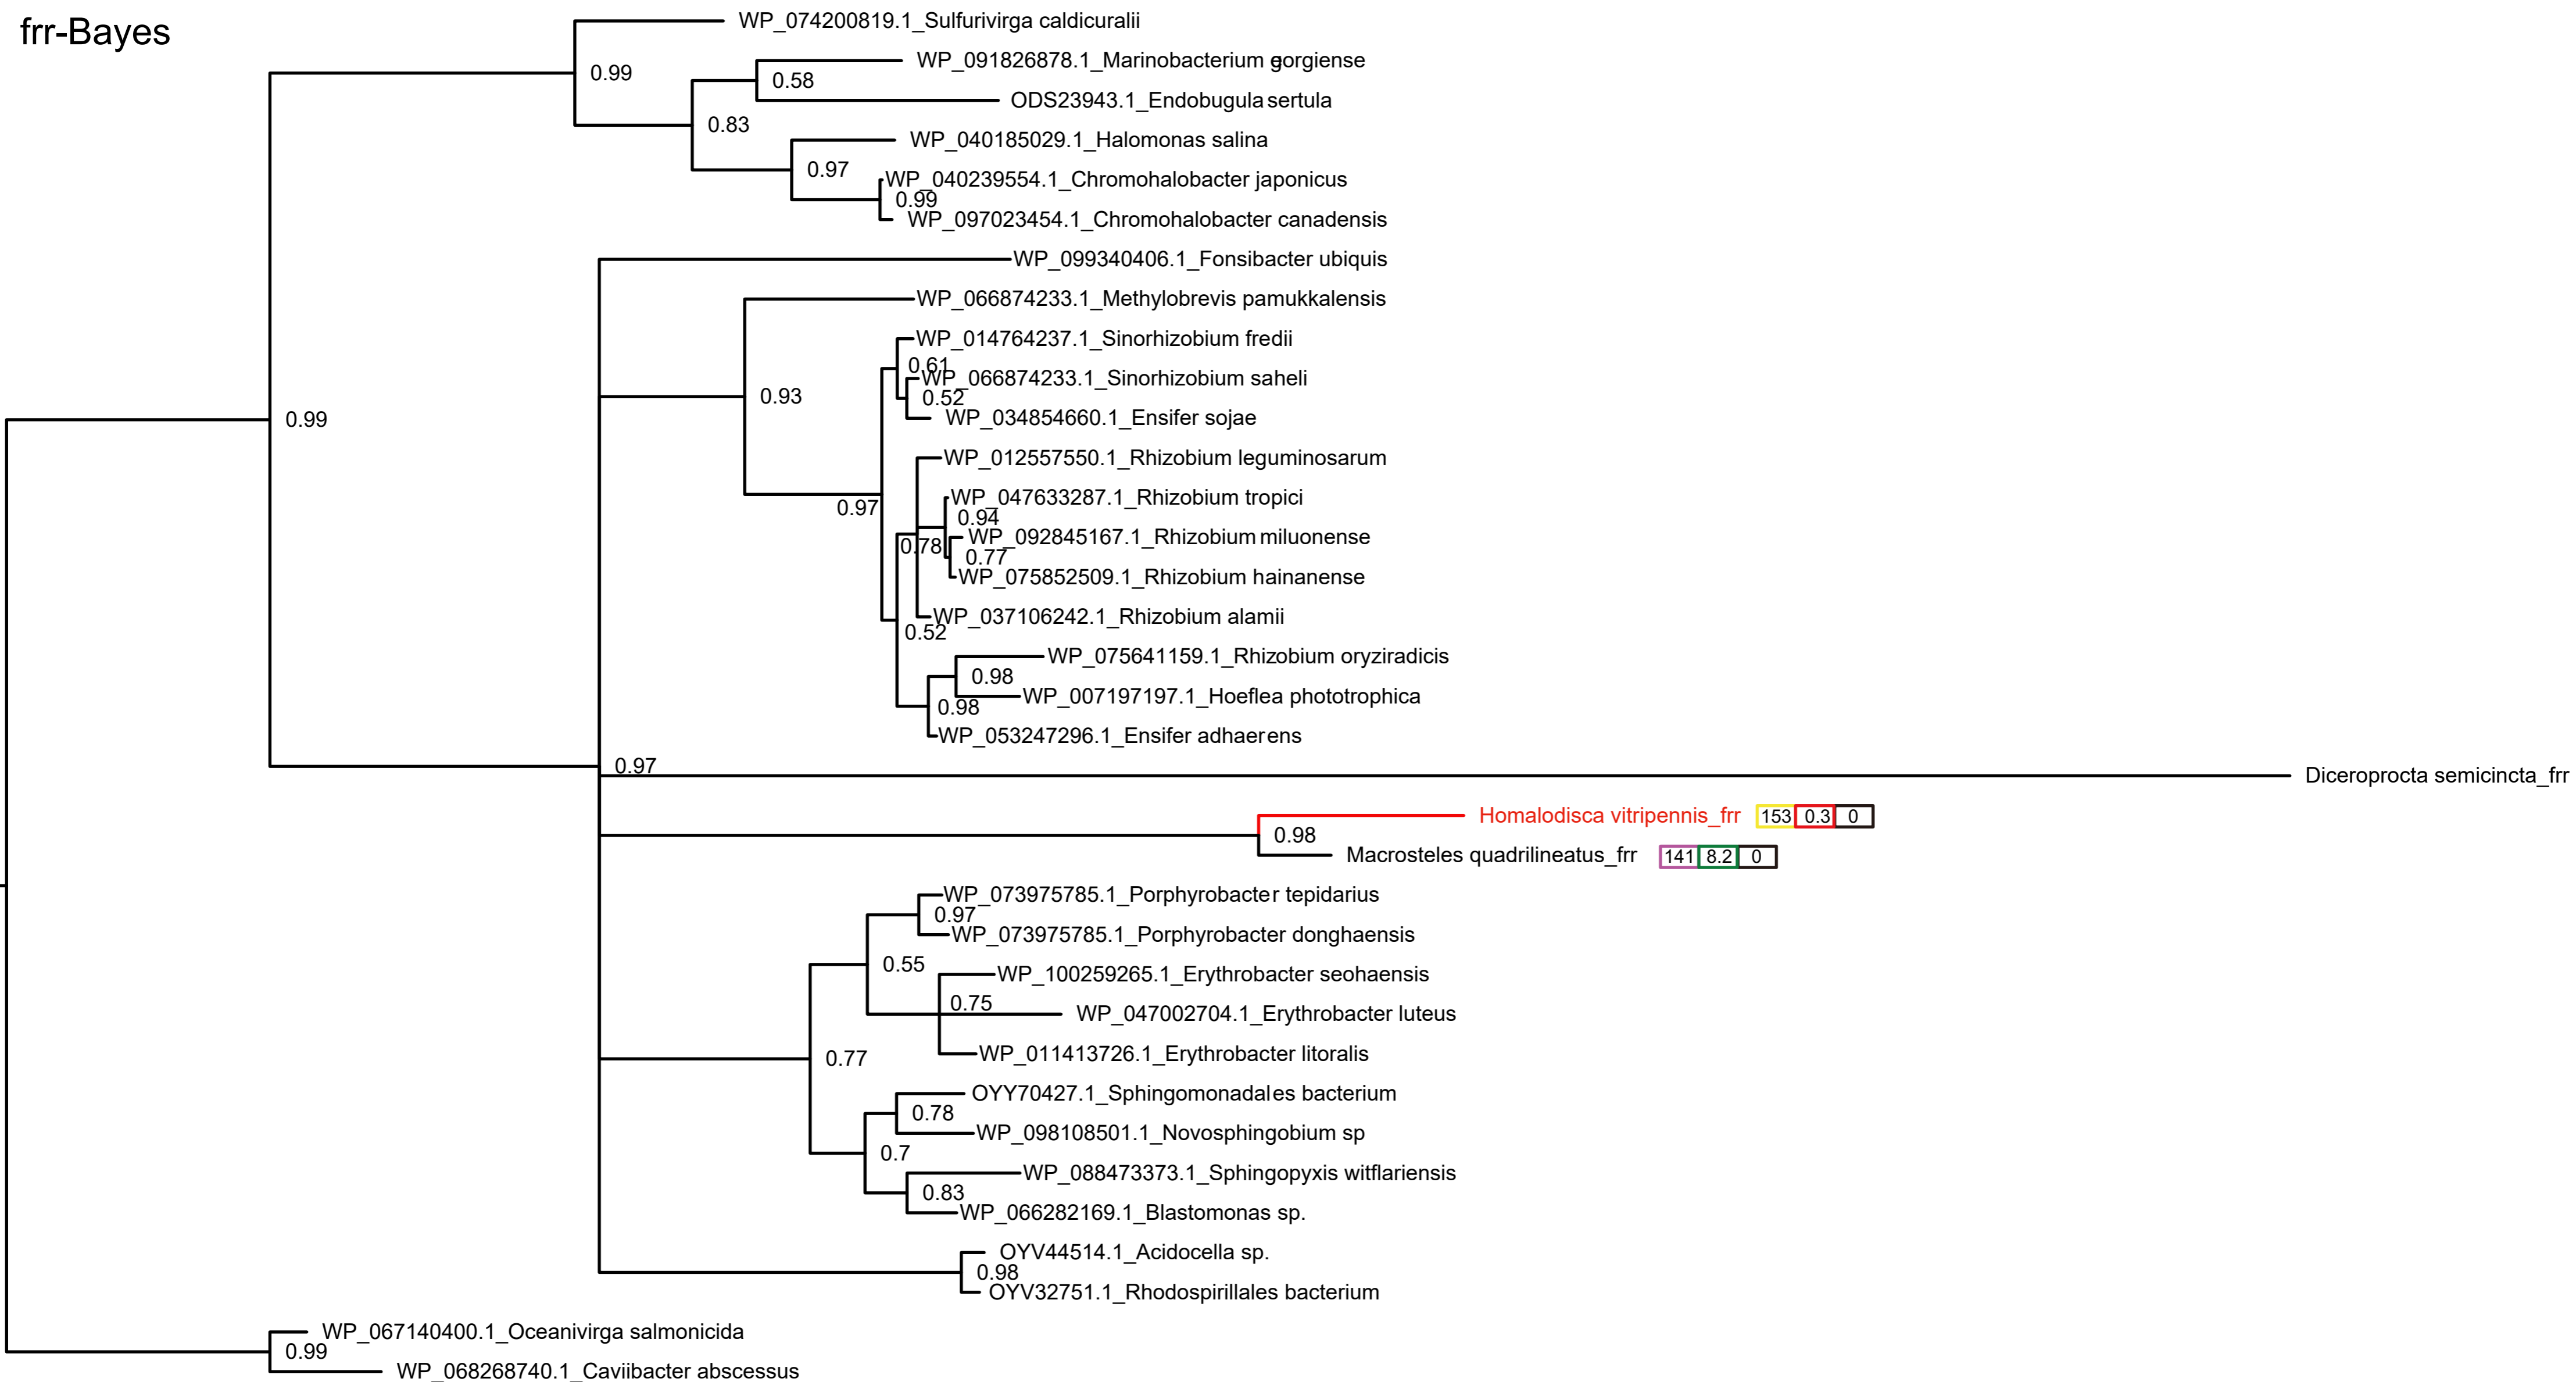

0.5

frr-ML  
Model: LG+I+G

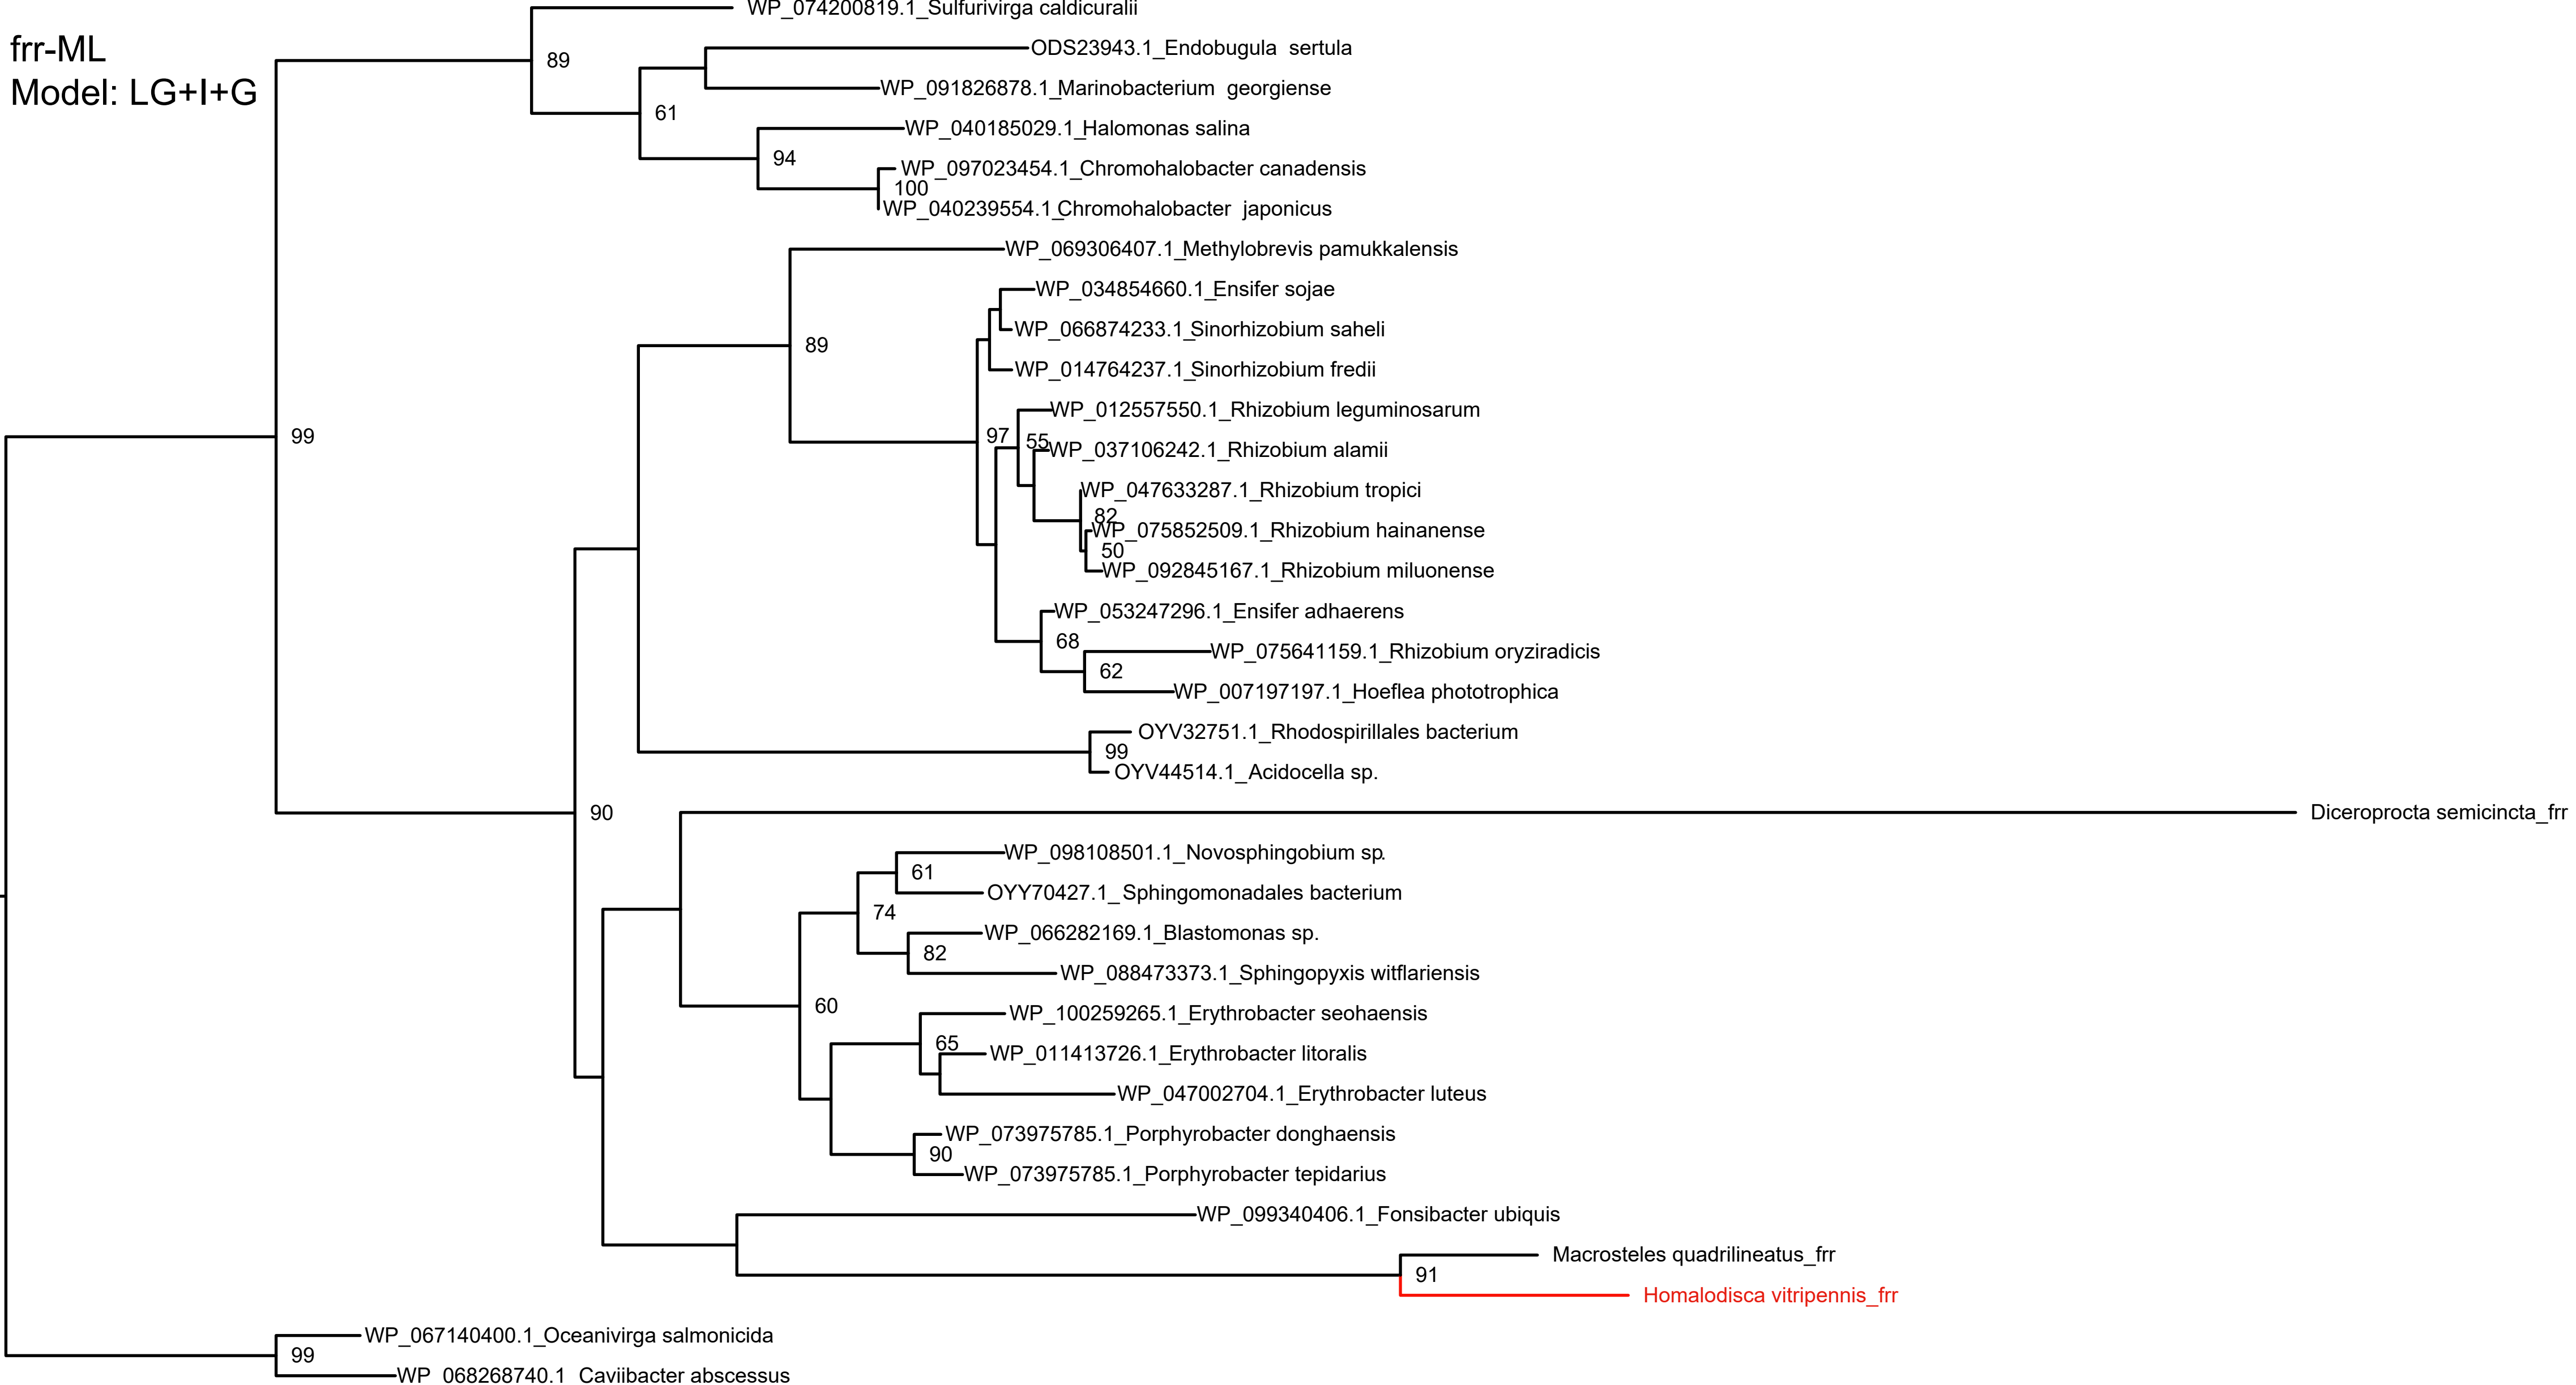

0.3

# def-Bayes

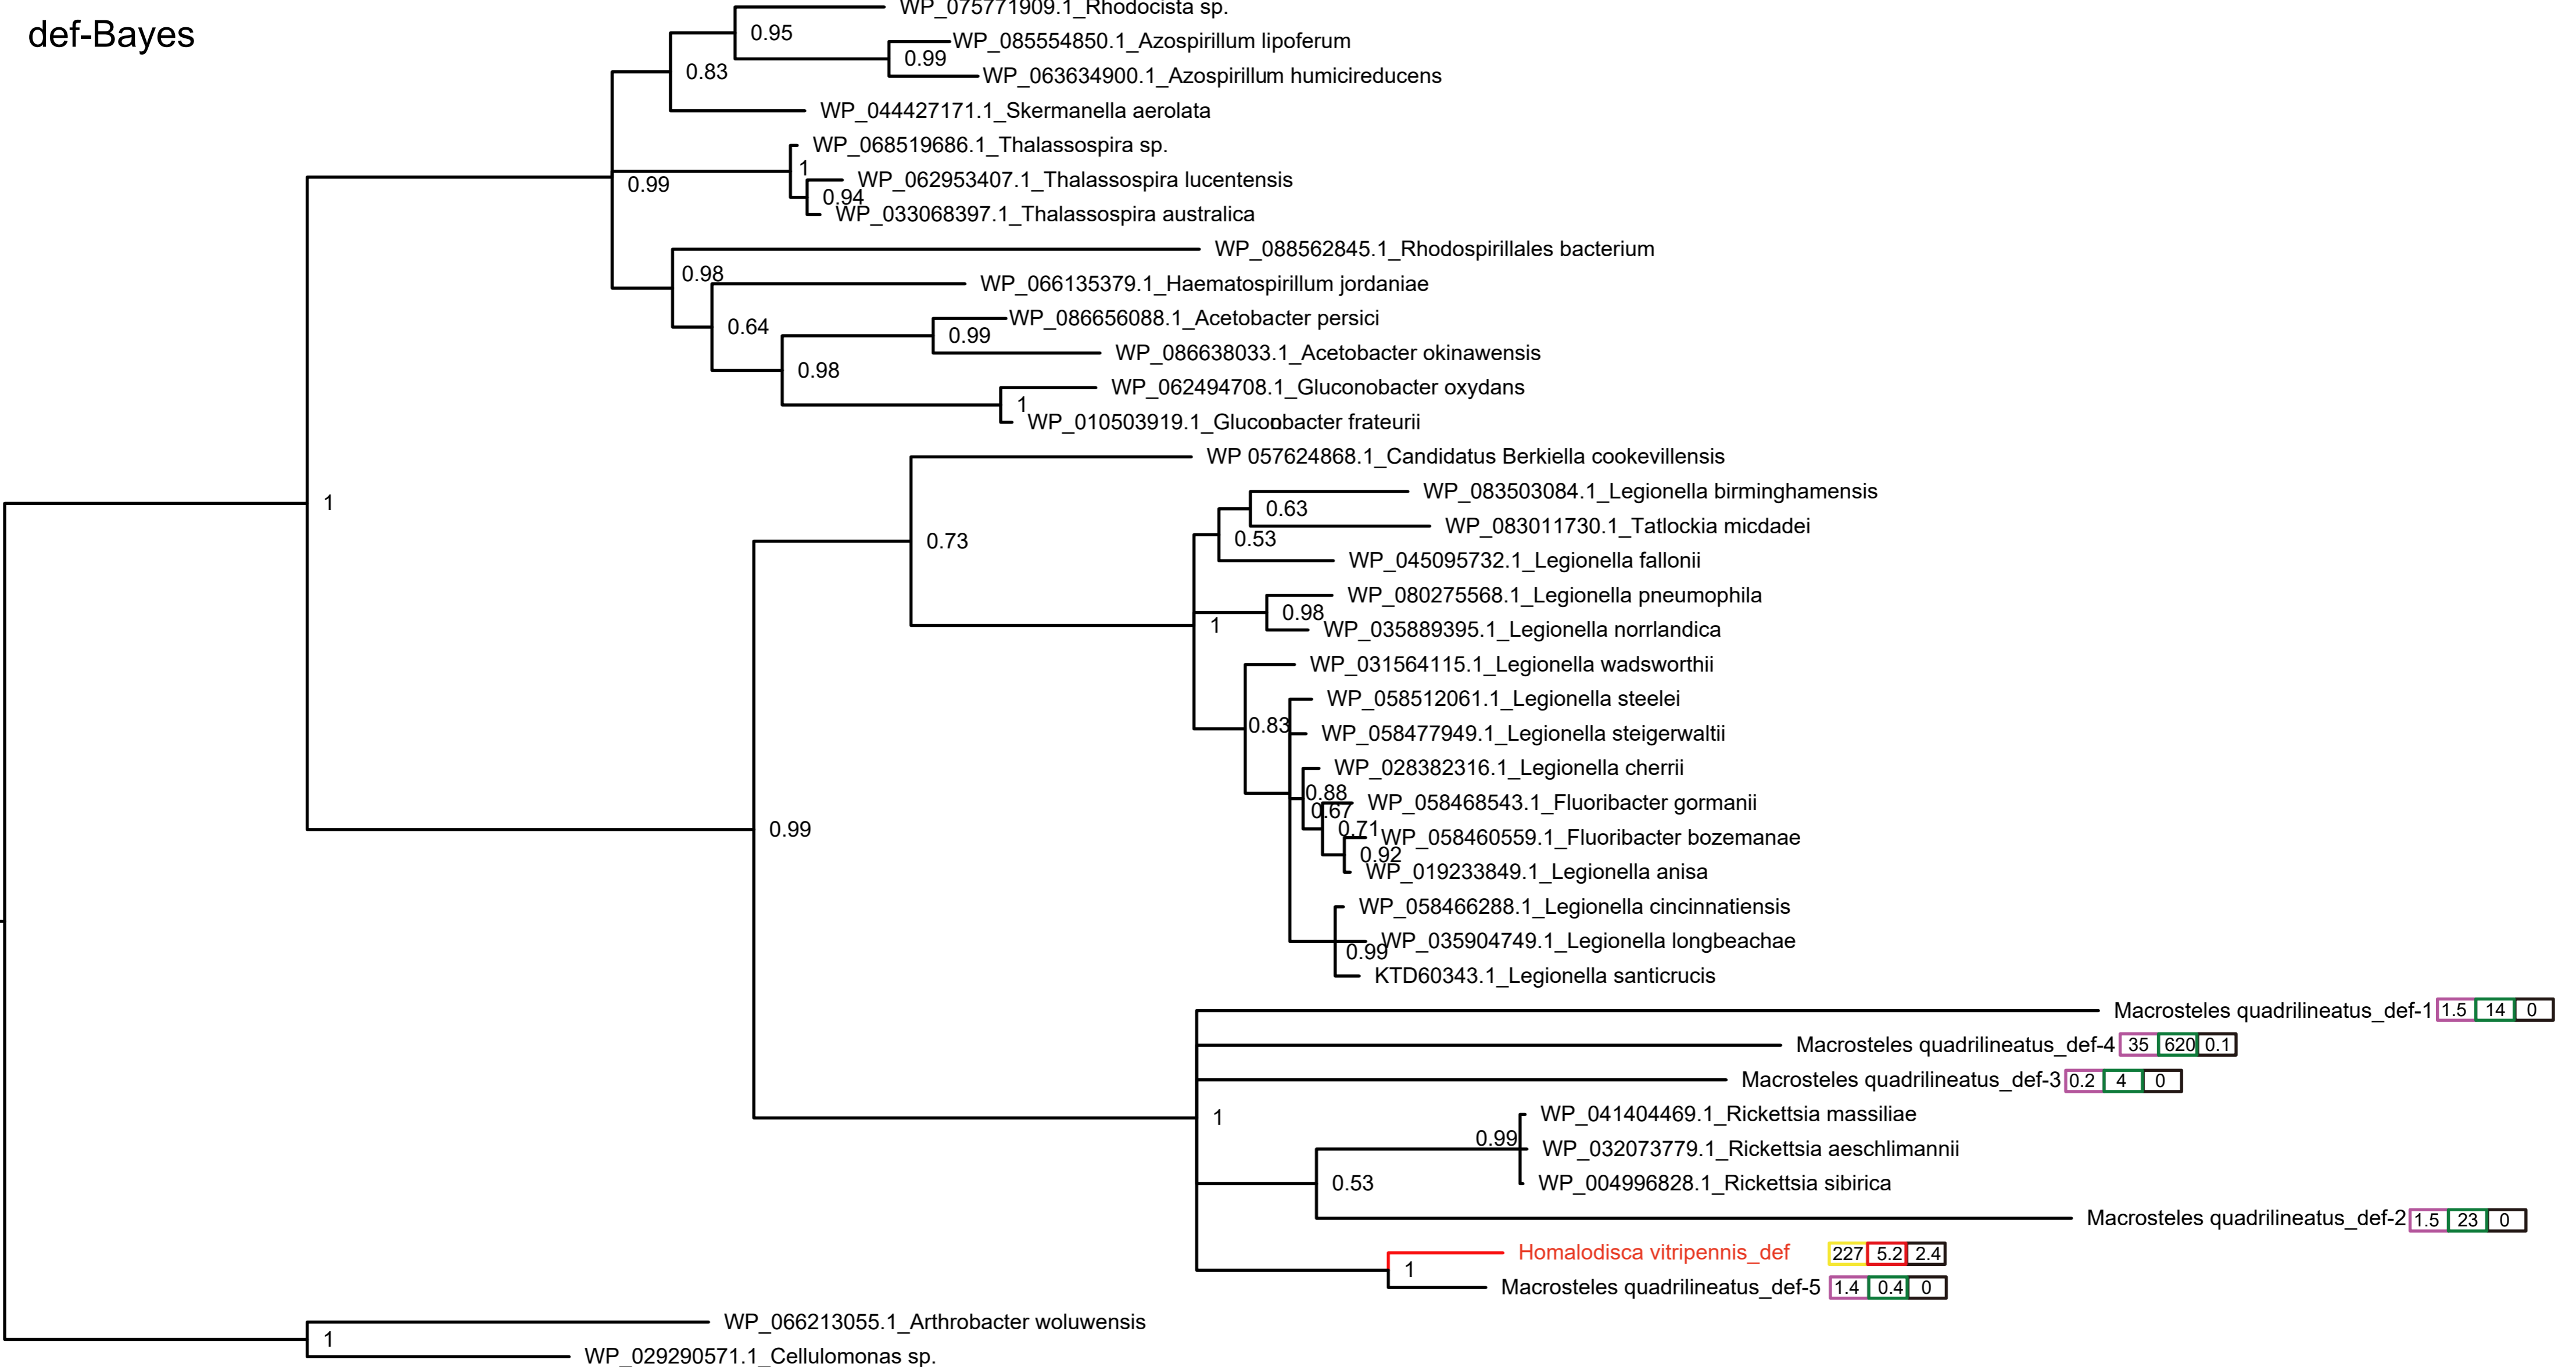



def-ML  
Model: LG+I+G

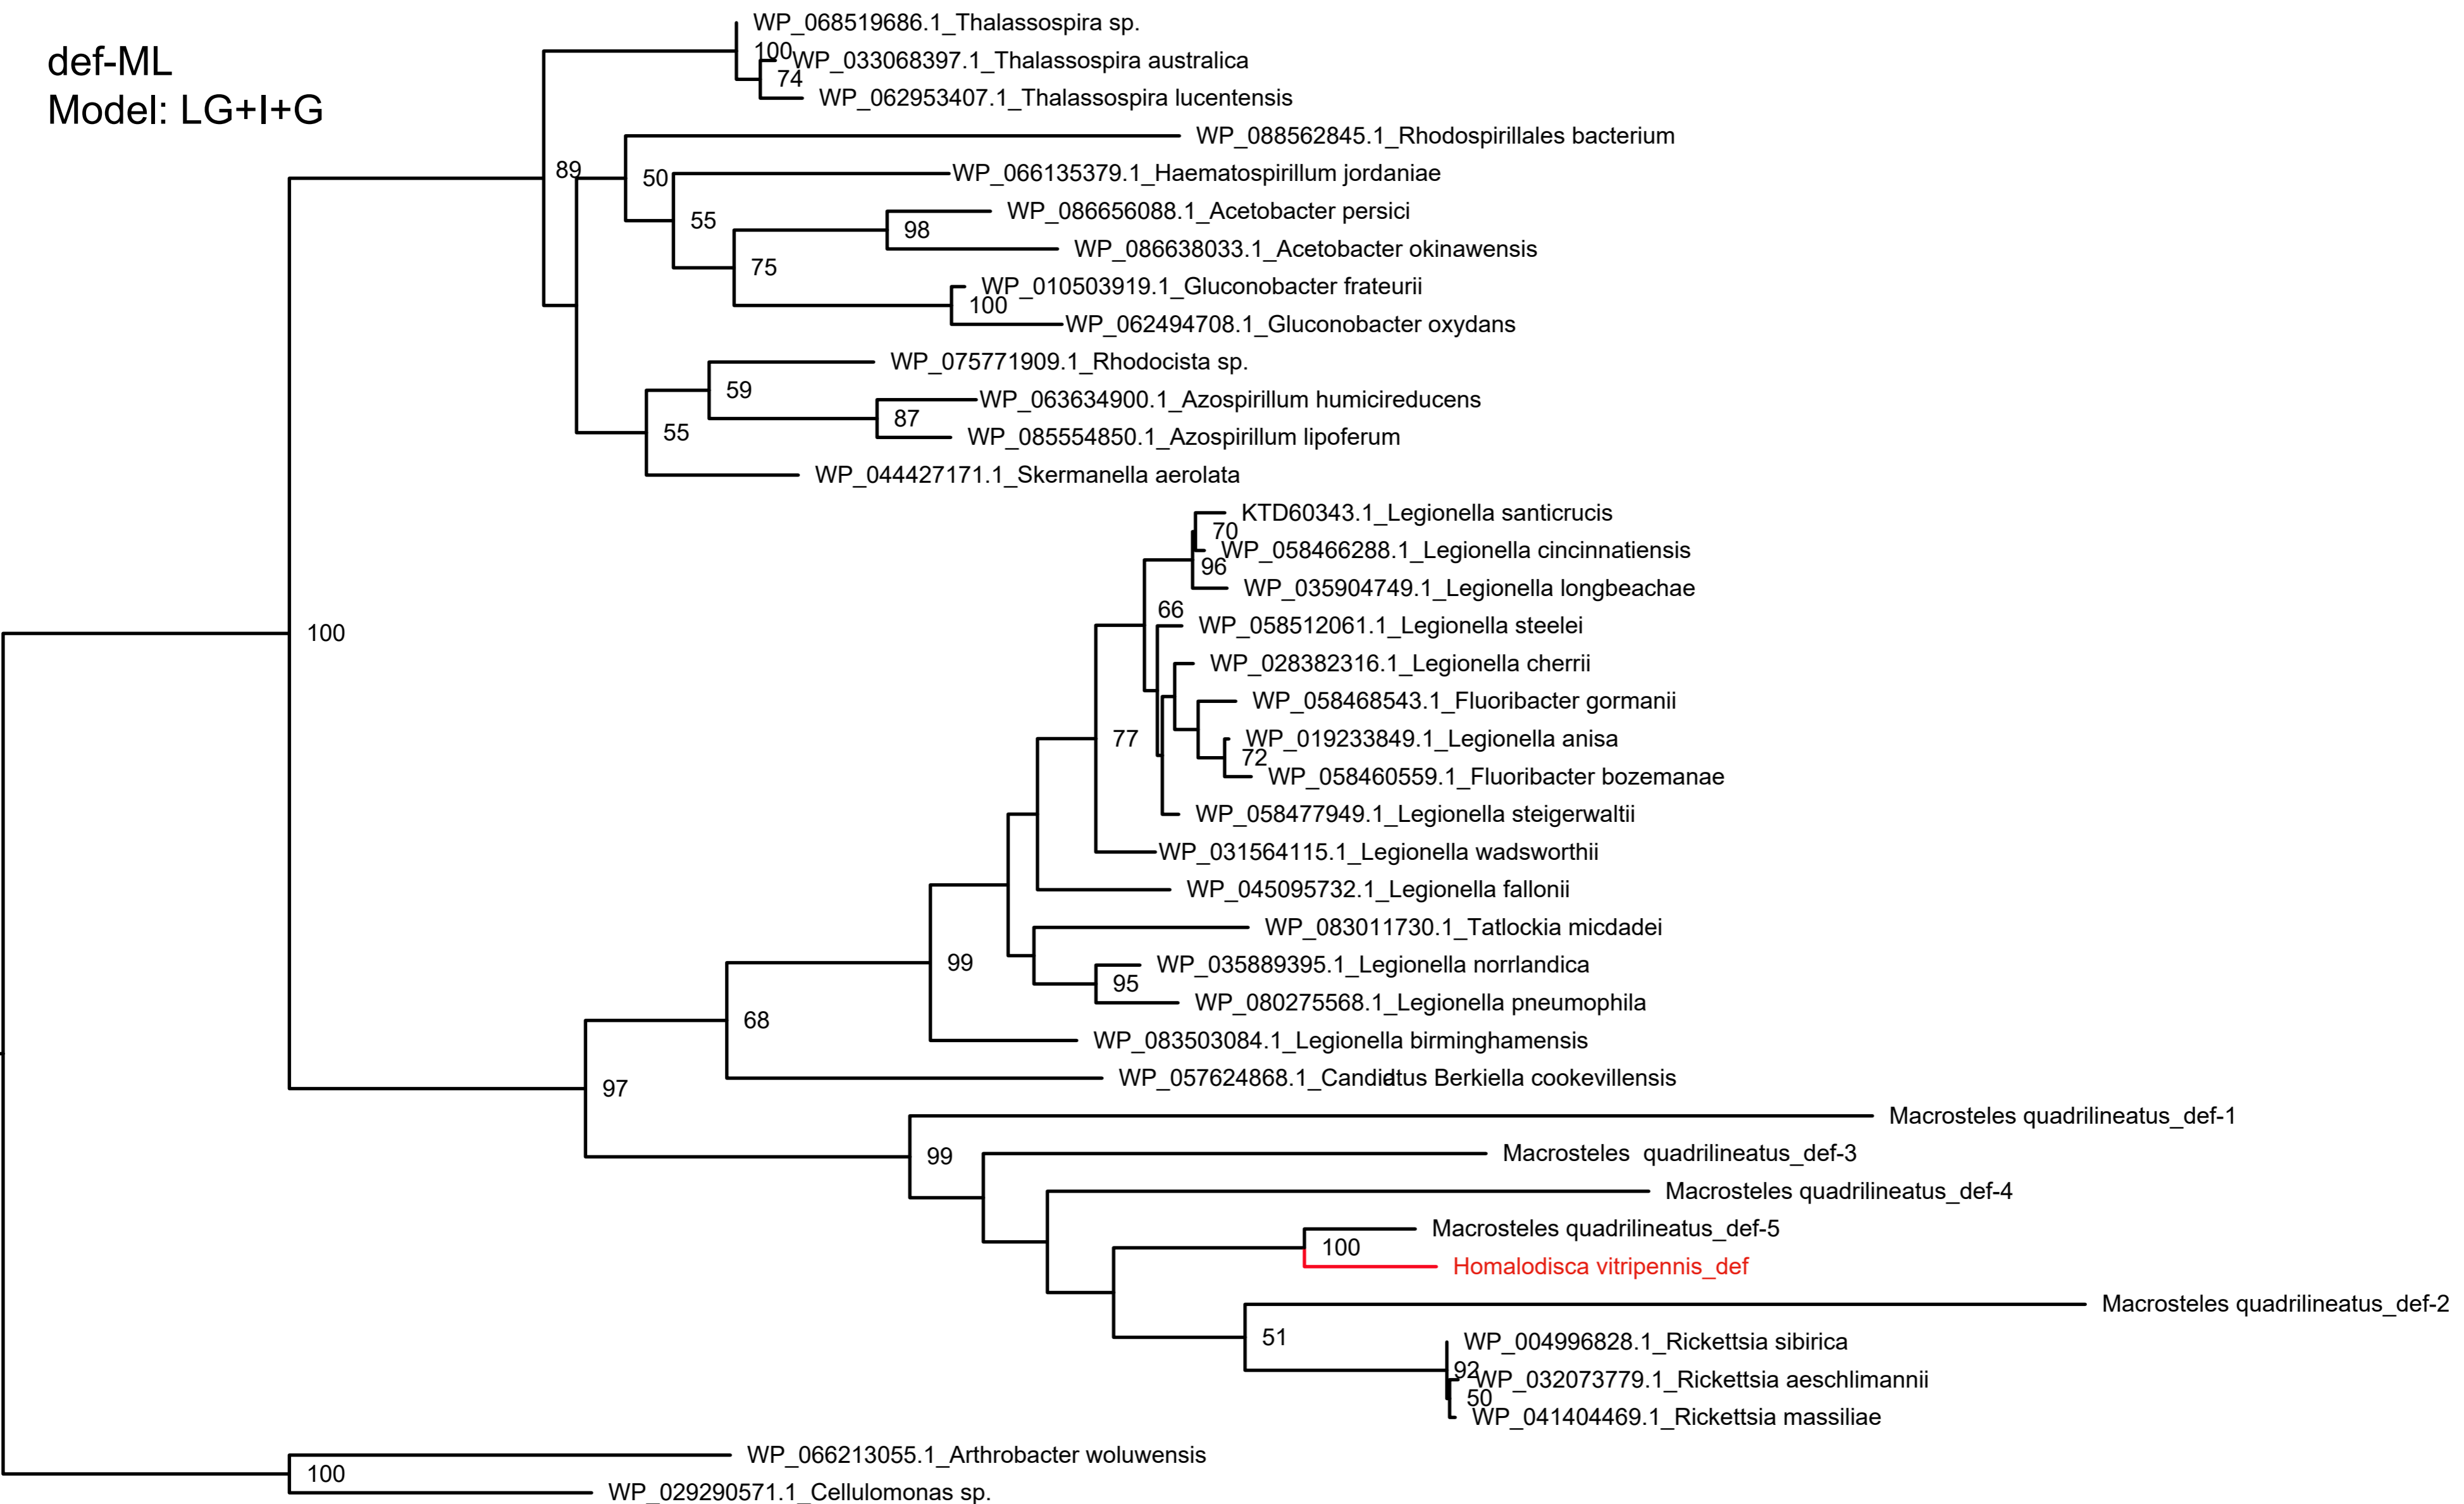

0.4

# yebC-Bayes

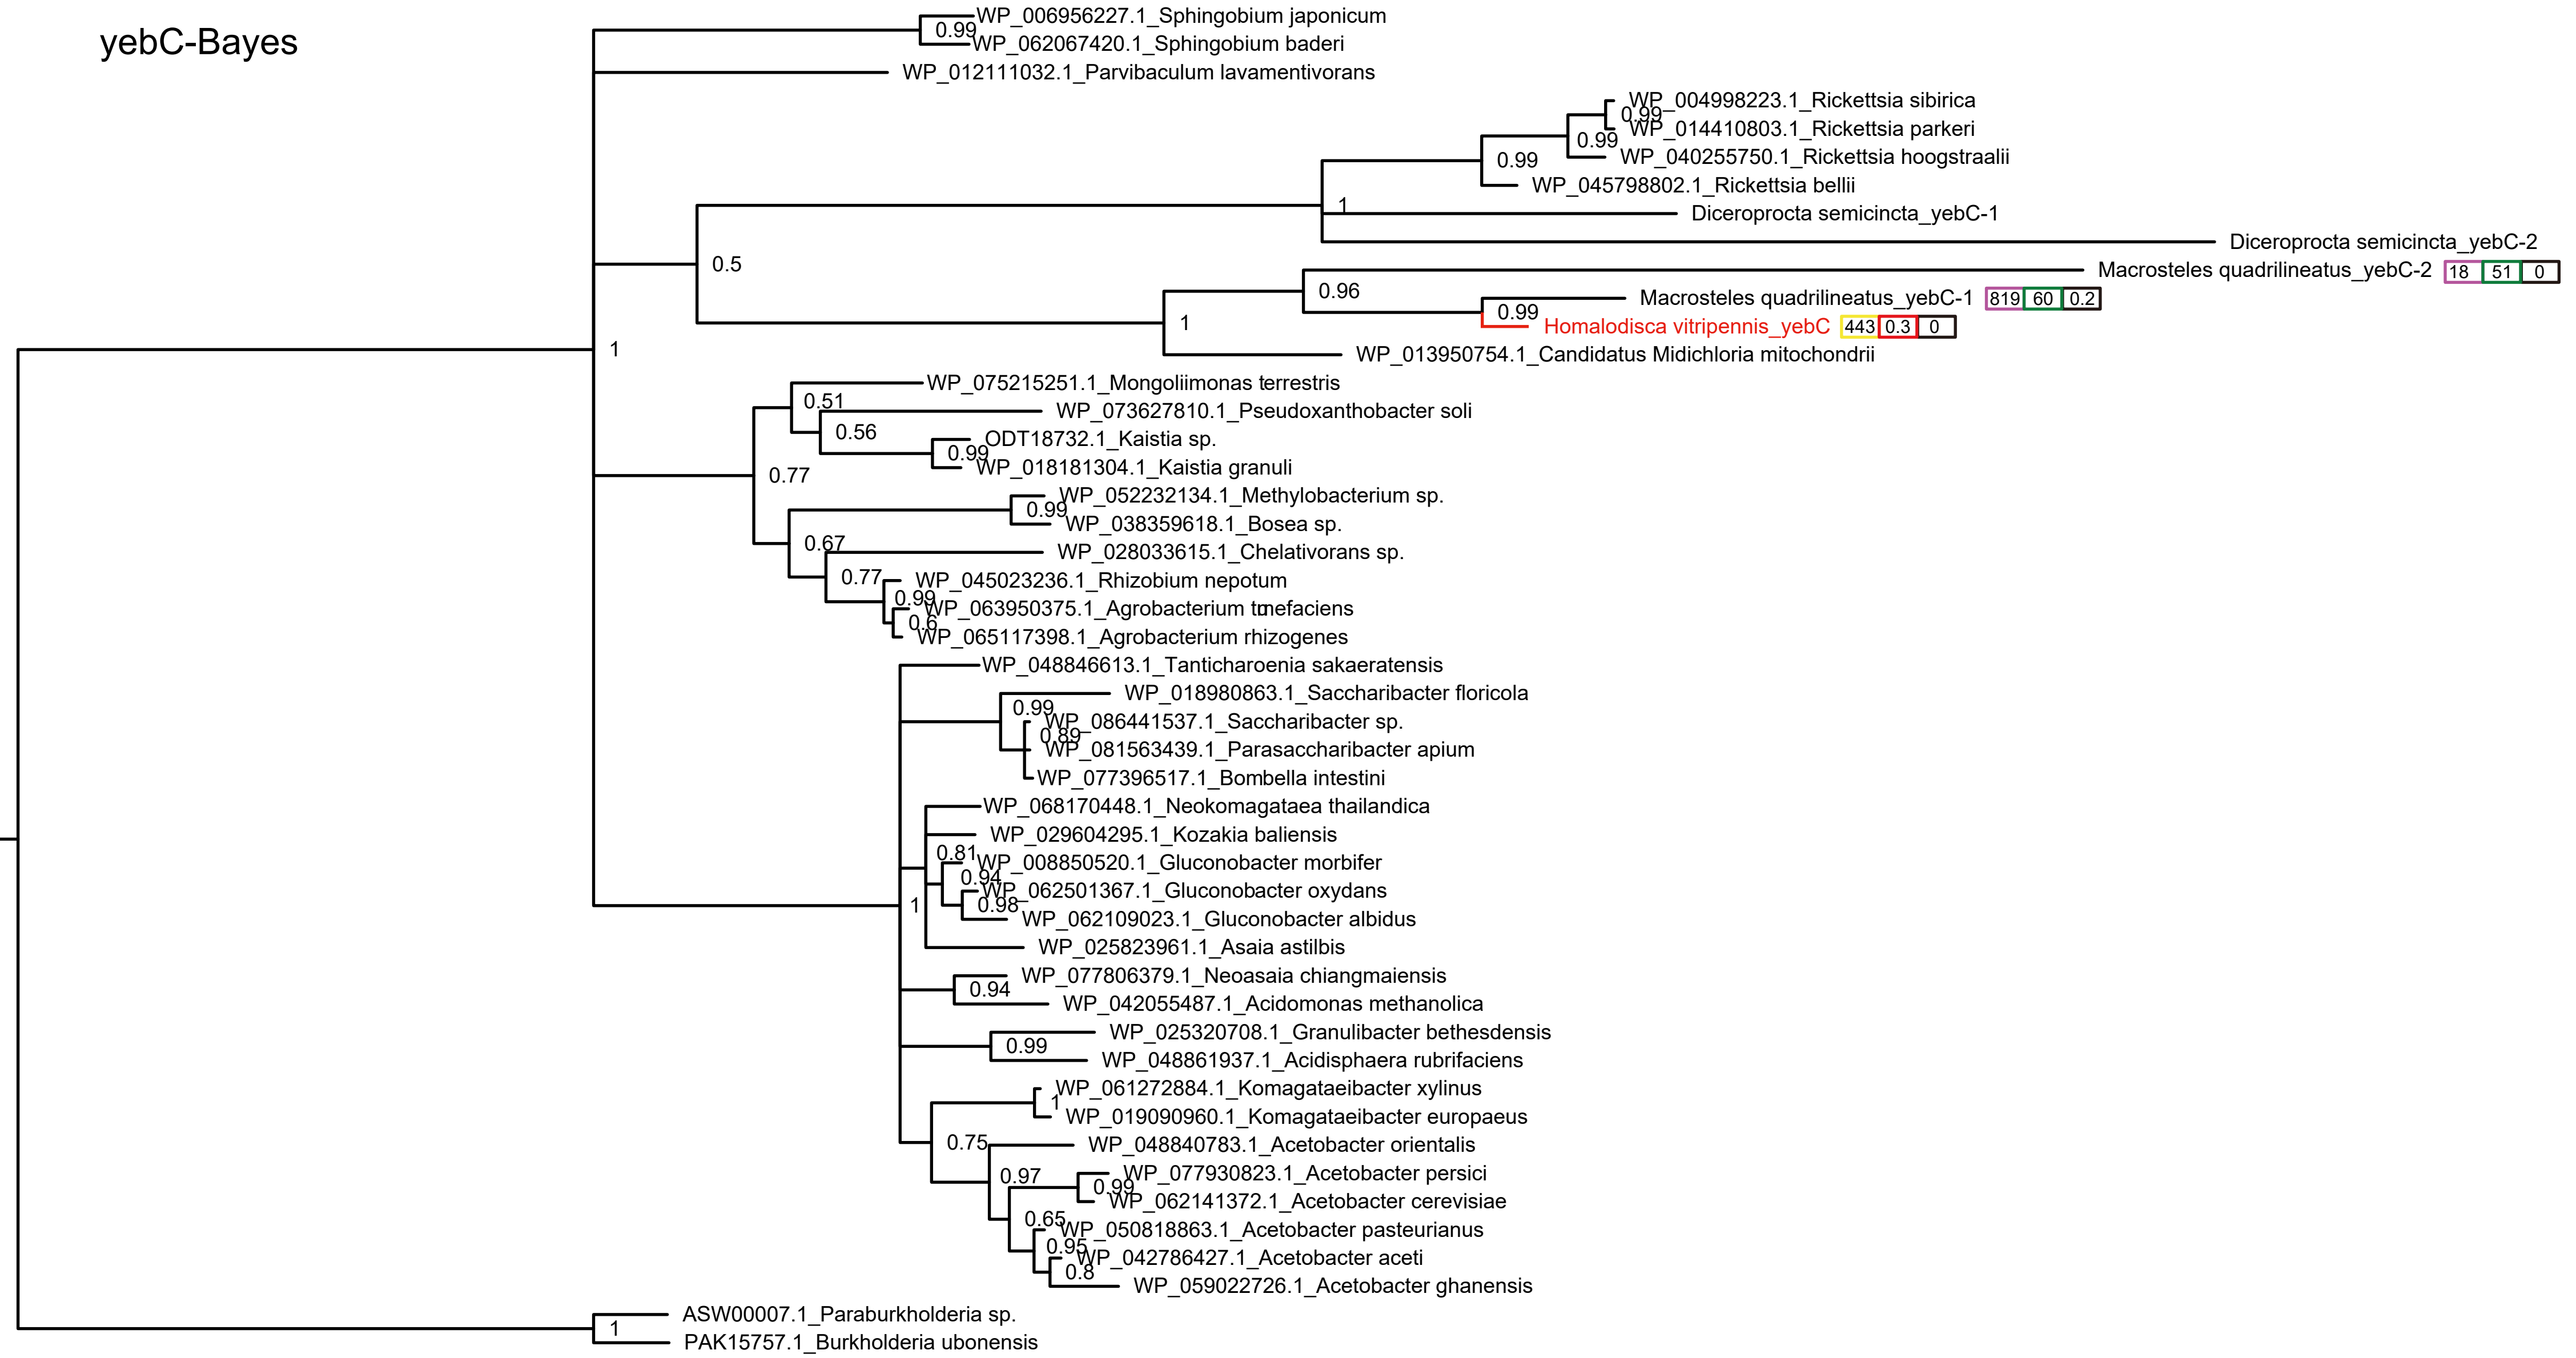

0.3

yebC-ML  
Model: WAG+I+G+F

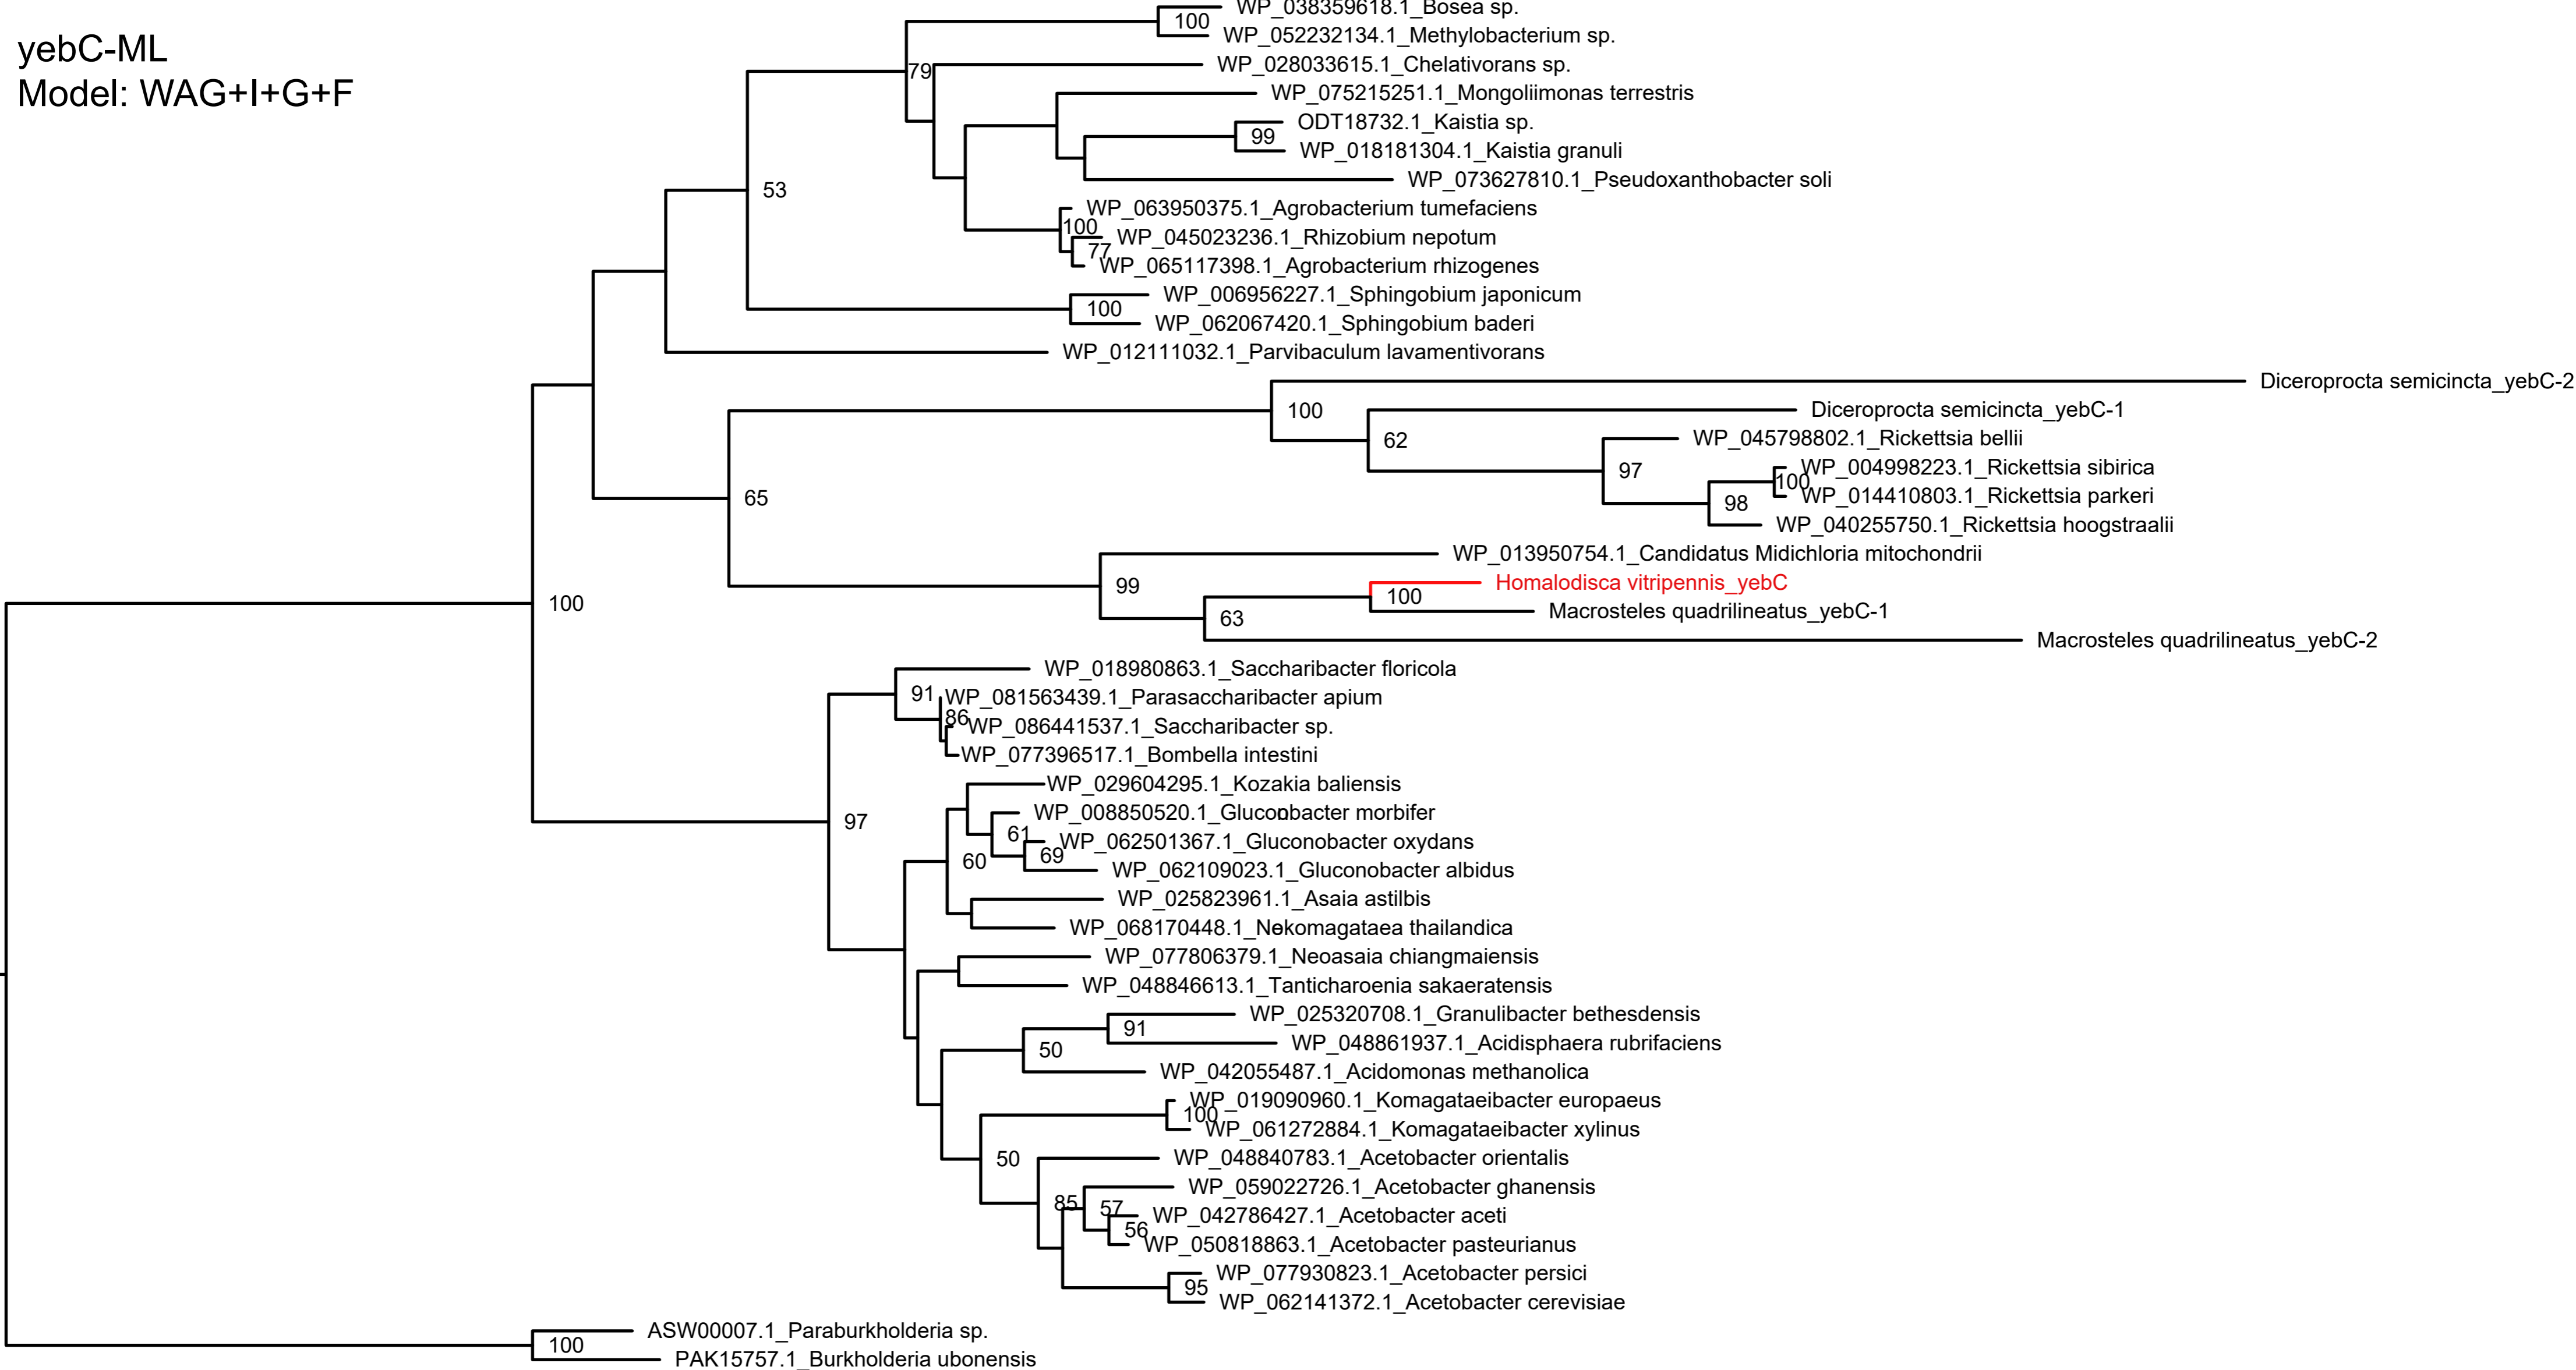

0.2

pel-Bayes

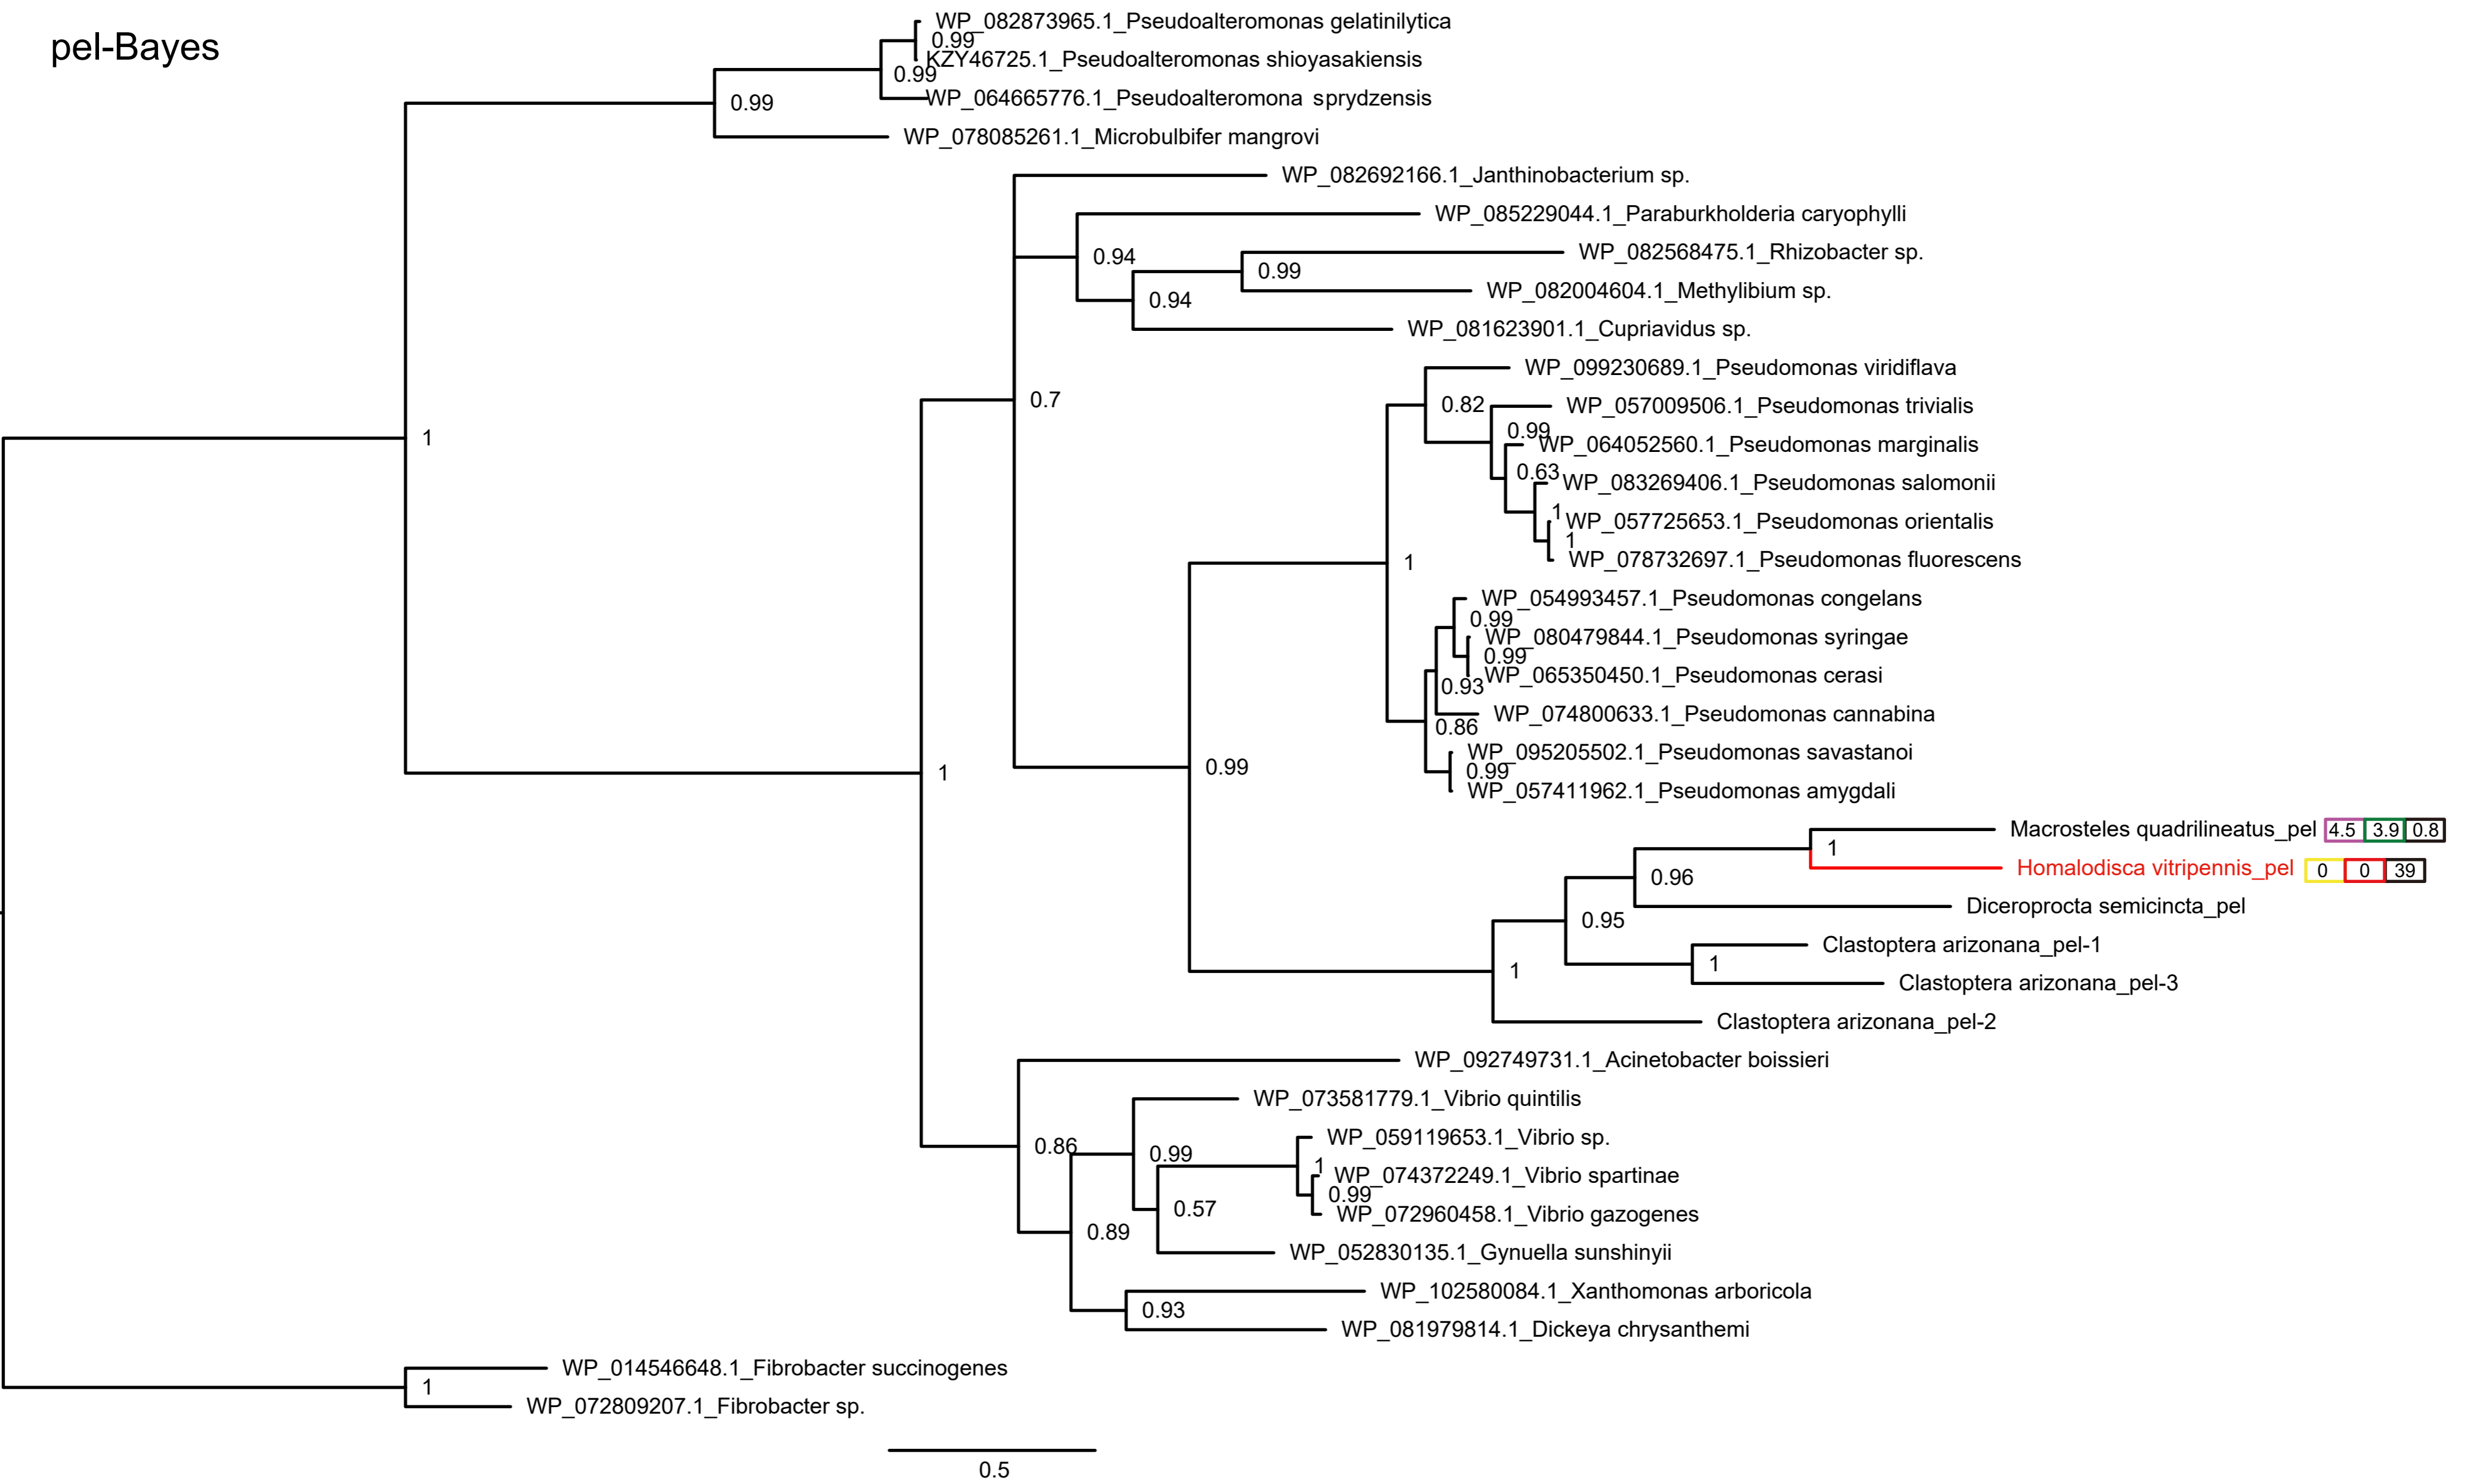

pel-ML  
Model: WAG+I+G

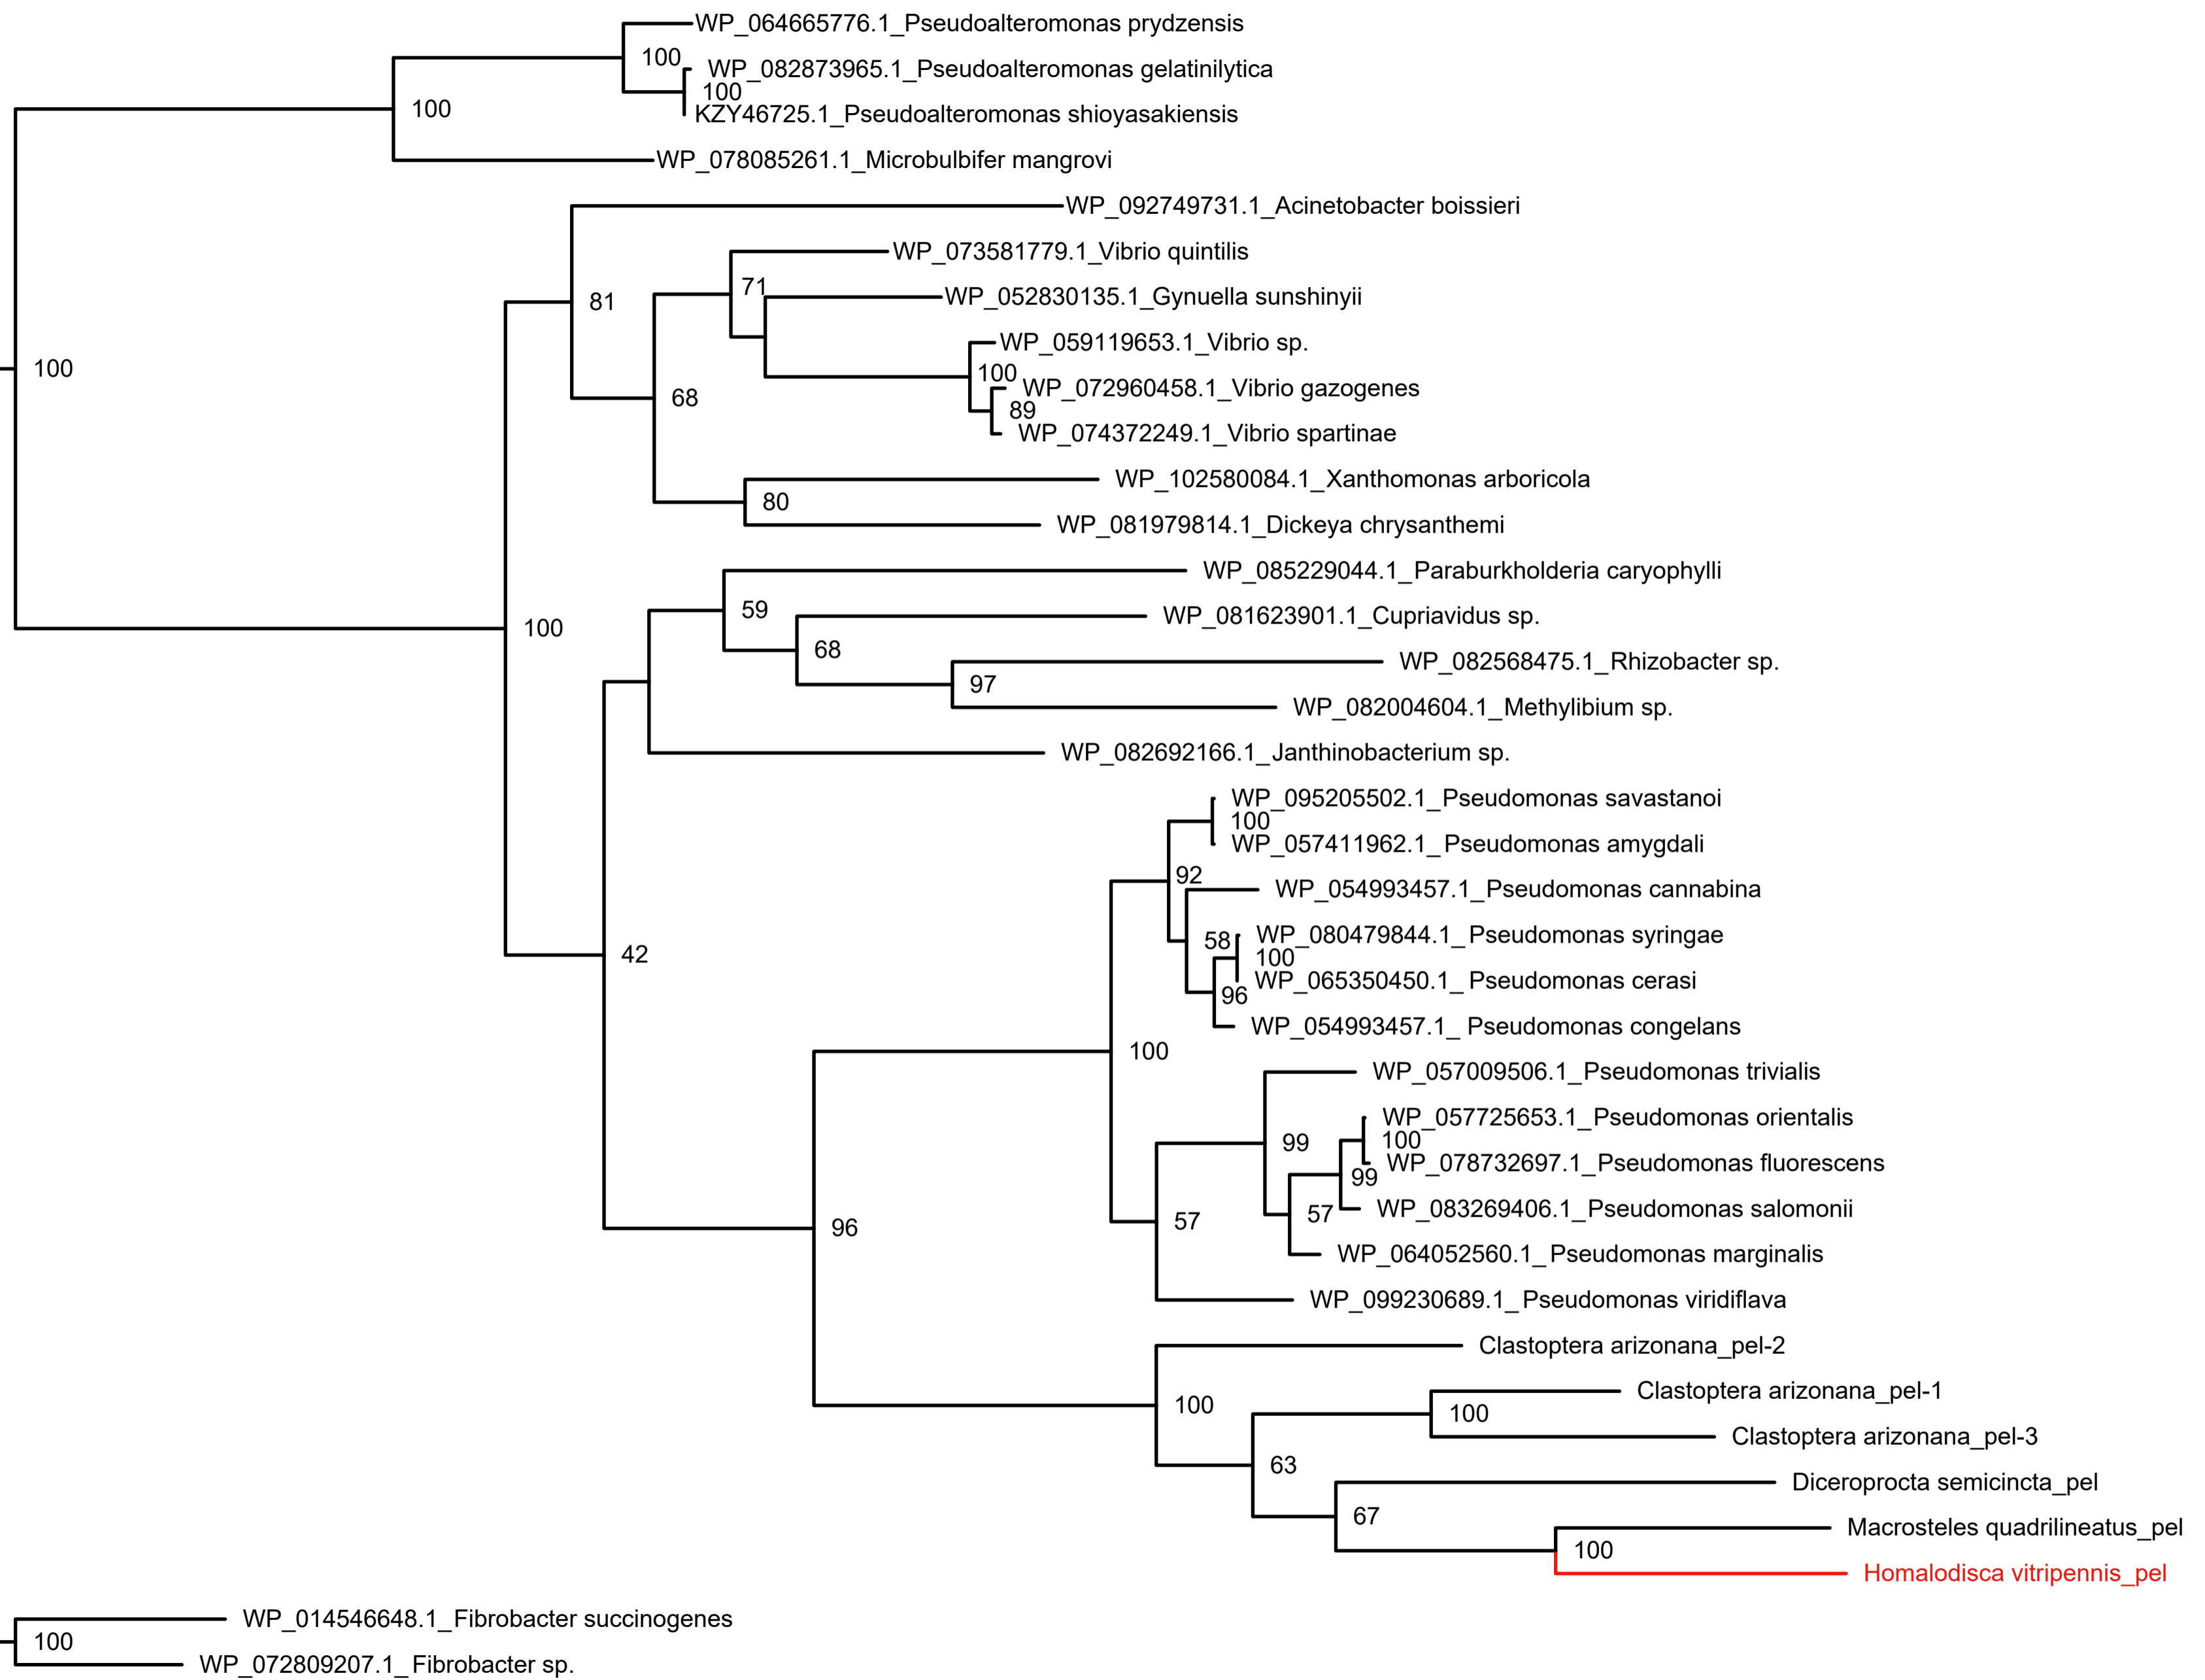

0.4

# gh25-Bayes

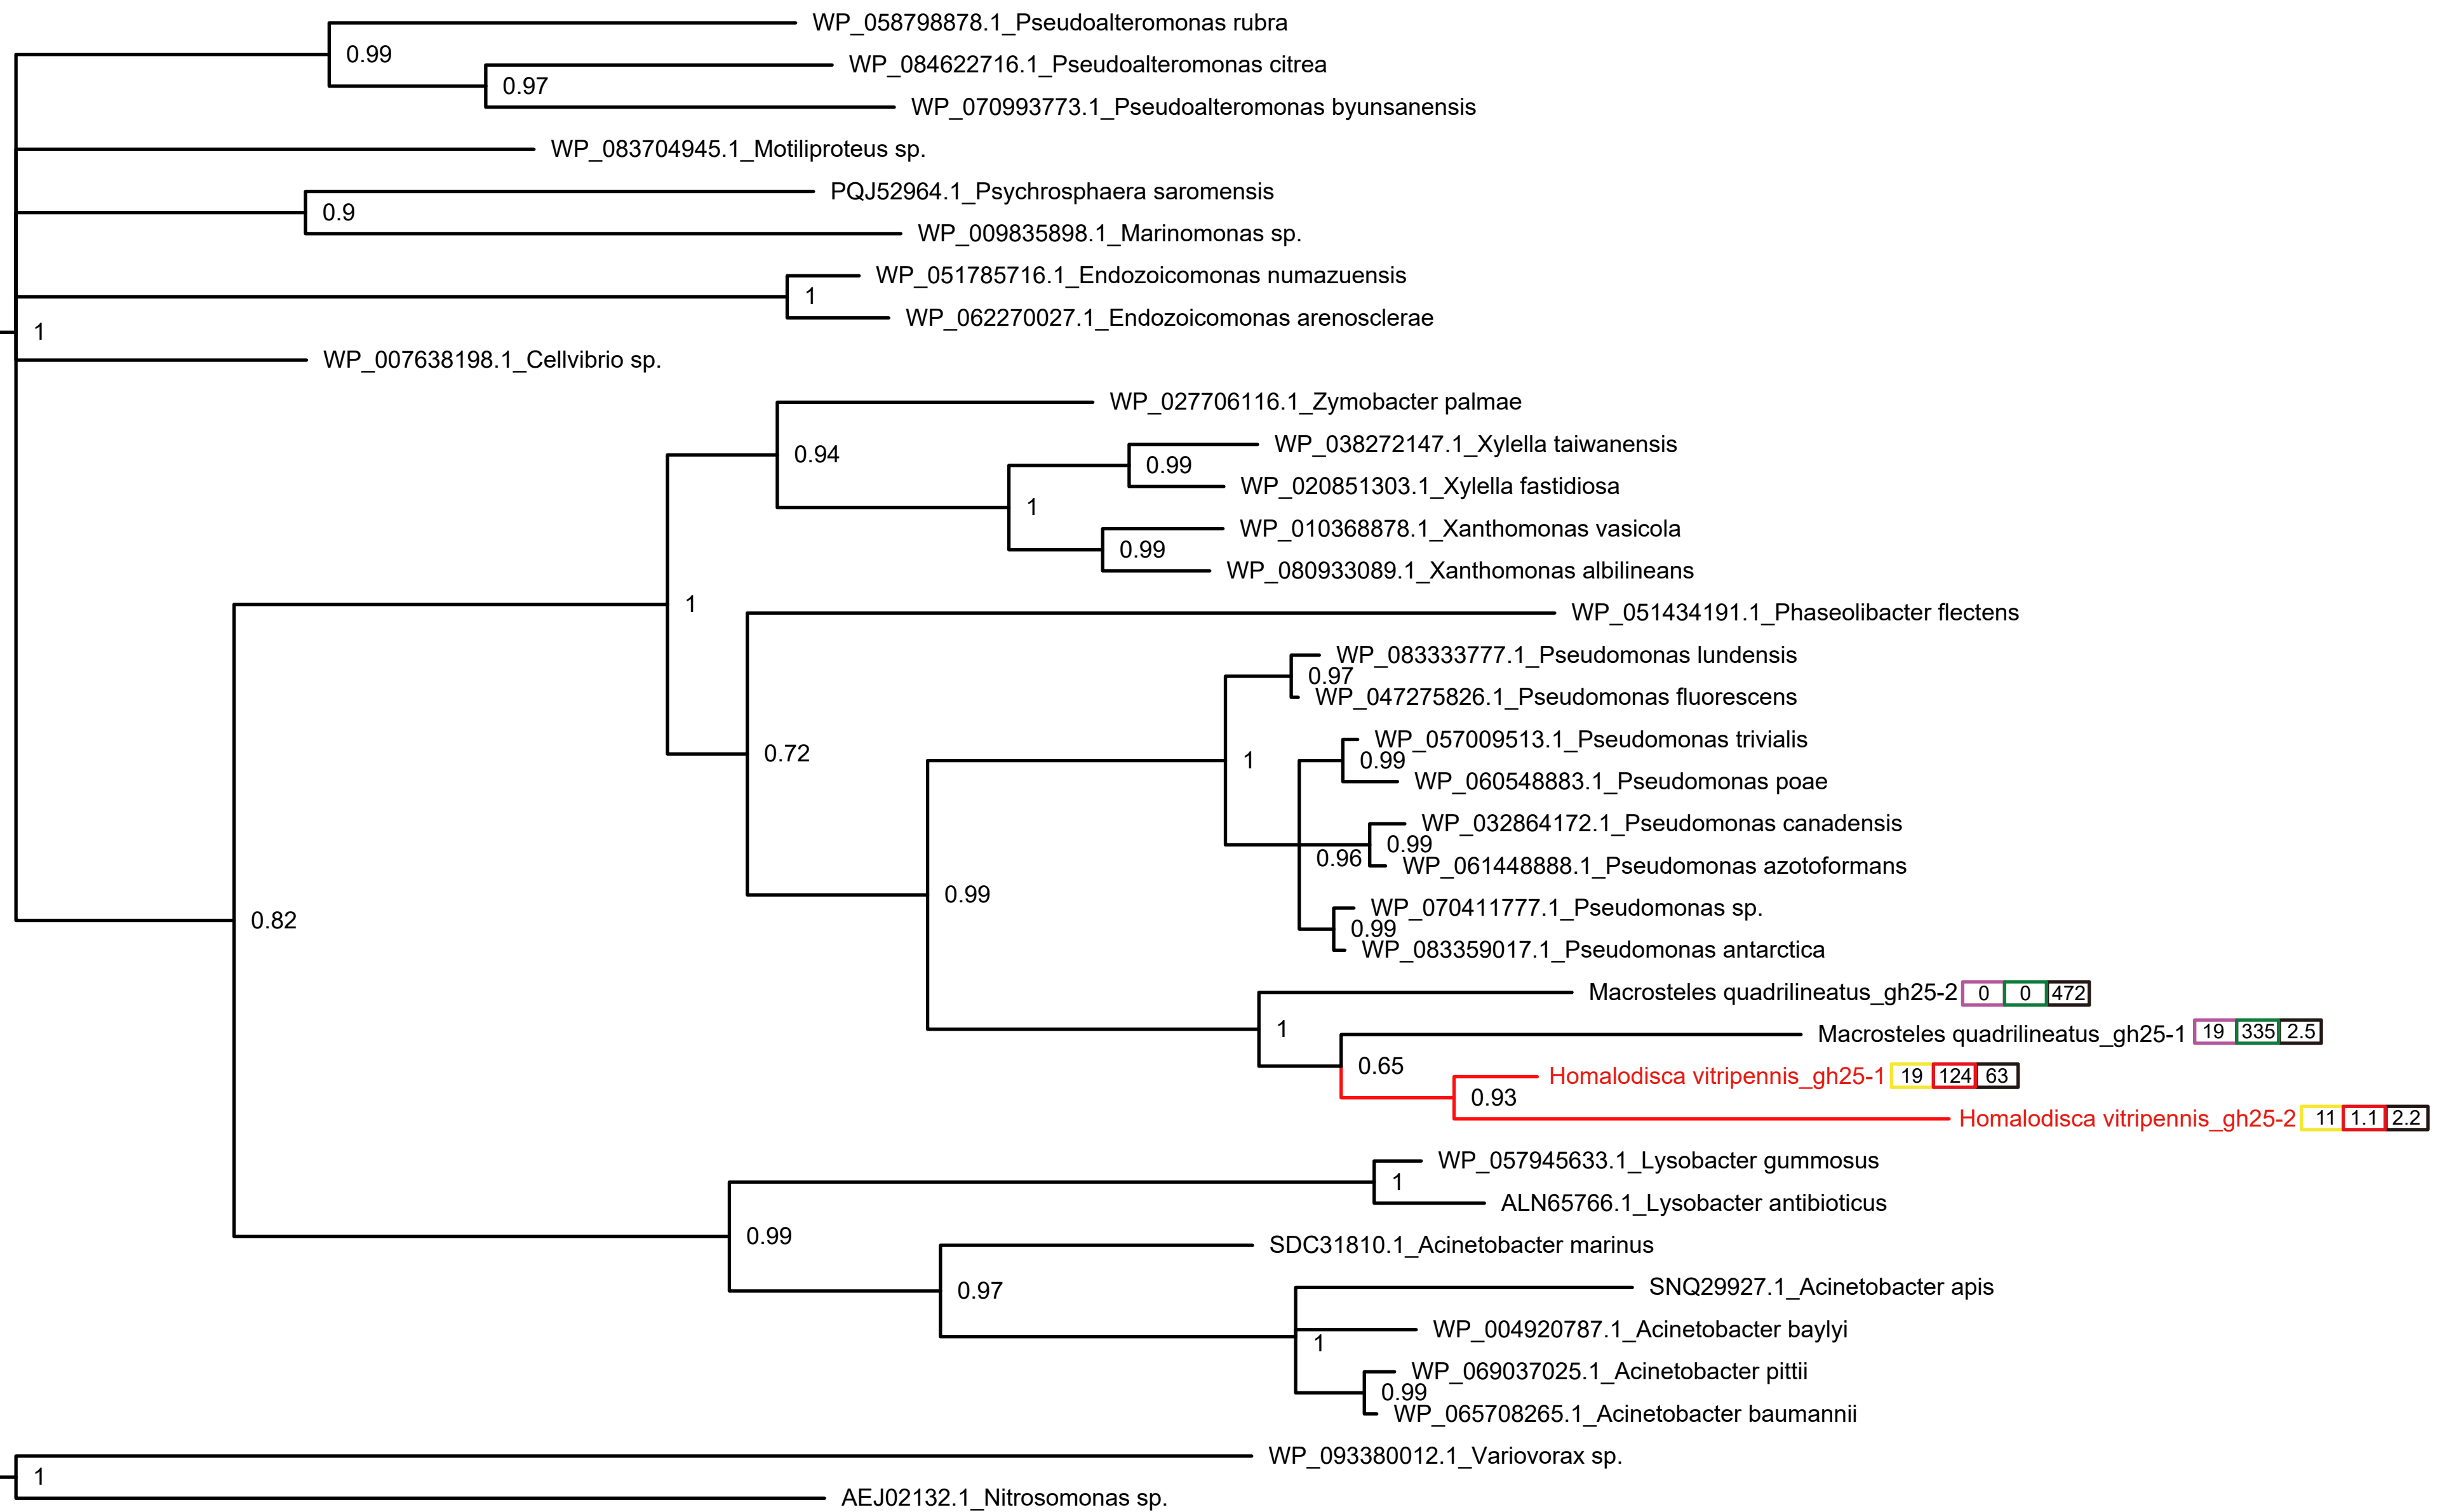

0.4

gh25-ML  
Model: WAG+I+G

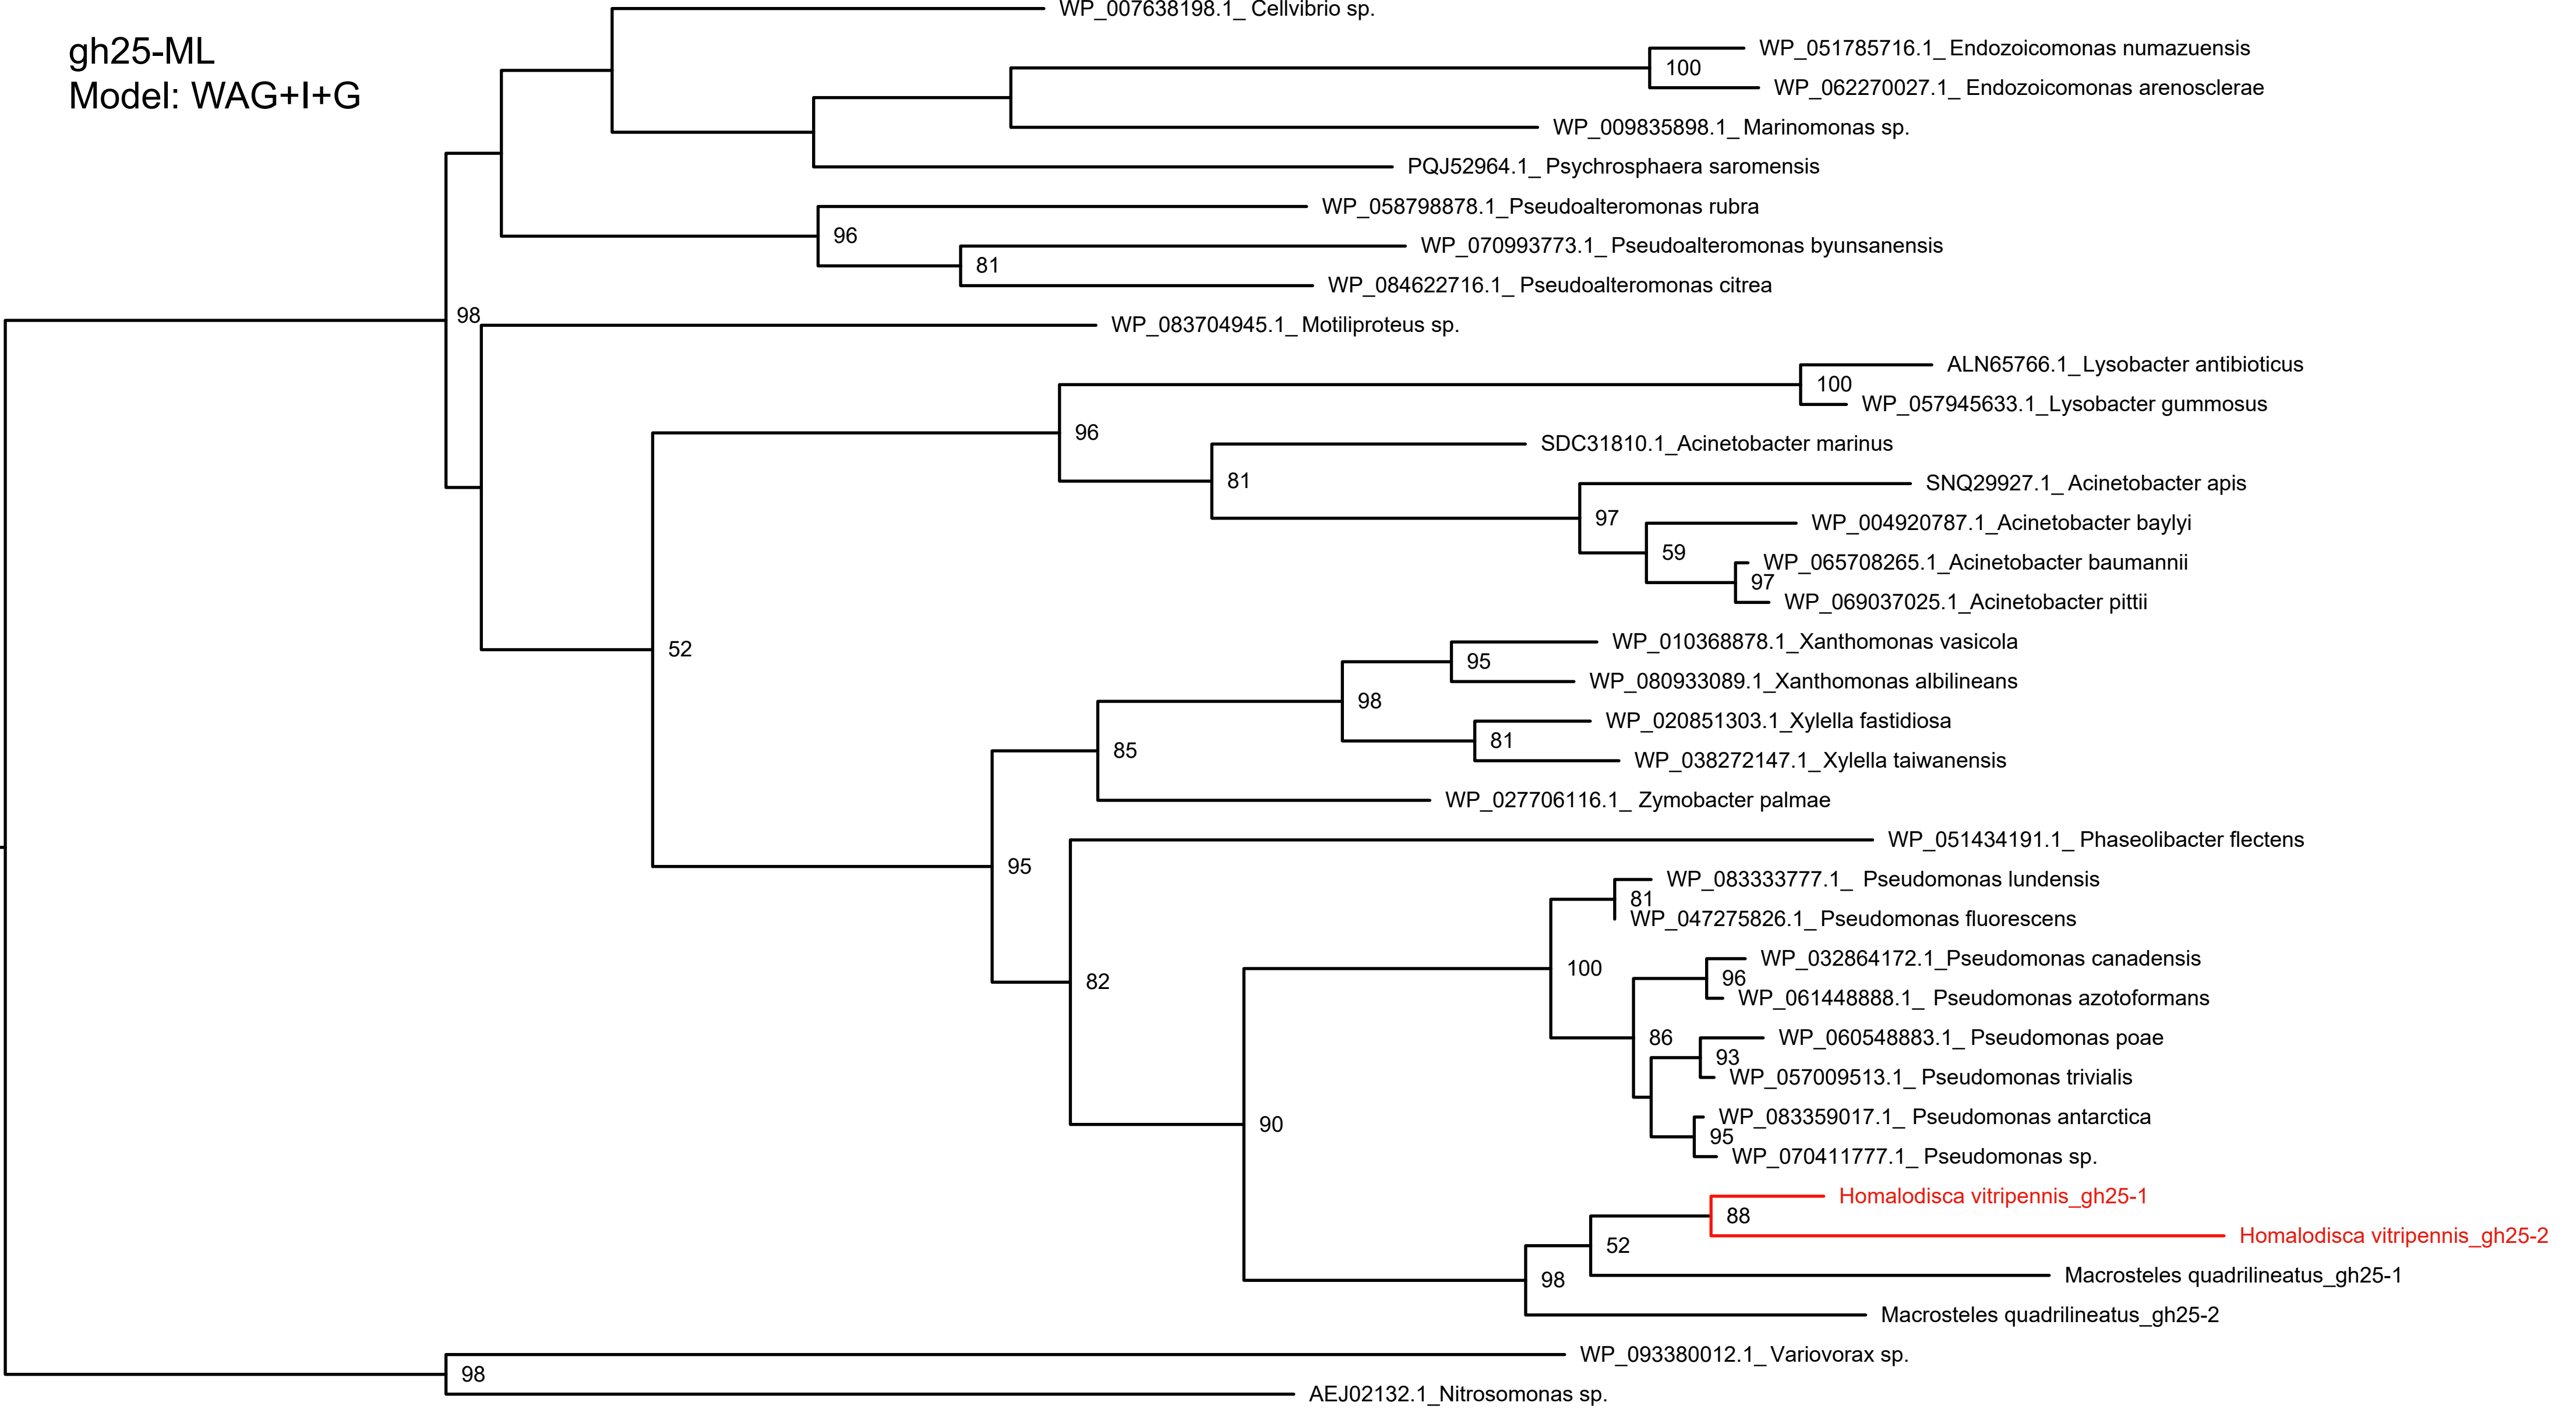

0.4

cel-Bayes

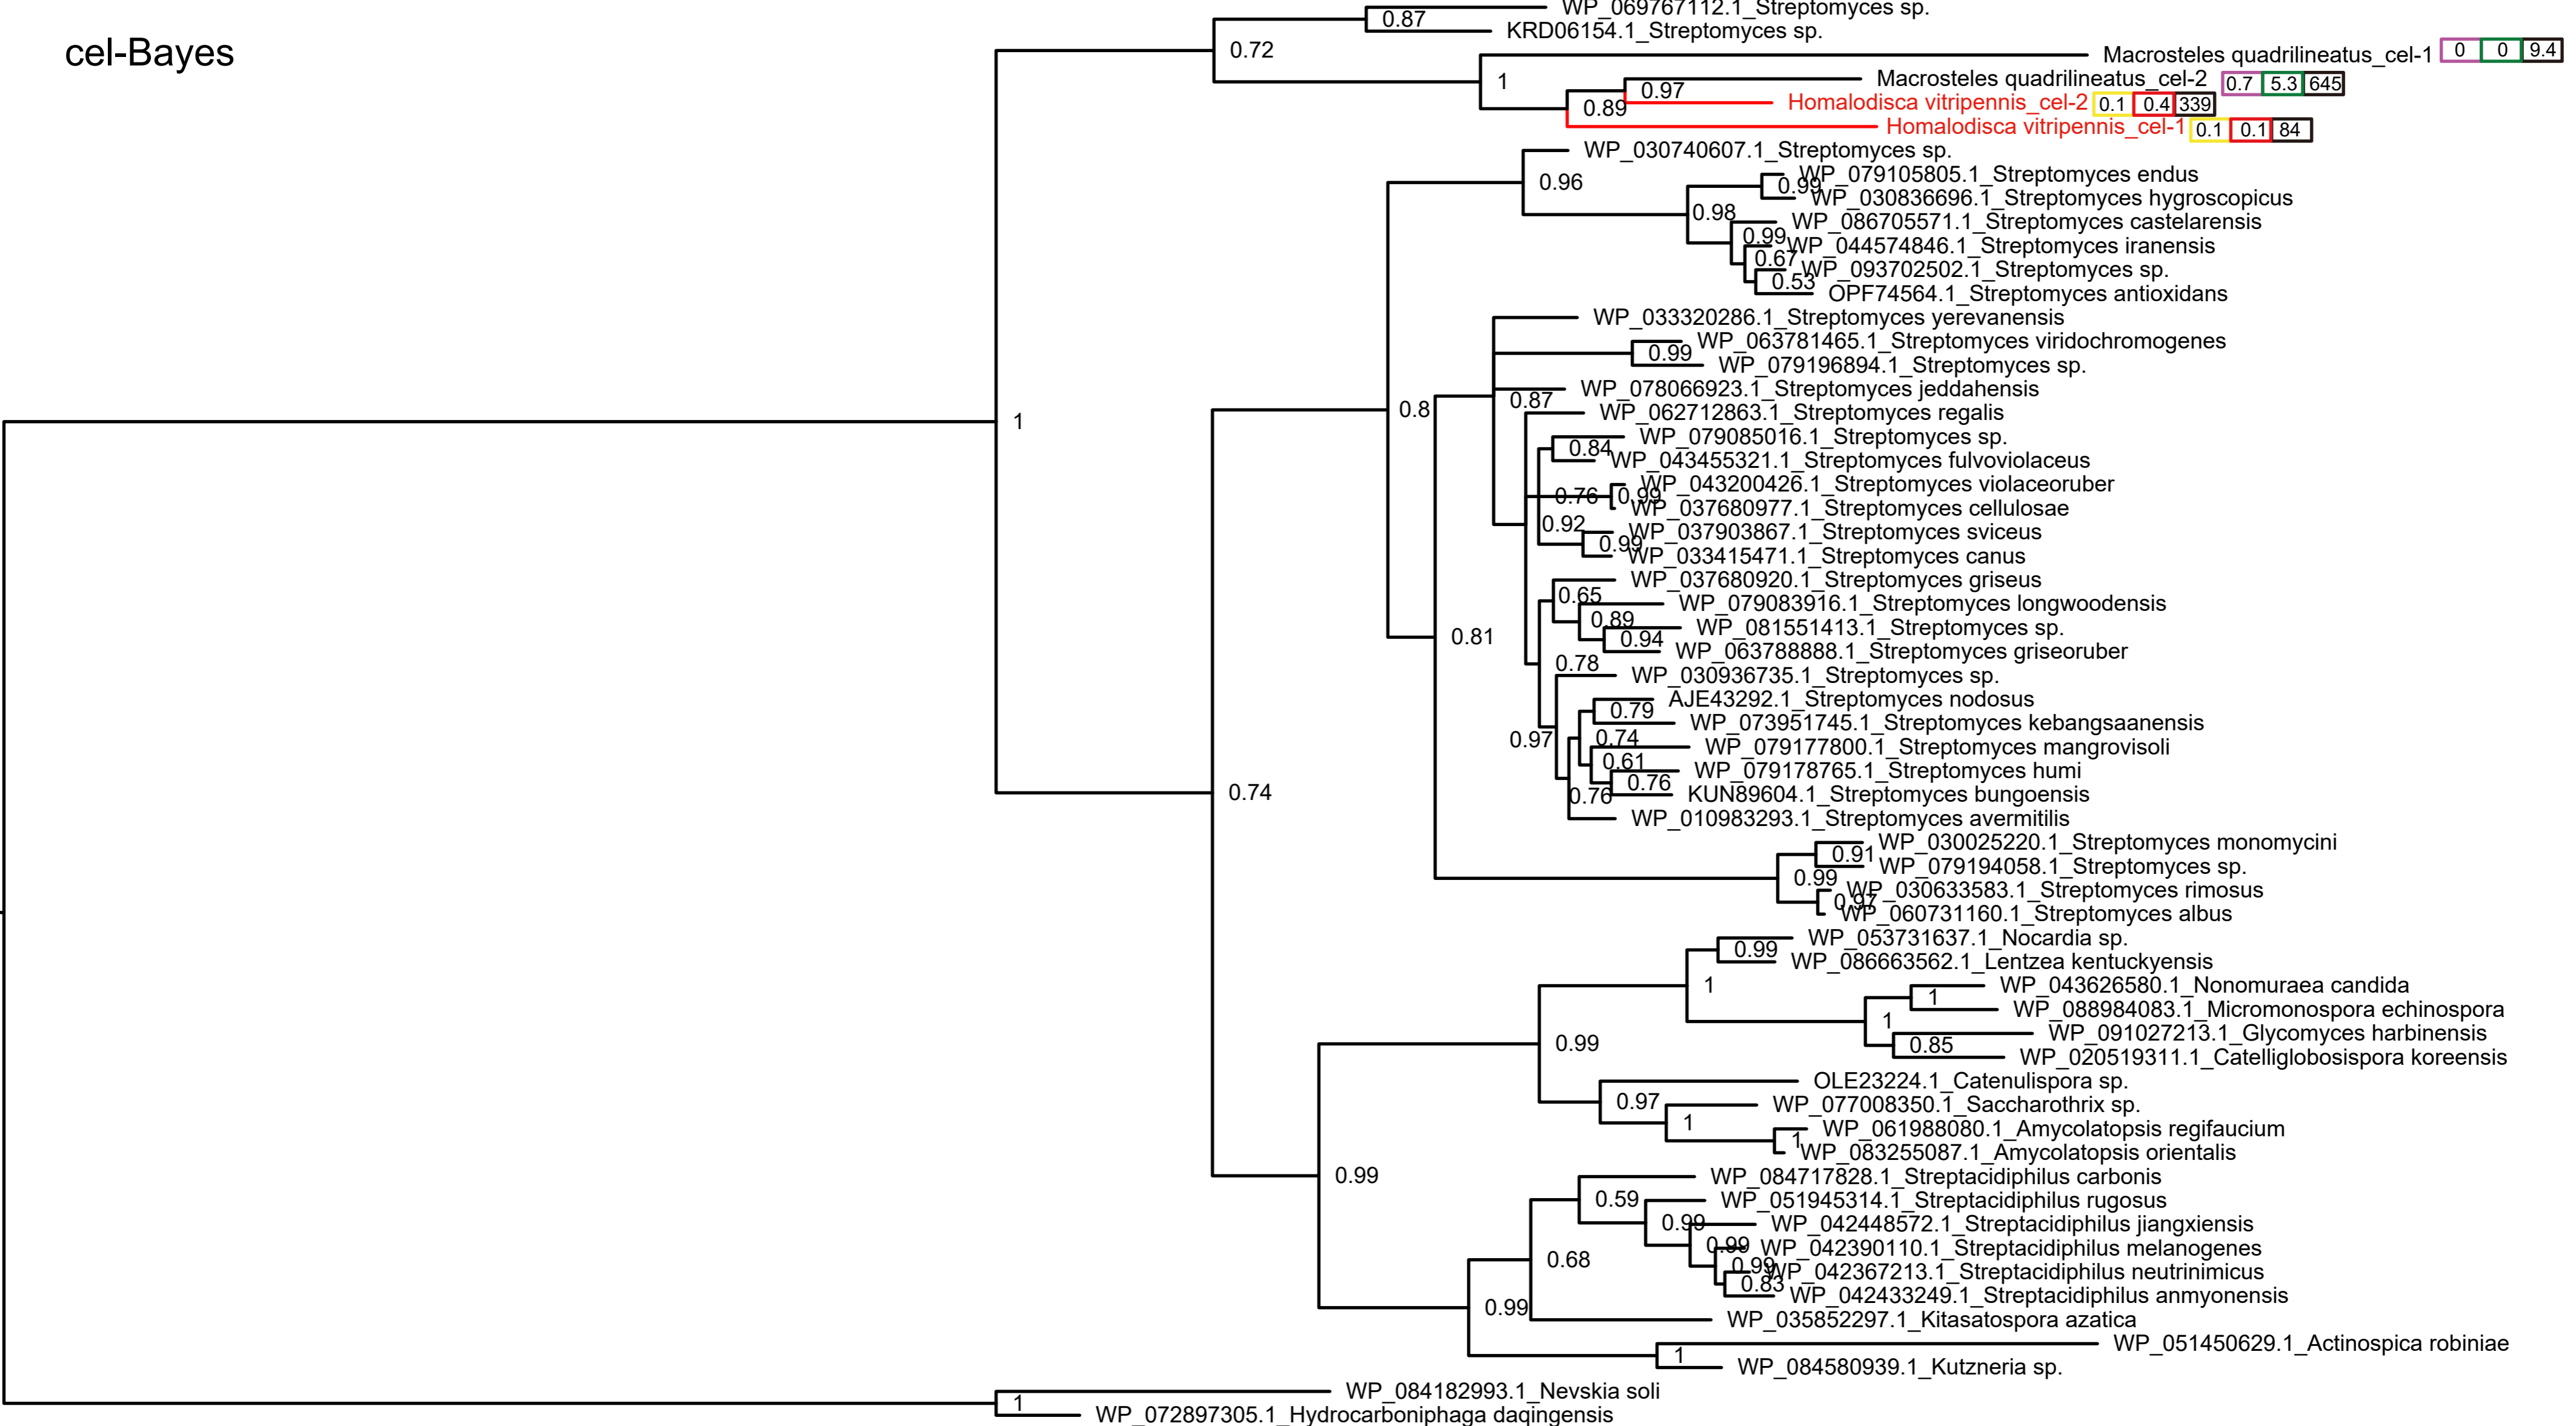

0.4



cel-ML

Model: WAG+I+G+F

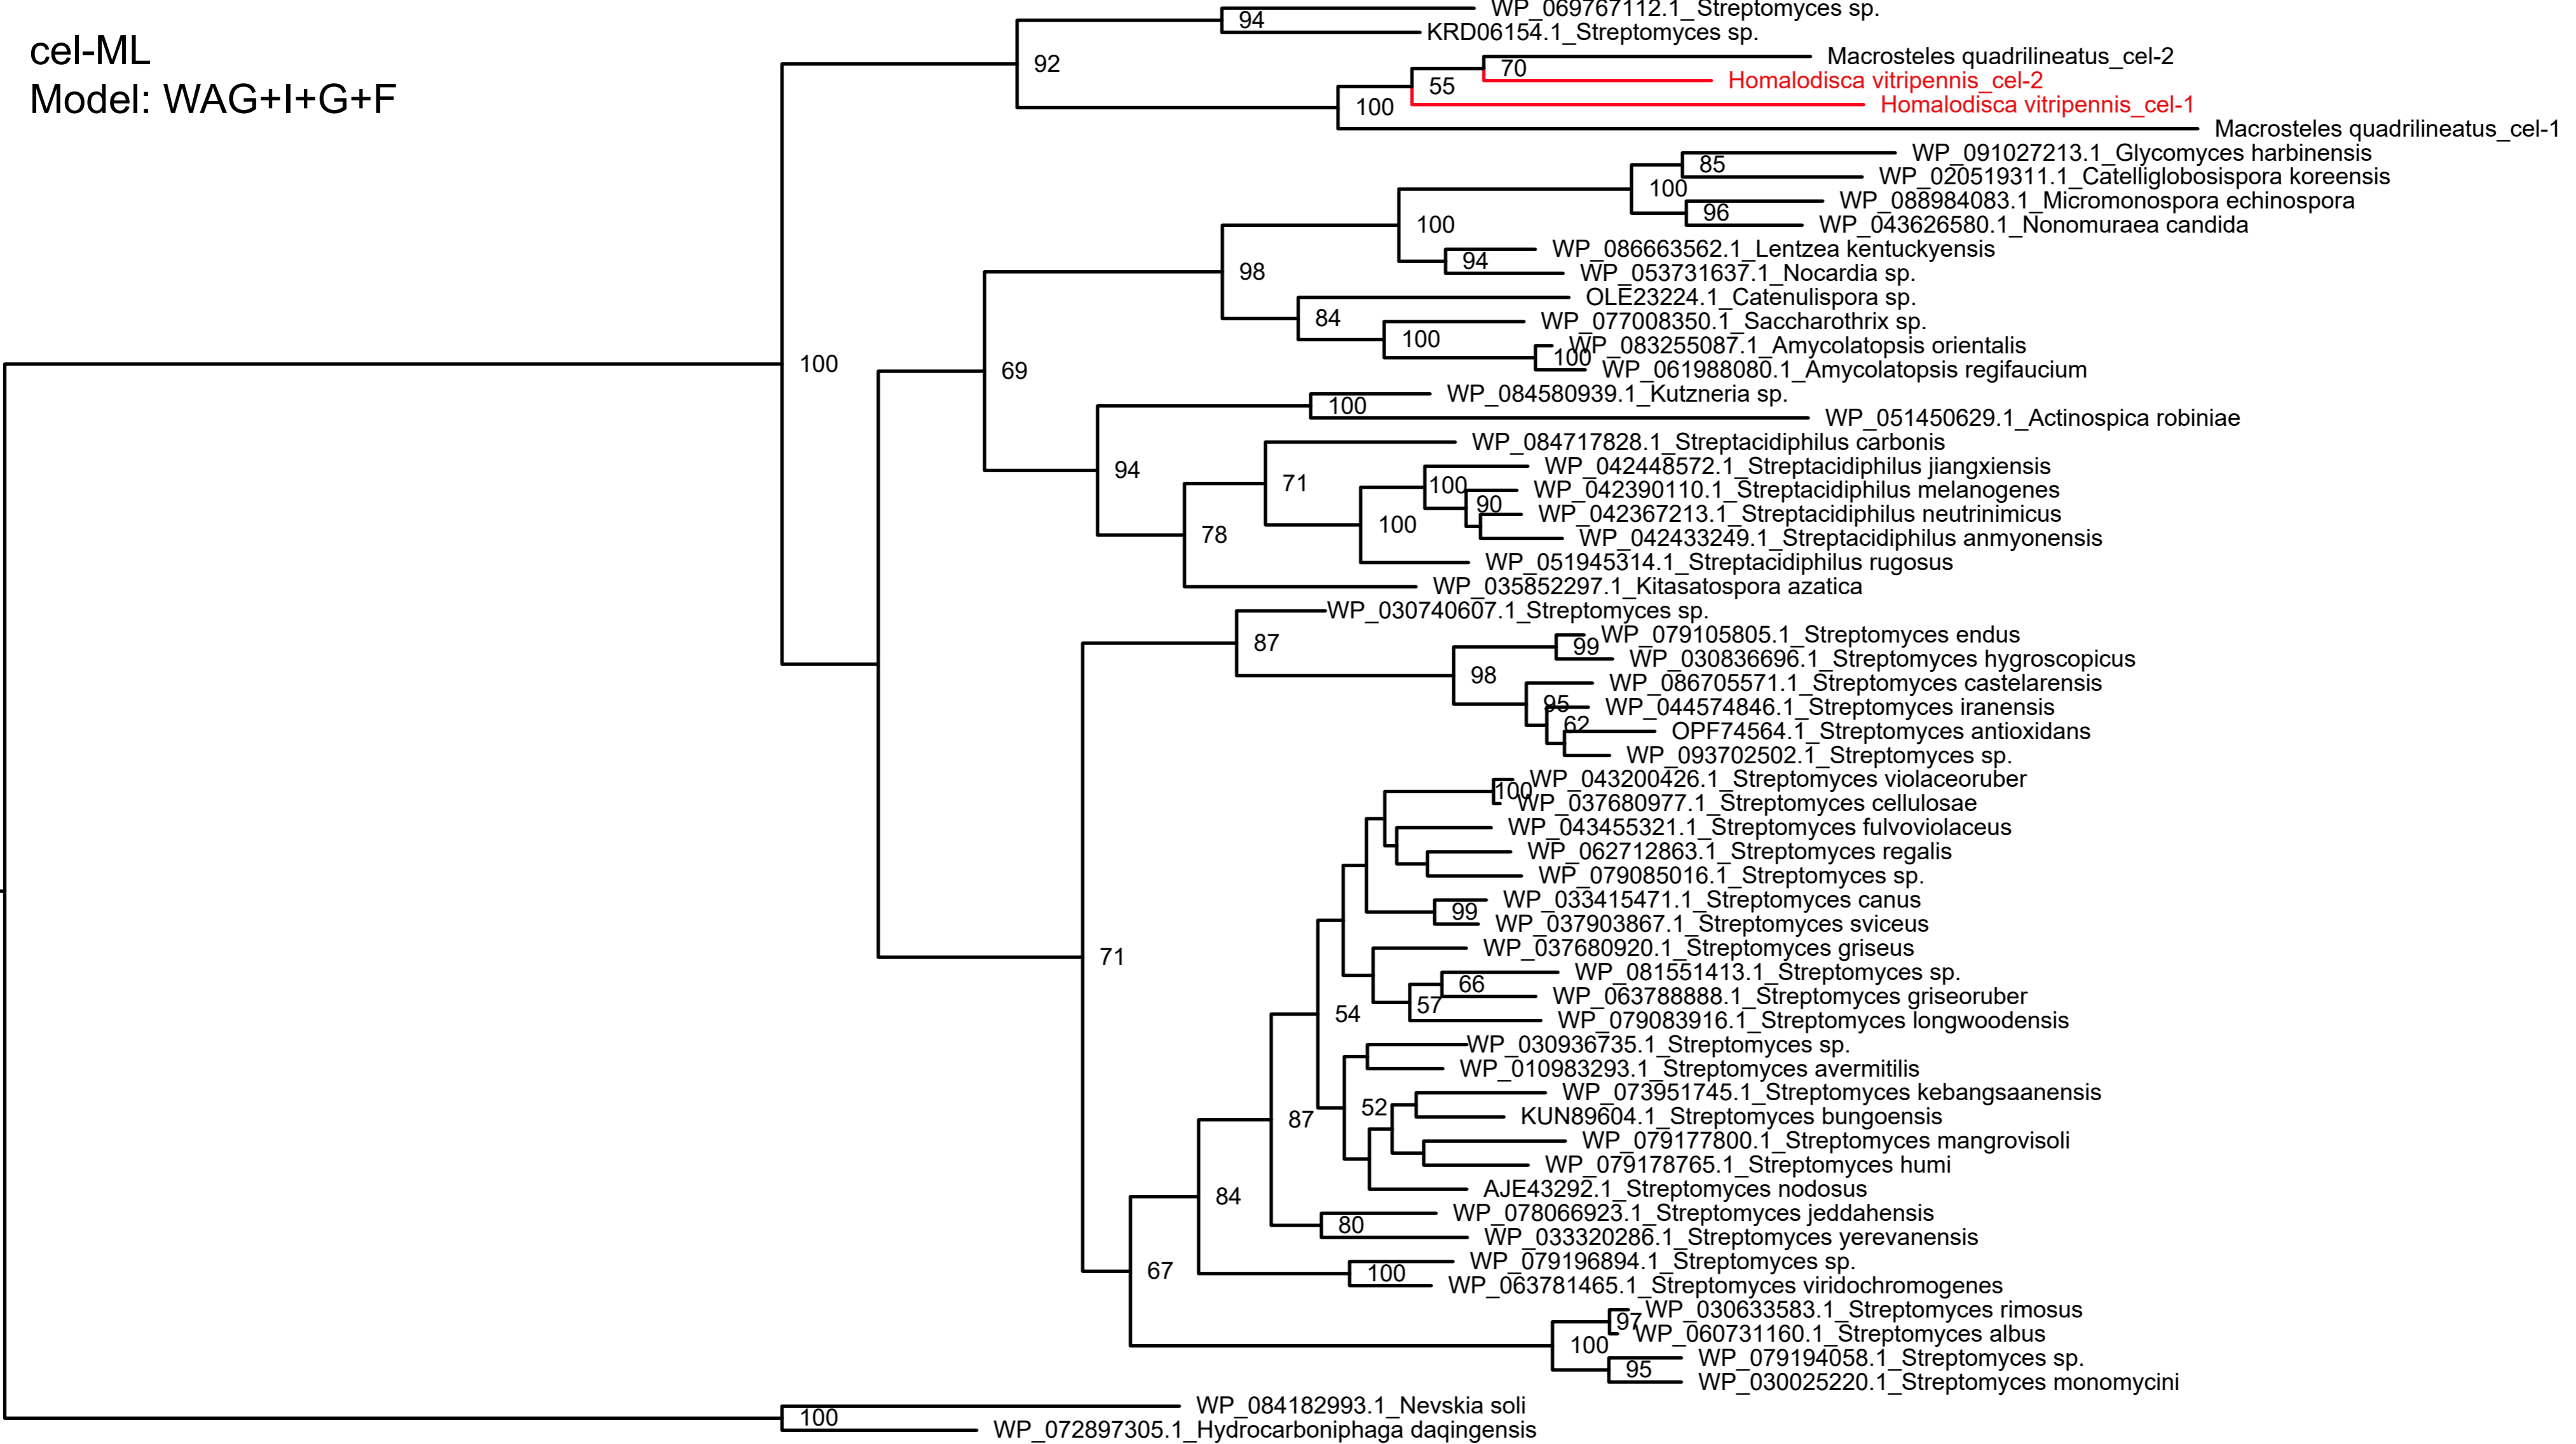

0.2

# plc-Bayes

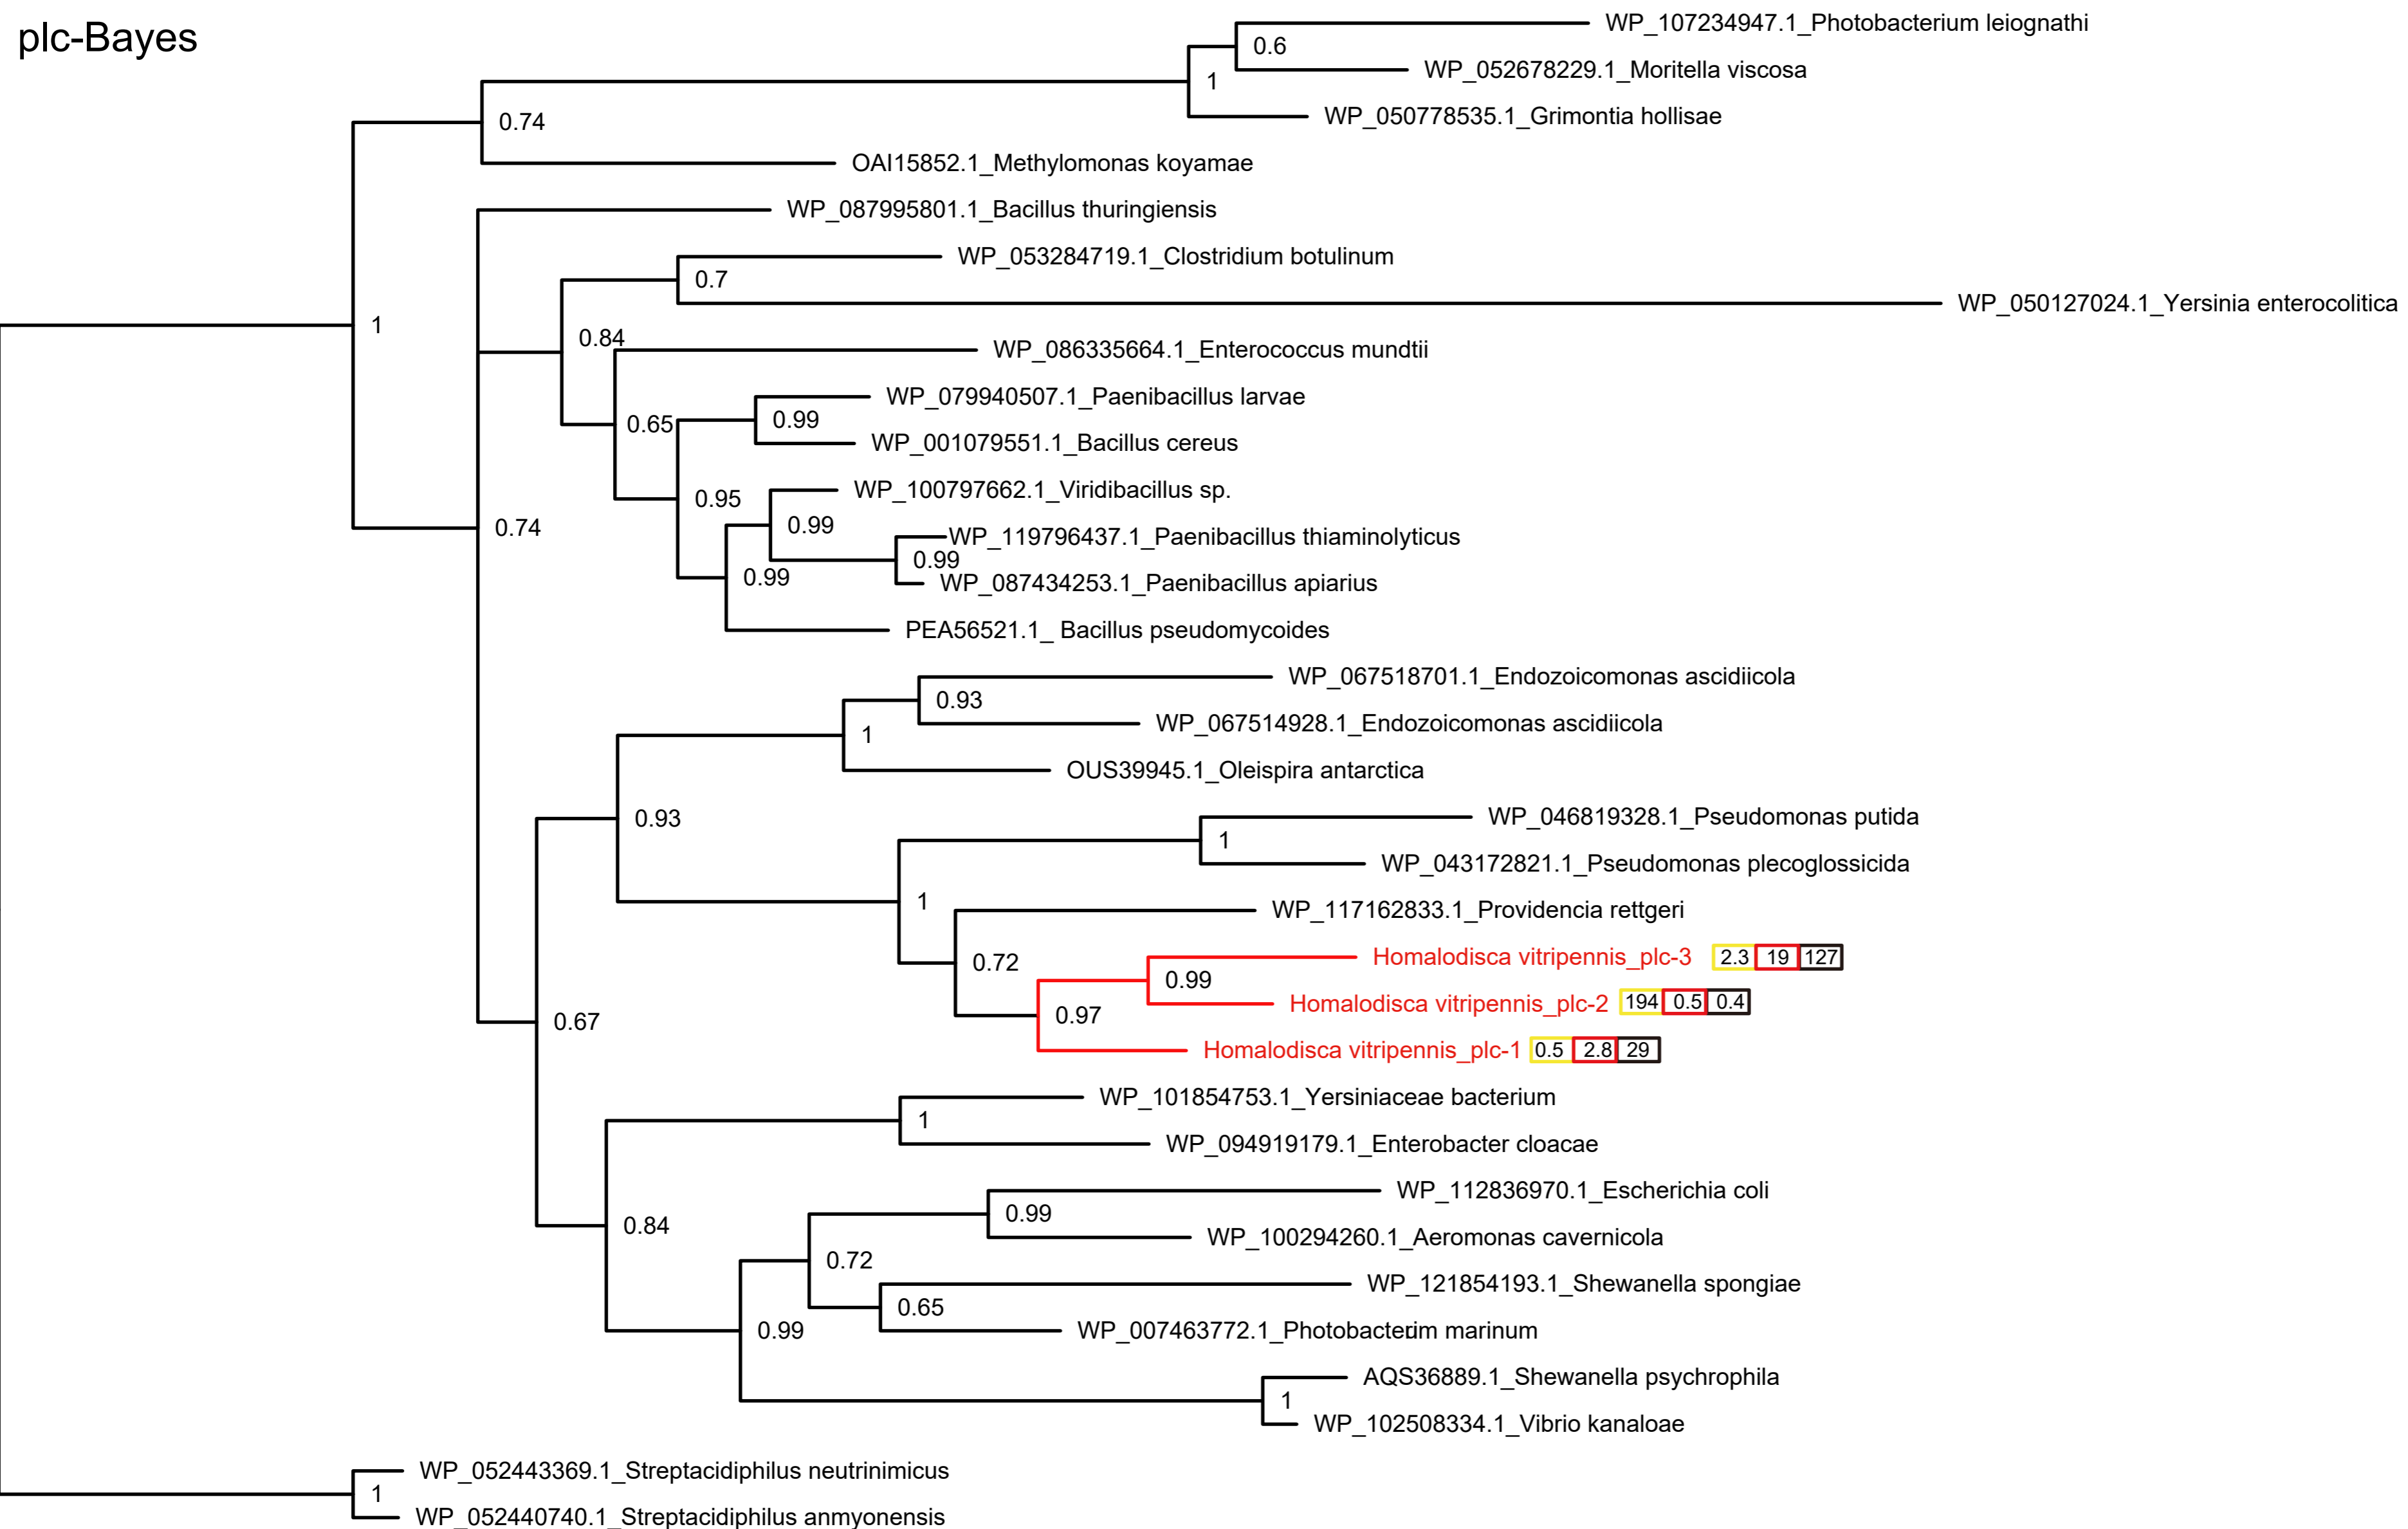

0.4

plc-ML  
Model: WAG+I+G+F

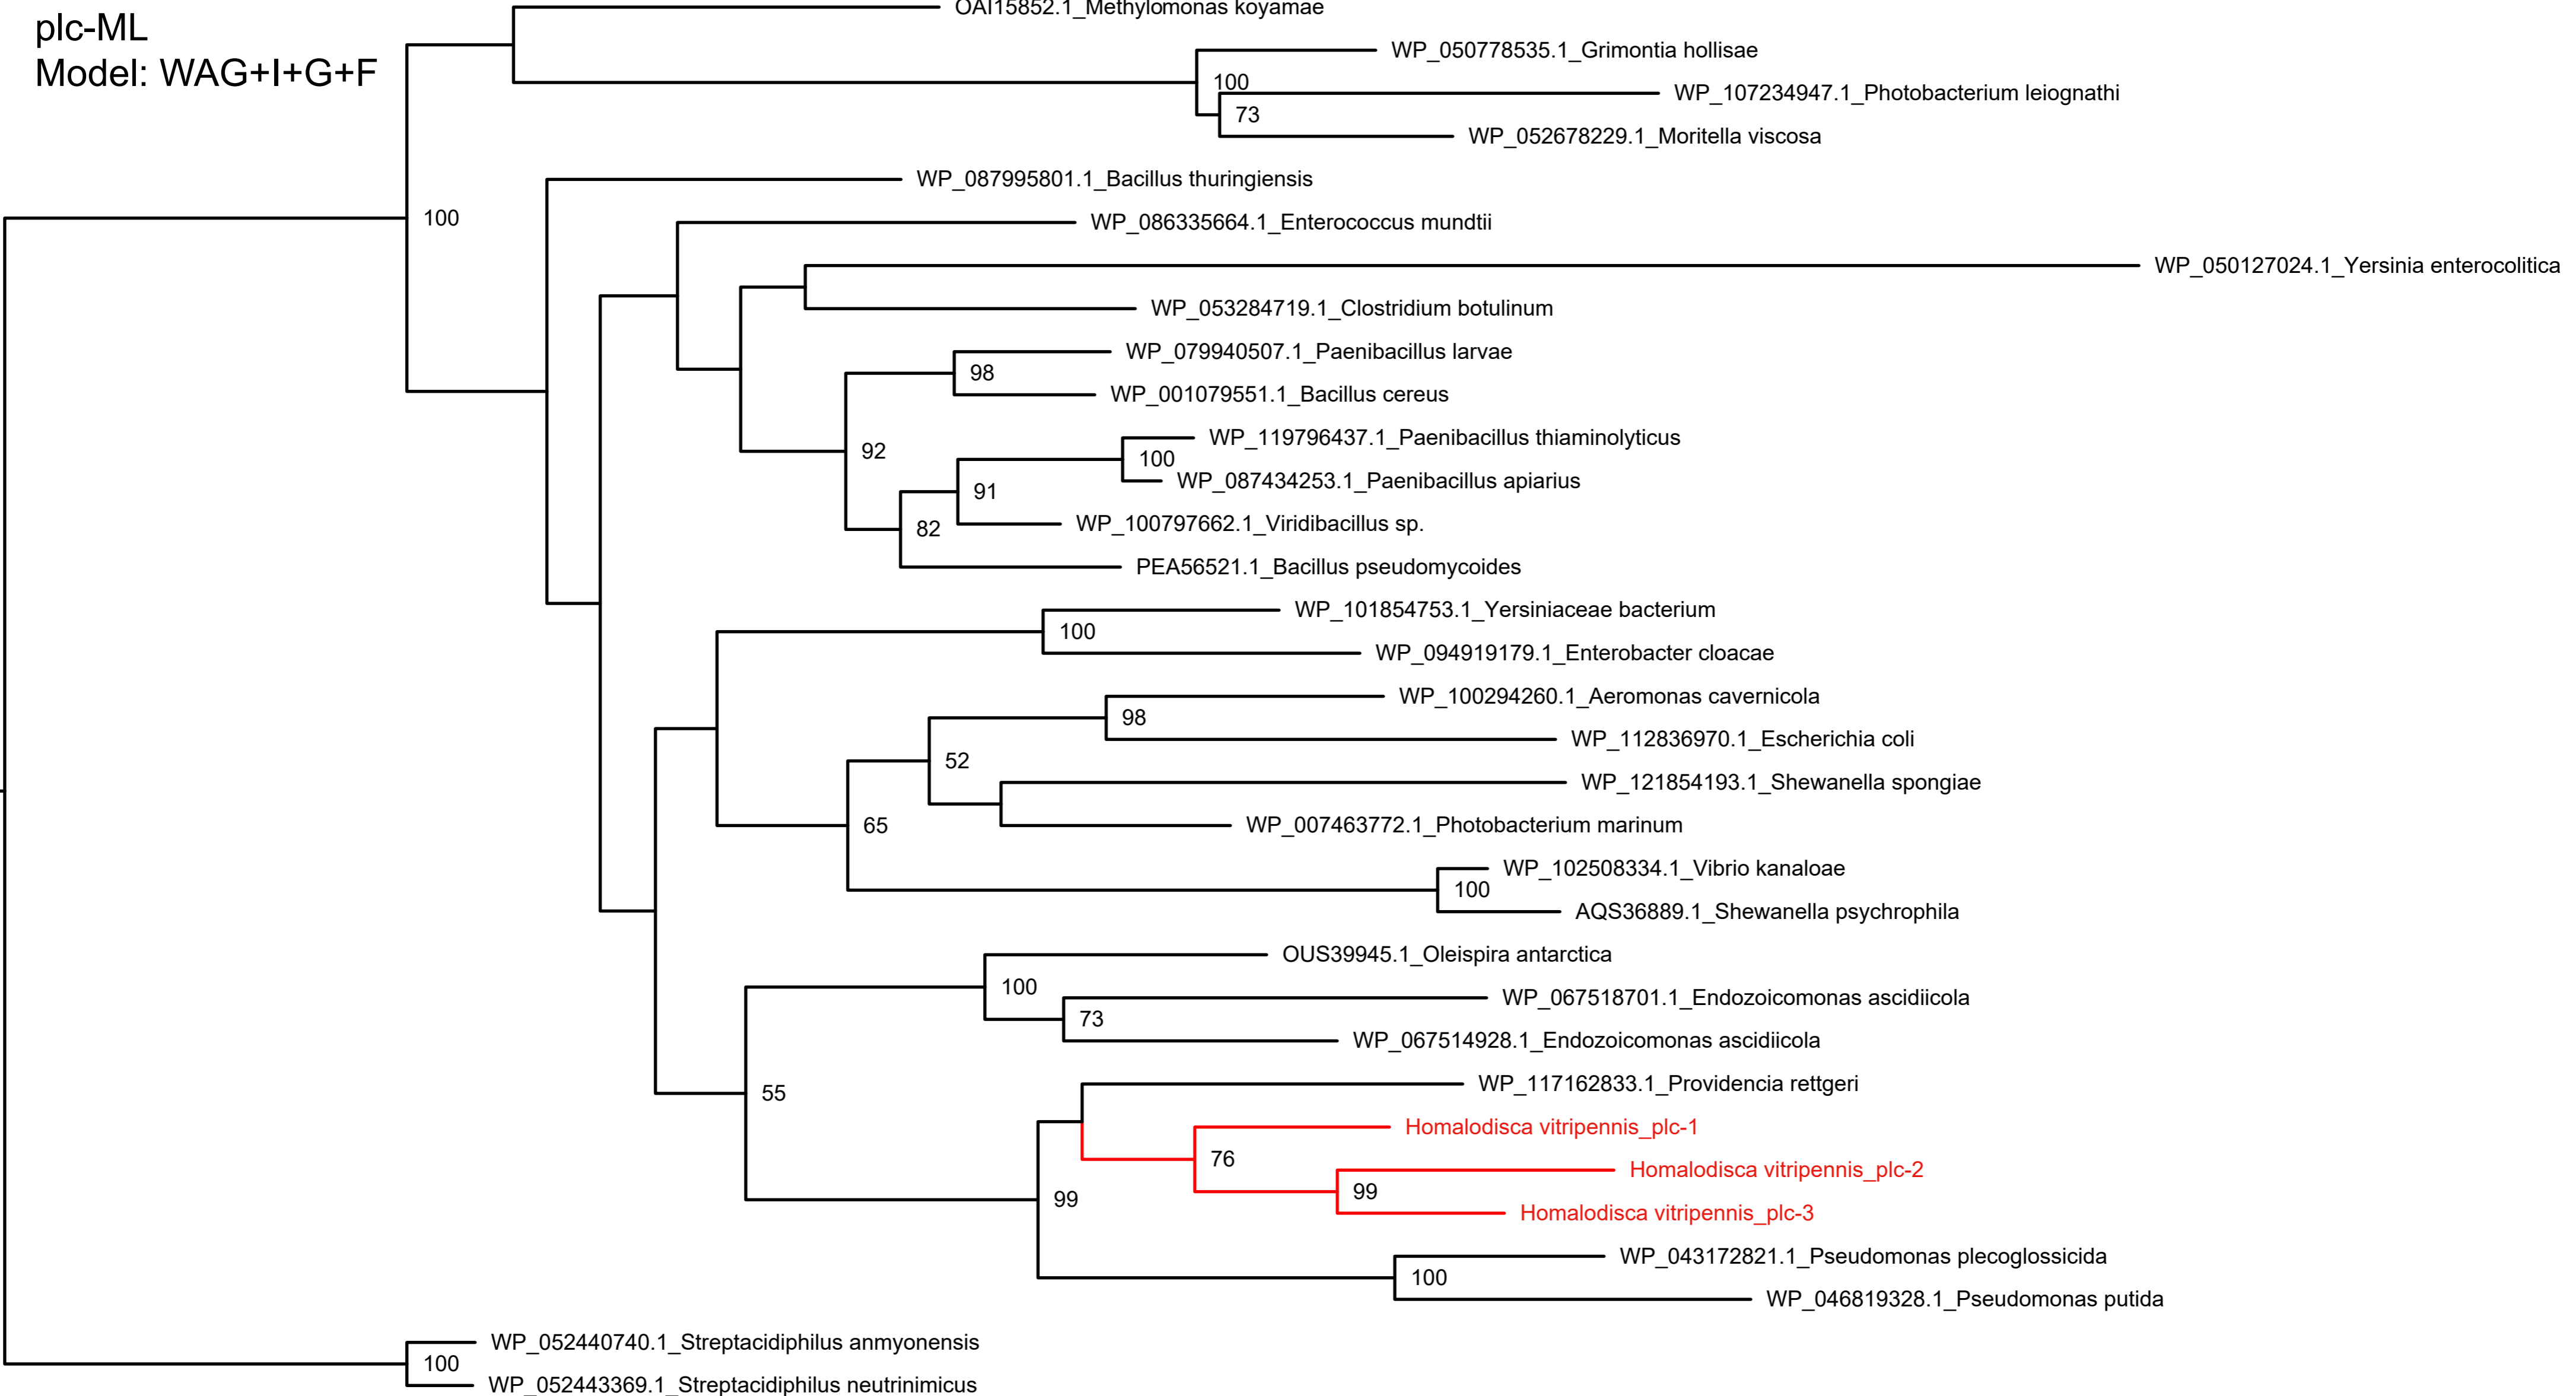

0.3

# GUF-Bayes

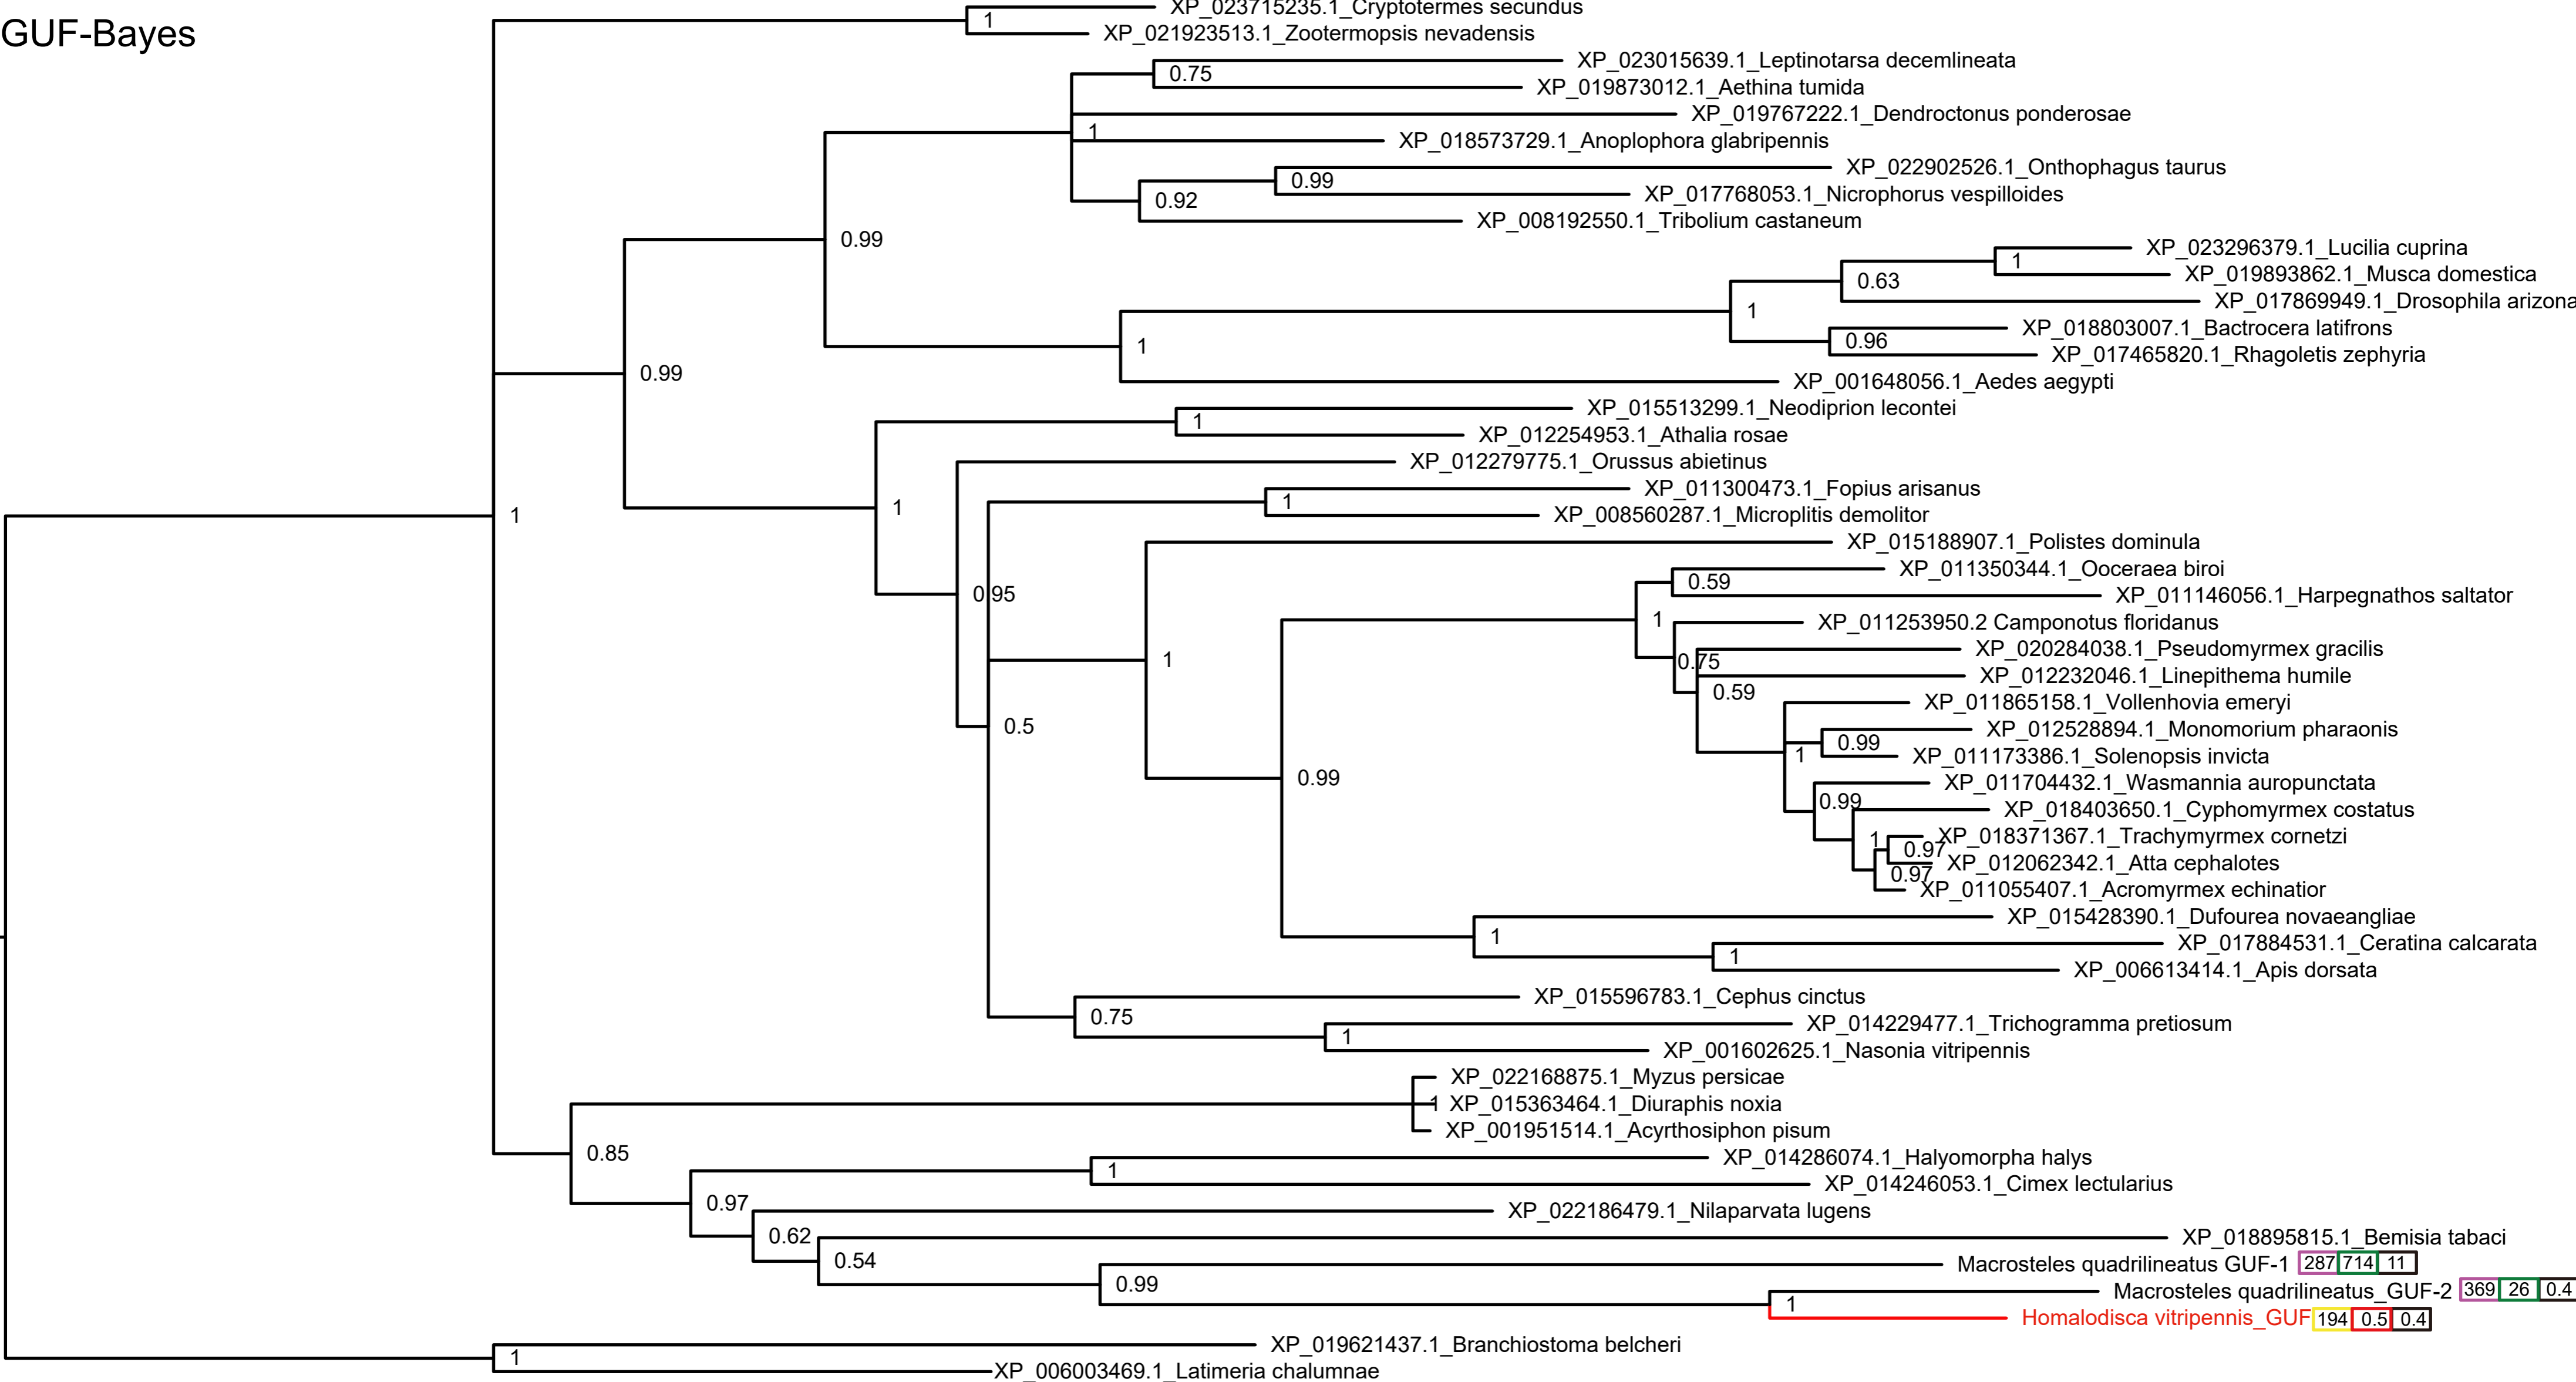

0.2

GUF-ML  
Model: LG+I+G

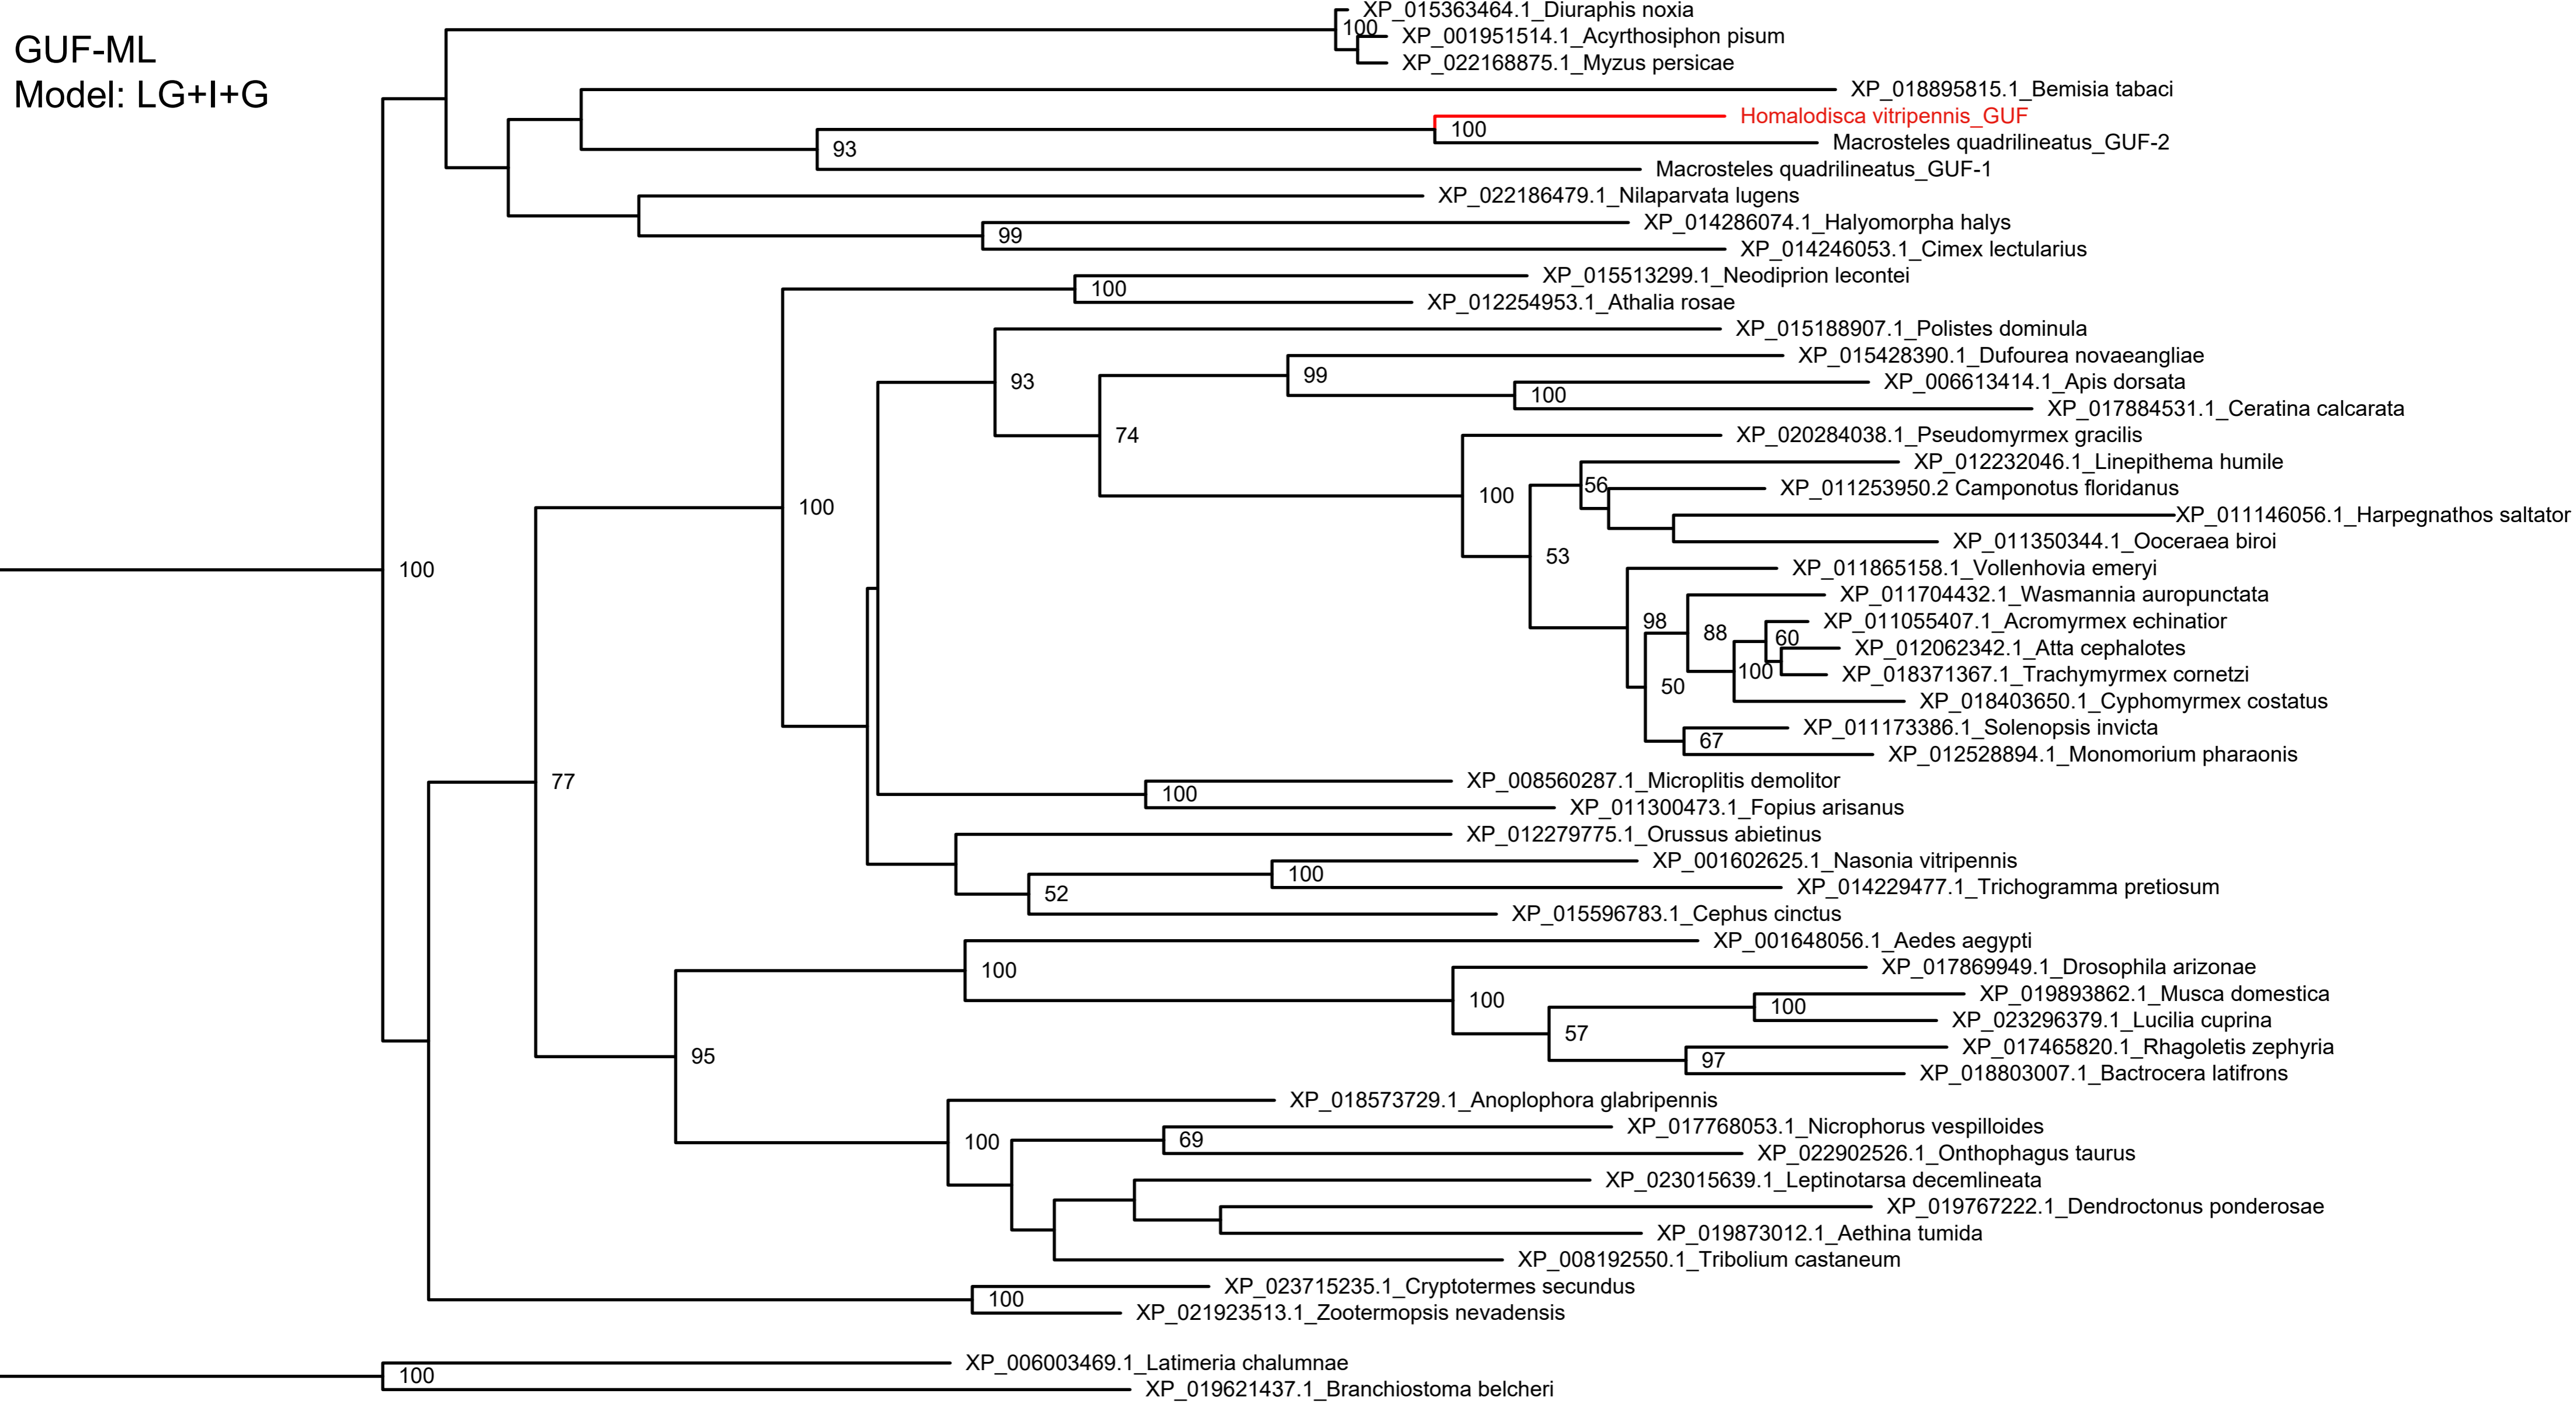

0.2

# TSFM-Bayes

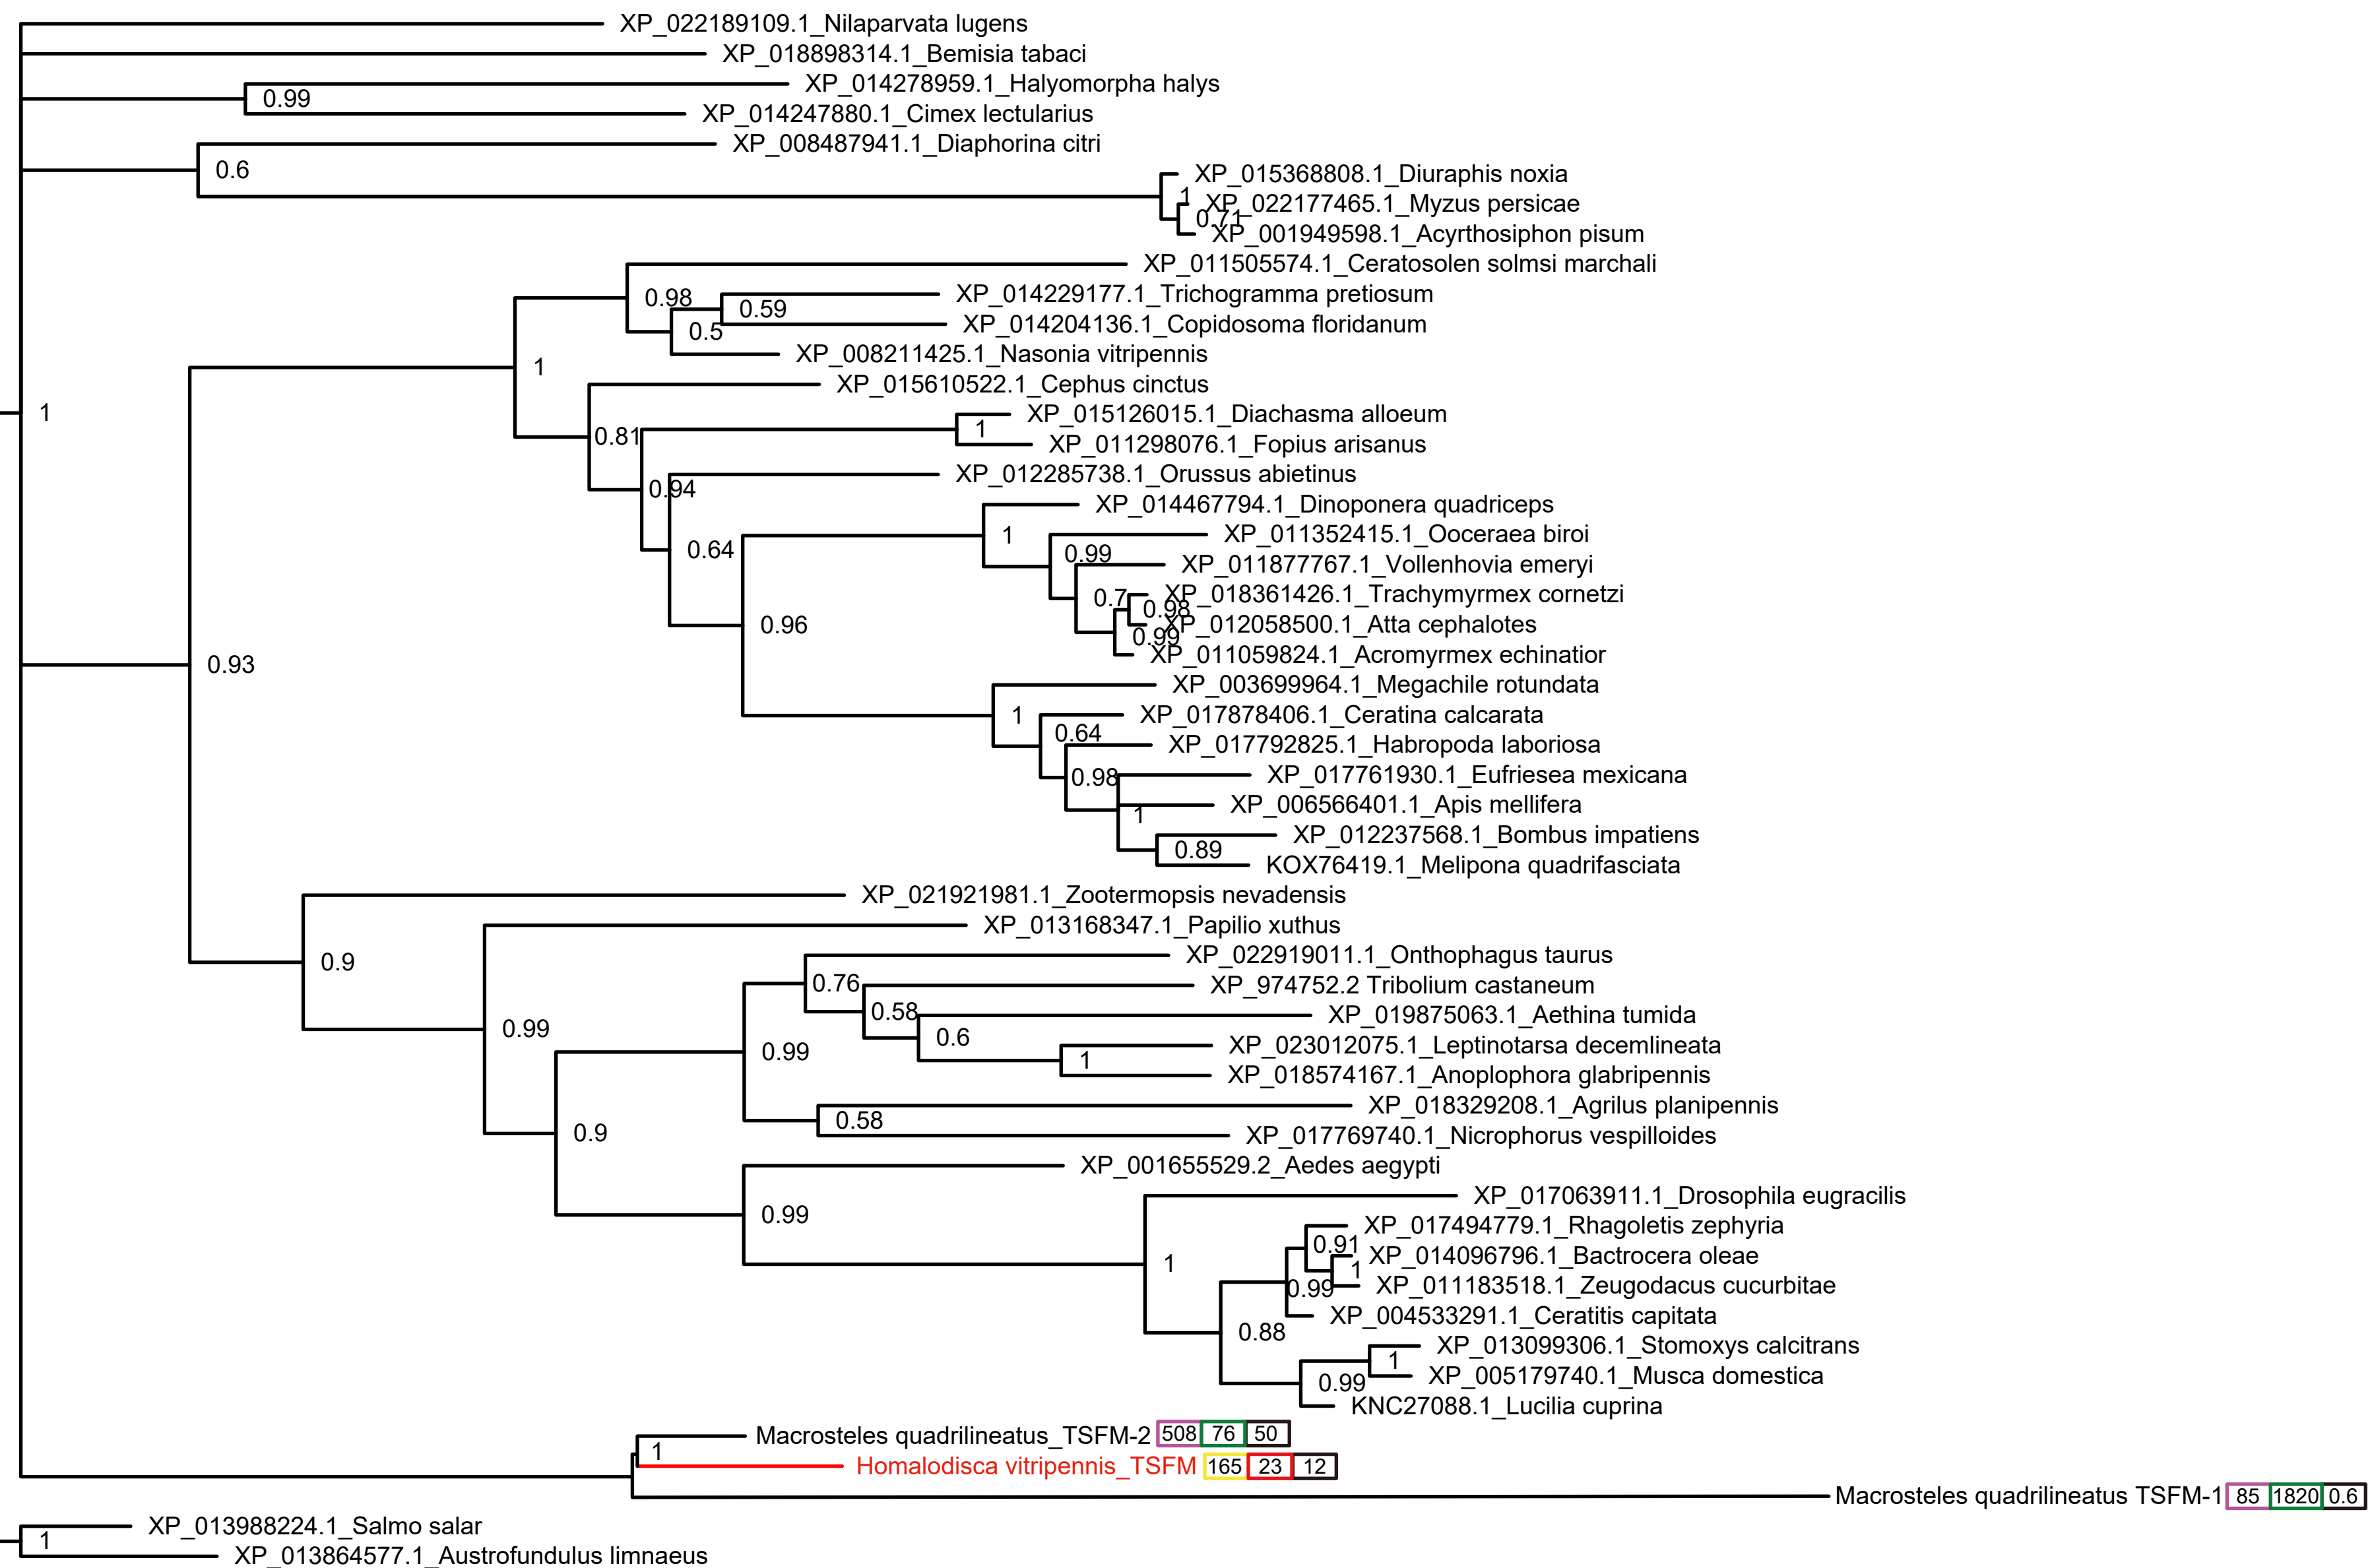

0.4

TSFM-ML  
Model: JTT+I+G+F

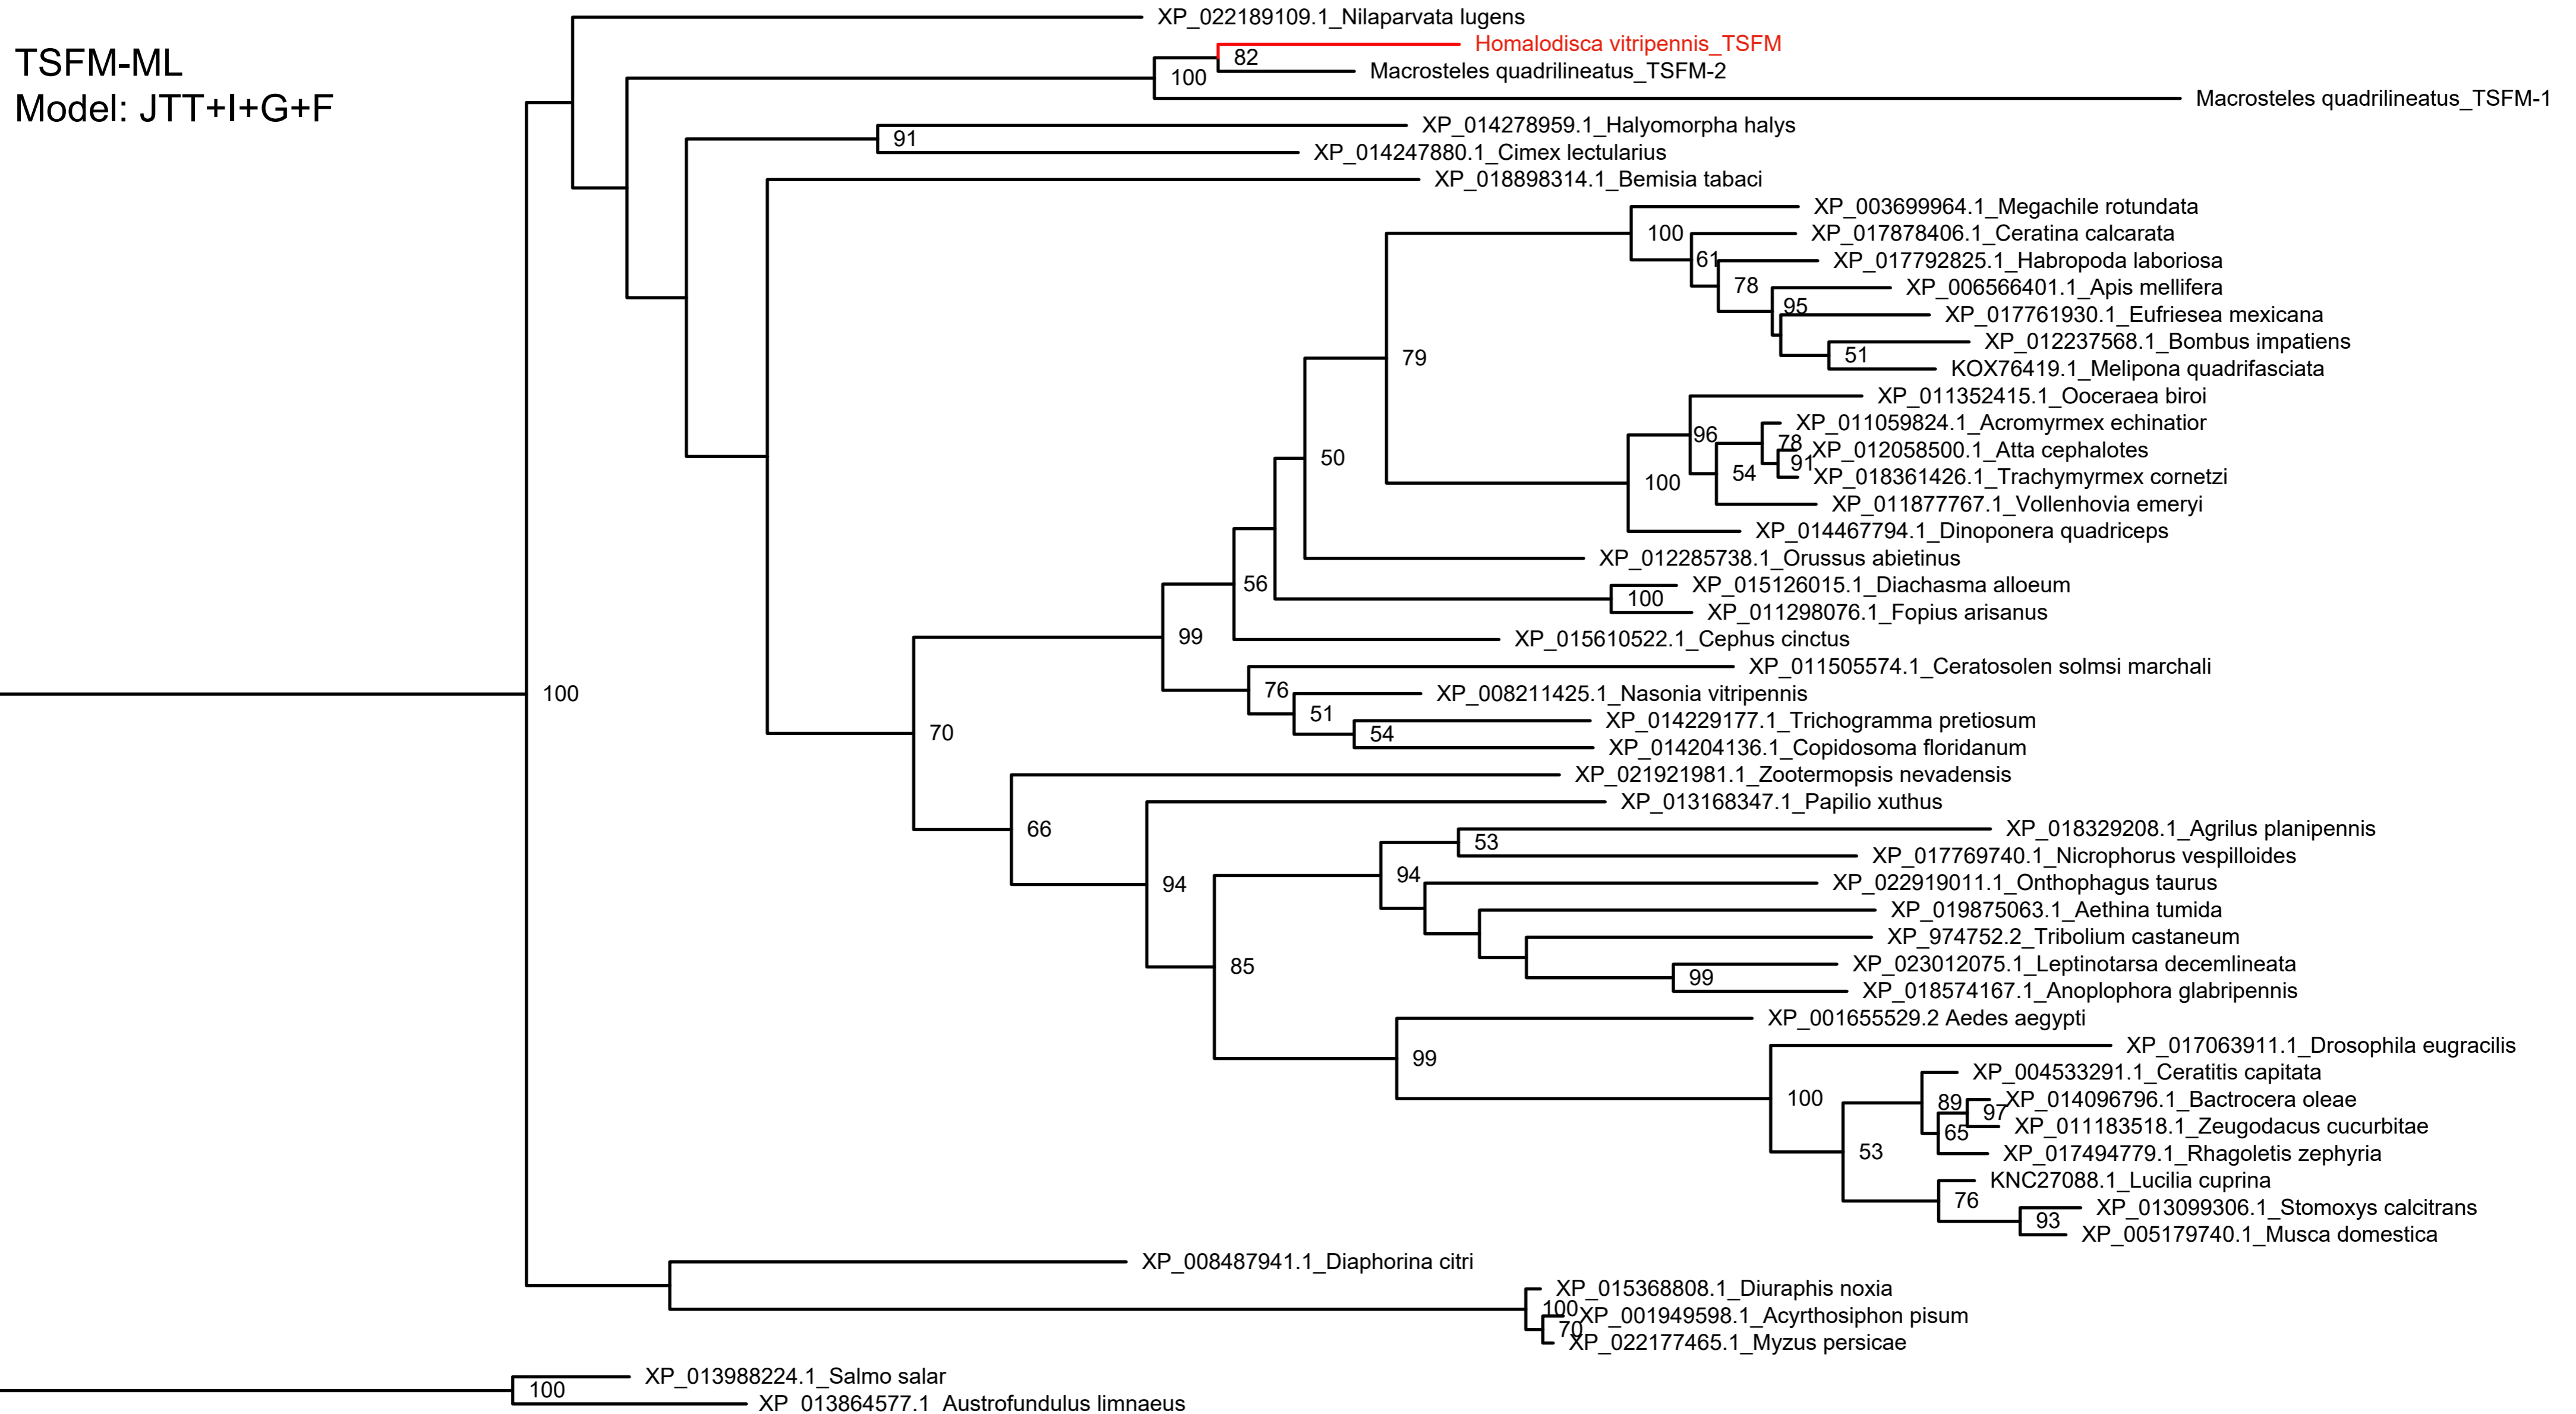

0.3
