# Supplementary material
Source: PubMed Central journal article supplement (PMC7242365)
Supplement: 41396_2020_616_MOESM3_ESM.pdf [file 41396_2020_616_MOESM3_ESM.pdf]

Log<sub>2</sub> Fold Change

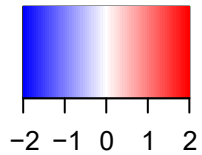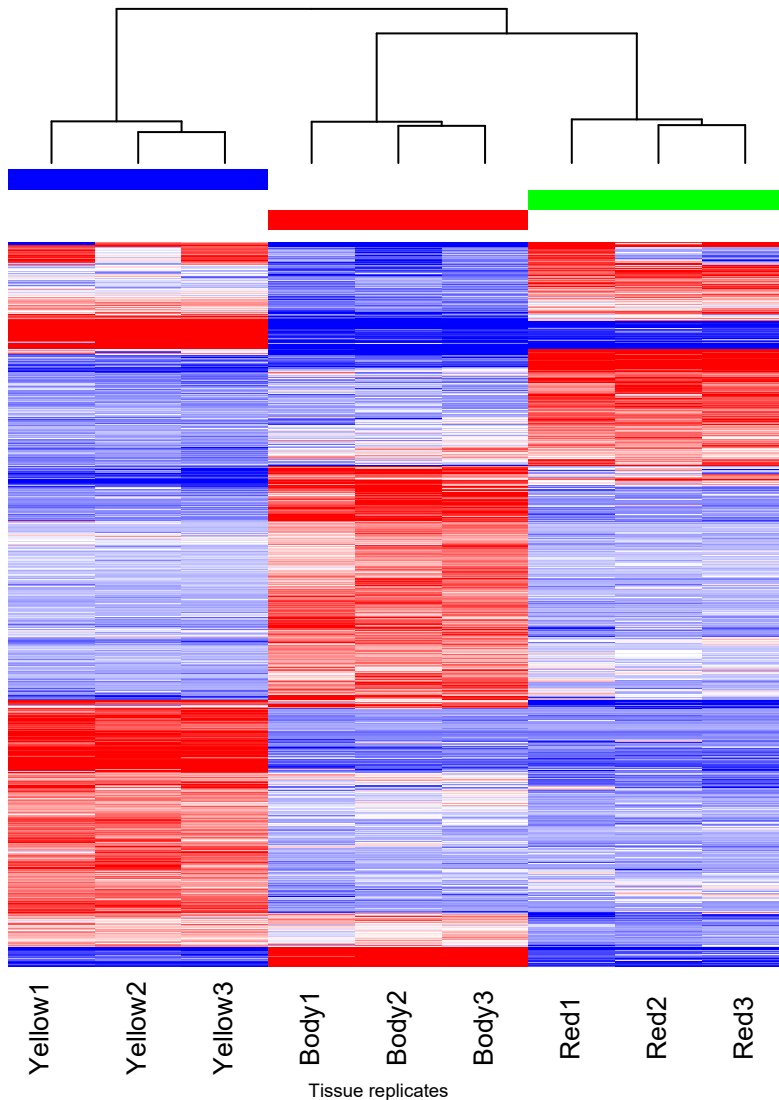

Figure S2 Matrix of differential gene expression (edgeR:  $P \leq 0.001$  and fold change  $\geq 2$ ) for pair-wise comparisons of the yellow and red bacteriomes and body tissues.
