# Supplementary material
Source: PubMed Central journal article supplement (PMC7242365)
Supplement: 41396_2020_616_MOESM4_ESM.pdf [file 41396_2020_616_MOESM4_ESM.pdf]

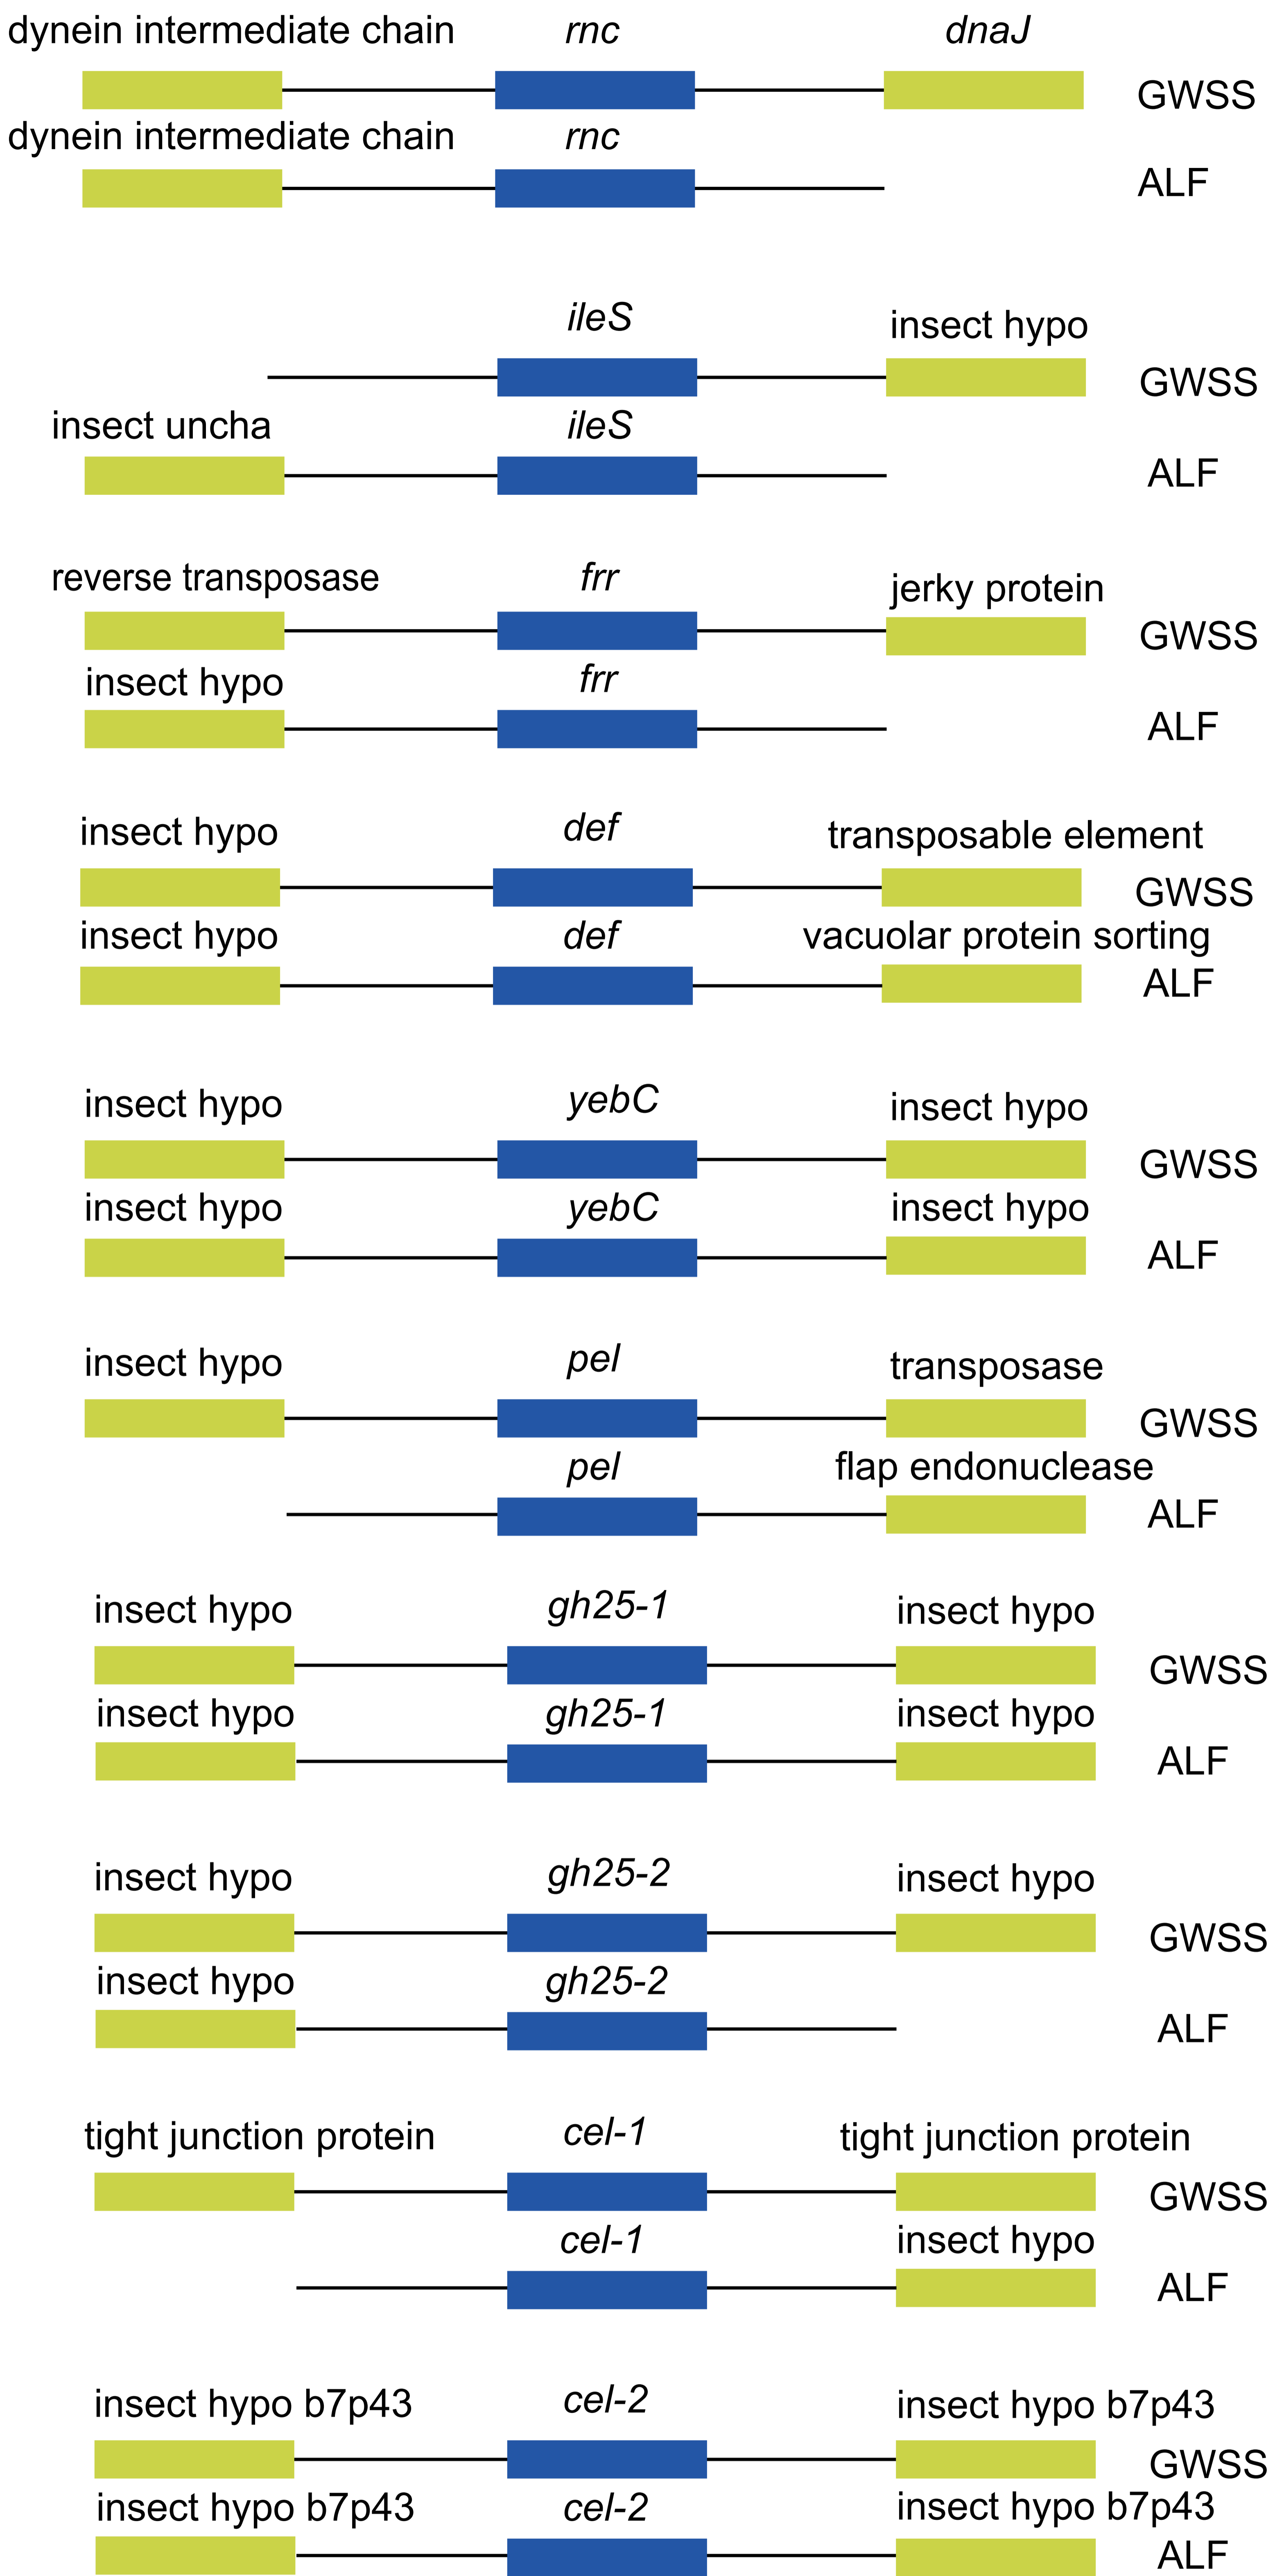

Figure S3. Identification of adjacent genes (yellow box) of each shared HTG (blue box) between GWSS and ALF. Abbreviations: uncha=uncharacterized protein; hypo=hypothetical protein.
