# Supplementary material
Source: PubMed Central journal article supplement (PMC7242365)
Supplement: 41396_2020_616_MOESM5_ESM.pdf [file 41396_2020_616_MOESM5_ESM.pdf]

Table S1 Summary of RNA-seq libraries

| Library             | Paired read (millions) |                  |                  |
|---------------------|------------------------|------------------|------------------|
|                     | Raw read               | Quality filtered | Symbiont removed |
| Red bacteriome_1    | 27.5                   | 26.4             | 5.0              |
| Yellow bacteriome_1 | 30.8                   | 29.6             | 10.8             |
| Body_1              | 27.4                   | 24.3             | 24.3             |
| Red bacteriome_2    | 65.4                   | 64.0             | 12.4             |
| Yellow bacteriome_2 | 42.1                   | 40.7             | 16.8             |
| Body_2              | 17.5                   | 16.8             | 16.8             |
| Red bacteriome_3    | 39.3                   | 38.2             | 11.4             |
| Yellow bacteriome_3 | 38.8                   | 37.5             | 16.3             |
| Body_3              | 17.8                   | 17.3             | 17.3             |
