# Supplementary material
Source: PubMed Central journal article supplement (PMC7242365)
Supplement: 41396_2020_616_MOESM7_ESM.pdf [file 41396_2020_616_MOESM7_ESM.pdf]

Table S3 Gene expression involved in nutrition synthesis and transport and cellular information processing in yellow and red bacteriomes and the remaining body tissues.

| Trinity ID     | FPKM (FC) |              |                | Gene  | Product                                     | EC number          | Function                  |
|----------------|-----------|--------------|----------------|-------|---------------------------------------------|--------------------|---------------------------|
|                | body      | red          | yellow         |       |                                             |                    |                           |
| DN151056_c1_g2 | 20.1      | 26.3 (-)     | 104.9 (5.4)    | PANK  | pantothenate kinase                         | 2.7.1.33           | CoA synthesis             |
| DN155361_c0_g1 | 15.9      | 18.5 (-)     | 8.6 (-)        | PPCS  | phosphopantothenate-cysteine ligase         | 6.3.2.5            |                           |
| DN155009_c0_g2 | 15.2      | 19.7 (-)     | 20.6 (-)       | PPCDC | phosphopentothenoylecysteine decarboxylase  | 4.1.1.36           |                           |
| DN143829_c0_g1 | 9.6       | 13.1 (-)     | 29.6 (2.9)     | COASY | bifunctional coenzyme A synthase            | 2.7.7.3 & 2.7.1.24 |                           |
| DN155712_c2_g2 | 13.2      | 6.8 (-)      | 861.7 (69.8)   | GDH   | glutamate dehydrogenase, mt                 | 1.4.1.3            | NH <sub>3</sub> recycling |
| DN154114_c1_g1 | 201.9     | 149.1 (-)    | 134.9 (-)      | GS    | glutamine synthetase                        | 6.3.1.2            |                           |
| DN158059_c0_g3 | 39.8      | 502.1 (12.8) | 126.7 (3.4)    | GOGAT | glutamate synthase (NADPH)                  | 1.4.1.13           |                           |
| DN149933_c0_g1 | 2.3       | 39 (23)      | 24.8 (11.3)    | ASR   | isoaspartyl peptidase/L-asparaginase        | 3.4.19.5 & 3.5.1.1 |                           |
| DN145636_c0_g2 | 2.9       | 22.9 (9.1)   | 3.4 (-)        | GADL1 | acidic amino acid decarboxylase GADL1       | 4.1.1.11           | β-alanine synthesis       |
| DN158110_c2_g1 | 4.6       | 1.9 (-)      | 1988.2 (455.1) | PAH   | Phenylalanine hydroxylase                   | 1.14.16.1          | Tyrosine synthesis        |
| DN149170_c0_g2 | 3.1       | 0.6 (-)      | 24 (7.5)       | RAD51 | DNA repair protein RAD51 homolog 3          | N/A                | DNA repair & replication  |
| DN159094_c0_g1 | 1.1       | 0.6 (-)      | 7.2 (10.6)     | HFM1  | ATP-dependent DNA helicase HFM1             | 3.6.4.12           |                           |
| DN74806_c0_g1  | 1.5       | 0.1 (-)      | 5.4 (3.7)      | PIF1  | ATP-dependent DNA helicase PIF1             | 3.6.4.12           |                           |
| DN154852_c1_g2 | 5.9       | 11.8 (-)     | 40.9 (6.5)     | LIG3  | DNA ligase 3                                | 6.5.1.1            |                           |
| DN162793_c6_g2 | 4         | 7.3 (-)      | 26.3 (8)       | DHX30 | ATP-dependent RNA helicase DHX30            | 3.6.4.13           |                           |
| DN159064_c0_g4 | 5.5       | 9.7 (-)      | 52.5 (9.8)     | DHX36 | ATP-dependent RNA helicase DHX36            | 3.6.4.13           |                           |
| DN136421_c0_g1 | 1.3       | 4.7 (-)      | 16 (12.1)      | RPB1  | DNA-directed RNA polymerase II subunit RPB1 | 2.7.7.6            | Transcription             |
| DN158446_c2_g1 | 2.7       | 1.9 (-)      | 9.1 (3.7)      | ALAS  | alanine--tRNA ligase, mt                    | 6.1.1.7            | Aminoacyl-tRNA formation  |
| DN141869_c0_g2 | 6.8       | 2.6 (-)      | 291.4 (48.5)   | ASPS  | aspartate--tRNA ligase                      | 6.1.1.12           |                           |
| DN142995_c0_g2 | 18.8      | 46.2 (2.5)   | 63 (3)         | ARGS  | arginine--tRNA ligase                       | 6.1.1.19           |                           |

|                |      |              |               |        |                                       |          |                        |
|----------------|------|--------------|---------------|--------|---------------------------------------|----------|------------------------|
| DN161509_c0_g3 | 3    | 3.8 (-)      | 21 (7)        | CYSS   | cysteine--tRNA ligase, mt             | 6.1.1.16 |                        |
| DN79877_c0_g1  | 10.6 | 13 (-)       | 59.3 (6.1)    | GLTX   | glutamate--tRNA ligase, mt            | 6.1.1.17 |                        |
| DN159506_c0_g2 | 18   | 50.1 (-)     | 80.8 (4.3)    | GLYS   | glycine--tRNA ligase                  | 6.1.1.14 |                        |
| DN161391_c0_g2 | 26.5 | 25.1 (-)     | 122.3 (4.6)   | HISS   | histidine--tRNA ligase                | 6.1.1.21 |                        |
| DN155807_c0_g4 | 49.3 | 88 (-)       | 127.9 (2.6)   | LYSS   | lysine--tRNA ligase                   | 6.1.1.6  |                        |
| DN159445_c0_g1 | 12.6 | 42.9 (3.2)   | 271.6 (12.1)  | METG   | methionine--tRNA ligase               | 6.1.1.10 |                        |
| DN163232_c1_g2 | 50.5 | 102 (-)      | 133.2 (2.8)   | THRS   | threonine--tRNA ligase                | 6.1.1.3  |                        |
| DN140792_c0_g1 | 11.9 | 23.2 (-)     | 164.9 (17.1)  | TFSM   | elongation factor Ts, mt              | N/A      | Translation            |
| DN160209_c1_g1 | 0.4  | 0.5 (-)      | 193.1 (445.7) | GUF    | translation factor GUF1 homolog, mt   | N/A      |                        |
| DN155796_c0_g1 | 1.1  | 0.1 (-)      | 26.6 (24.3)   | PAT-1  | proton-coupled amino acid transporter | N/A      | Amino acid transporter |
| DN162498_c0_g1 | 0.8  | 2.6 (-)      | 13.4 (19.7)   | PAT-2  | proton-coupled amino acid transporter | N/A      |                        |
| DN162674_c0_g1 | 1.2  | 0.1 (-)      | 63.9 (52)     | PAT-3  | proton-coupled amino acid transporter | N/A      |                        |
| DN146974_c0_g1 | 4.4  | 48.4 (10.6)  | 0.1 (-)       | PAT-4  | proton-coupled amino acid transporter | N/A      |                        |
| DN159316_c0_g3 | 2.1  | 0.2 (-)      | 74.4 (34.3)   | PAT-5  | proton-coupled amino acid transporter | N/A      |                        |
| DN158278_c0_g1 | 39.3 | 0.8 (-)      | 108.5 (4)     | PAT-6  | proton-coupled amino acid transporter | N/A      |                        |
| DN146033_c0_g1 | 0    | 0 (-)        | 47 (891.4)    | PAT-7  | proton-coupled amino acid transporter | N/A      |                        |
| DN161028_c1_g1 | 0.4  | 58.3 (157.6) | 0 (-)         | PAT-8  | proton-coupled amino acid transporter | N/A      |                        |
| DN153641_c3_g1 | 0    | 0 (-)        | 83 (11,585.2) | PAT-9  | proton-coupled amino acid transporter | N/A      |                        |
| DN154753_c0_g4 | 2.3  | 1.2 (-)      | 1242 (512)    | PAT-10 | proton-coupled amino acid transporter | N/A      |                        |
| DN157783_c0_g2 | 5.9  | 0.7 (-)      | 135.4 (27.9)  | PAT-11 | proton-coupled amino acid transporter | N/A      |                        |
| DN144557_c0_g1 | 0    | 0 (-)        | 51.6 (955.4)  | BAT-1  | b(0,+)-type amino acid transporter    | N/A      |                        |
| DN149645_c0_g4 | 5.6  | 43.7 (8)     | 1.5 (-)       | BAT-2  | b(0,+)-type amino acid transporter    | N/A      |                        |
| DN155947_c0_g1 | 10.6 | 1.7 (-)      | 25.2 (3)      | YLAT-1 | Y+L amino acid transporter            | N/A      |                        |
| DN127352_c0_g1 | 24.9 | 11.7 (-)     | 451.2 (13.9)  | YLAT-2 | Y+L amino acid transporter            | N/A      |                        |
| DN160184_c0_g1 | 4.8  | 270 (45.3)   | 87.8 (13)     | YLAT-3 | Y+L amino acid transporter            | N/A      |                        |

|                |       |               |                  |         |                                               |     |  |
|----------------|-------|---------------|------------------|---------|-----------------------------------------------|-----|--|
| DN61104_c0_g1  | 0.1   | 4.1 (36.9)    | 0 (-)            | VGLUT-1 | vesicular glutamate transporter               | N/A |  |
| DN129212_c0_g1 | 1.3   | 0.7 (-)       | 98.4 (73.5)      | VGLUT-2 | vesicular glutamate transporter               | N/A |  |
| DN148784_c0_g3 | 4.2   | 0.1 (-)       | 83.3 (19.7)      | VGLUT-3 | vesicular glutamate transporter               | N/A |  |
| DN96956_c0_g1  | 0     | 0.2 (-)       | 2.9 (39.4)       | NBAT    | neutral and basic amino acid transporter      | N/A |  |
| DN156988_c0_g1 | 10.2  | 75.8 (7.5)    | 9.9 (-)          | SNAT    | sodium-coupled neutral amino acid transporter | N/A |  |
| DN160184_c0_g1 | 4.8   | 270 (45.3)    | 87.7 (13)        | LAT     | large neutral amino acids transporter         | N/A |  |
| DN126771_c0_g1 | 0.3   | 0 (-)         | 23.8 (55.7)      | CAT     | cationic amino acid transporter               | N/A |  |
| DN149876_c0_g2 | 0     | 0 (-)         | 26.4 (1049.1)    | MBAT    | mt basic amino acids transporter              | N/A |  |
| DN155727_c0_g3 | 0     | 0.4 (-)       | 436.1 (57,052.4) | TRET-1  | facilitated trehalose transporter Tret1       | N/A |  |
| DN40504_c0_g1  | 0.2   | 4.5 (21.1)    | 0 (-)            | TRET-2  | facilitated trehalose transporter Tret1       | N/A |  |
| DN152415_c1_g1 | 5     | 2.2 (-)       | 21.5 (4.6)       | TRET-3  | facilitated trehalose transporter Tret1       | N/A |  |
| DN122455_c0_g2 | 1.1   | 0.2 (-)       | 51 (48.5)        | TRET-4  | facilitated trehalose transporter Tret1       | N/A |  |
| DN142534_c1_g1 | 21    | 4.5 (-)       | 1351.3 (64)      | TRET-5  | facilitated trehalose transporter Tret1       | N/A |  |
| DN154019_c3_g2 | 0.7   | 250.7 (337.8) | 0.4 (-)          | TRET-6  | facilitated trehalose transporter Tret1       | N/A |  |
| DN144255_c2_g2 | 4.8   | 1.1 (-)       | 23.2 (4.9)       | TRET-7  | facilitated trehalose transporter Tret1       | N/A |  |
| DN152297_c0_g2 | 0.6   | 145.5 (274.4) | 0.1 (-)          | TRET-8  | facilitated trehalose transporter Tret1       | N/A |  |
| DN157015_c2_g1 | 4     | 0.8 (-)       | 128 (39.4)       | TRET-9  | facilitated trehalose transporter Tret1       | N/A |  |
| DN146821_c0_g2 | 100.8 | 230 (-)       | 587.4 (4.9)      | TRET-10 | facilitated trehalose transporter Tret1       | N/A |  |
| DN133791_c0_g1 | 8.9   | 1 (-)         | 95.8 (11.3)      | TRET-11 | facilitated trehalose transporter Tret1       | N/A |  |
| DN164039_c0_g1 | 3.9   | 52.6 (13)     | 8.3 (-)          | TRET-12 | facilitated trehalose transporter Tret1       | N/A |  |
| DN135736_c7_g1 | 0.5   | 1.3 (-)       | 2470.2 (5,042.8) | TRET-13 | facilitated trehalose transporter Tret1       | N/A |  |
| DN140222_c0_g1 | 25.2  | 4.6 (-)       | 74.8 (3)         | TRET-14 | facilitated trehalose transporter Tret1       | N/A |  |
| DN155037_c0_g1 | 19.3  | 11 (-)        | 208.4 (10.6)     | TRET-15 | facilitated trehalose transporter Tret1       | N/A |  |
| DN149209_c0_g1 | 52.3  | 254.2 (4.6)   | 14.2 (-)         | TRET-16 | facilitated trehalose transporter Tret1       | N/A |  |
| DN142743_c0_g1 | 0     | 0.1 (-)       | 17.3 (1,910.9)   | TRET-17 | facilitated trehalose transporter Tret1       | N/A |  |

|                |      |               |               |         |                                           |          |                      |
|----------------|------|---------------|---------------|---------|-------------------------------------------|----------|----------------------|
| DN125872_c0_g1 | 0.3  | 0.3 (-)       | 260.8 (891.4) | TRET-18 | facilitated trehalose transporter Tret1   | N/A      |                      |
| DN148937_c0_g4 | 0.2  | 3 (16)        | 0.3 (-)       | TRET-19 | facilitated trehalose transporter Tret1   | N/A      |                      |
| DN150256_c0_g2 | 2.1  | 0.8 (-)       | 134.6 (68.6)  | TRET-20 | facilitated trehalose transporter Tret1   | N/A      |                      |
| DN147727_c0_g1 | 1.4  | 4.3 (-)       | 10.5 (7.5)    | TRET-21 | facilitated trehalose transporter Tret1   | N/A      |                      |
| DN147762_c2_g2 | 1.2  | 1.3 (-)       | 16 (13)       | TRET-22 | facilitated trehalose transporter Tret1   | N/A      |                      |
| DN129091_c0_g1 | 9.1  | 35.6 (3.7)    | 56.2 (6.5)    | TRET-23 | facilitated trehalose transporter Tret1   | N/A      |                      |
| DN150151_c0_g4 | 0    | 0 (-)         | 30.1 (418.8)  | SMVT-1  | sodium-dependent multivitamin transporter | N/A      |                      |
| DN114993_c0_g1 | 0.3  | 48 (151.2)    | 102.8 (345.6) | SMVT-2  | sodium-dependent multivitamin transporter | N/A      |                      |
| DN143224_c1_g3 | 6.6  | 67.5 (11)     | 9.8 (-)       | SMVT-3  | sodium-dependent multivitamin transporter | N/A      |                      |
| DN161485_c1_g2 | 2.7  | 85.8 (29)     | 5.2 (-)       | SMVT-4  | sodium-dependent multivitamin transporter | N/A      |                      |
| DN159586_c1_g3 | 4.5  | 45.7 (12.6)   | 9.2 (-)       | THIT-1  | thiamine transporter                      | N/A      | Vitamin transport    |
| DN140997_c0_g3 | 1.7  | 796.9 (450.1) | 2.9 (-)       | THIT-2  | thiamine transporter                      | N/A      |                      |
| DN154958_c0_g1 | 6.8  | 24.7 (3.5)    | 5.5 (-)       | PCFT-1  | proton-coupled folate transporter         | N/A      |                      |
| DN134396_c0_g1 | 4.1  | 0.2 (-)       | 20.5 (5.2)    | PCFT-2  | proton-coupled folate transporter         | N/A      |                      |
| DN150212_c2_g1 | 5.2  | 17.3 (4.3)    | 0.5 (-)       | PCFT-3  | proton-coupled folate transporter         | N/A      |                      |
| DN154058_c2_g1 | 16.4 | 199.3 (11.3)  | 49.1 (3)      | TREH-1  | trehalase                                 | 3.2.1.18 | trehalose hydrolysis |
| DN154236_c0_g2 | 14.7 | 266.4 (18.4)  | 149 (10.6)    | TREH-2  | trehalase                                 | 3.2.1.18 |                      |

Note: FPKM, fragments per kilobase per million; FC, fold change in expression of bacteriomes relative to body tissues; yellow, yellow bacteriome; red, red bacteriome; mt, mitochondrial; FC is represented with “-“ if p-value is higher than 0.001.
